# Supplementary material for: The mechanism and impact of mono/bis(iodoimidazolium) halogen bond donor catalysts on Michael addition of indole with trans-crotonophenone: DFT calculations
Source: Royal Society of Chemistry journal article supplement (doi:10.1039/d2cp00075j), 2022-01-01
Supplement: d2cp00075j1.pdf [file d2cp00075j1.pdf]

# Mechanism and Impact of Mono/bis(iodoimidazolium) Halogen-Bond Donor Catalysts on Michael Addition of Indole with Trans-crotonophenone: DFT Investigations

Yuanyuan Sun<sup>a</sup>, Ying Li<sup>a</sup>, Xiaoyan Li<sup>b,\*</sup>, Yanli Zeng<sup>a,\*</sup>

<sup>a</sup>College of Chemistry and Materials Science, Hebei Normal University, 050024-Shijiazhuang (China)

<sup>b</sup>Hebei Key Laboratory of Inorganic Nano-materials, Hebei Normal University, 050024-Shijiazhuang (China)

E-mail: <sup>a</sup>yanlizeng@hebtu.edu.cn; <sup>b</sup>lixiaoyan@hebtu.edu.cn

## Contents:

|                                                                                                                                                                        |    |
|------------------------------------------------------------------------------------------------------------------------------------------------------------------------|----|
| 1. Structural parameters and energy data .....                                                                                                                         | 2  |
| 2. Calculated Energies and Cartesian Coordinates .....                                                                                                                 | 5  |
| 2.1 Analysis in the CH <sub>3</sub> CN solvent. ....                                                                                                                   | 5  |
| 2.1.1 Uncatalyzed reaction.....                                                                                                                                        | 5  |
| 2.1.2 Cat1 (C <sub>5</sub> H <sub>8</sub> N <sub>2</sub> I <sup>+</sup> ) catalyzed reaction.....                                                                      | 13 |
| 2.1.3 Cat2 ((C <sub>4</sub> H <sub>5</sub> N <sub>2</sub> I <sup>+</sup> ) <sub>2</sub> C <sub>6</sub> H <sub>4</sub> ) catalyzed reaction.....                        | 25 |
| 2.1.4 Cat3 ((C <sub>4</sub> H <sub>5</sub> N <sub>2</sub> I <sup>+</sup> ) <sub>2</sub> C <sub>6</sub> H <sub>3</sub> CF <sub>3</sub> ) catalyzed reaction.....        | 41 |
| 2.1.5 Cat4 ((C <sub>4</sub> H <sub>5</sub> N <sub>2</sub> I <sup>+</sup> ) <sub>2</sub> C <sub>3</sub> H <sub>6</sub> ) catalyzed reaction.....                        | 57 |
| 2.1.6 Cat2 ((C <sub>4</sub> H <sub>5</sub> N <sub>2</sub> I <sup>+</sup> ) <sub>2</sub> C <sub>6</sub> H <sub>4</sub> ) catalyzed reaction—a water-bridge mechanism .. | 72 |

## 1. Structural parameters and energy data

The related configuration parameters along the reaction pathways in CH<sub>3</sub>CN solvent are shown in Table S1 and Table S2; Gibbs free energy of the direct hydrogen proton transfer pathway with or without catalyst in CH<sub>3</sub>CN solvent are shown in Table S3.

**Table S1** C(4)-C(5) distances (in Å) along the reaction pathway in CH<sub>3</sub>CN solvent

|      | uncat | cat1  | cat2  | cat3  | cat4  |
|------|-------|-------|-------|-------|-------|
| COM1 | 3.473 | 3.892 | 3.544 | 3.704 | 3.345 |
| TS   | 1.839 | 1.915 | 1.937 | 1.943 | 1.932 |
| COM2 | 1.602 | 1.570 | 1.589 | 1.589 | 1.590 |

**Table S2** O-I distances (in Å) along the reaction pathway in CH<sub>3</sub>CN solvent

|      | cat1   |        | cat2   |        | cat3   |        | cat4   |        |
|------|--------|--------|--------|--------|--------|--------|--------|--------|
|      | O-I(1) | O-I(2) | O-I(1) | O-I(2) | O-I(1) | O-I(2) | O-I(1) | O-I(2) |
| COM1 | 2.772  | 2.770  | 3.423  | 2.806  | 3.195  | 2.816  | 3.215  |        |
| TS   | 2.665  | 2.722  | 2.625  | 2.721  | 2.702  | 2.736  | 2.739  |        |
| COM2 | 2.503  | 2.618  | 2.669  | 2.624  | 2.653  | 2.640  | 2.679  |        |

**Table S3** Gibbs free energy of the direct hydrogen proton transfer pathway with and without catalyst in CH<sub>3</sub>CN solvent.(unit: kcal·mol<sup>-1</sup>)

|       | COM1 | TS1  | COM2 | TS2(b) | COM3(b) | P(b)  |
|-------|------|------|------|--------|---------|-------|
| uncat | -2.1 | 29.1 | 28.3 | 47.3   | -14.7   | -15.5 |
| cat1  | -1.0 | 27.3 | 21.0 | 43.8   | -15.9   | -12.7 |
| cat2  | -1.2 | 22.0 | 17.5 | 40.1   | -15.5   | -10.0 |
| cat3  | -1.0 | 20.6 | 17.3 | 41.3   | -16.6   | -9.8  |
| cat4  | -0.2 | 22.9 | 18.4 | 41.1   | -15.5   | -11.2 |

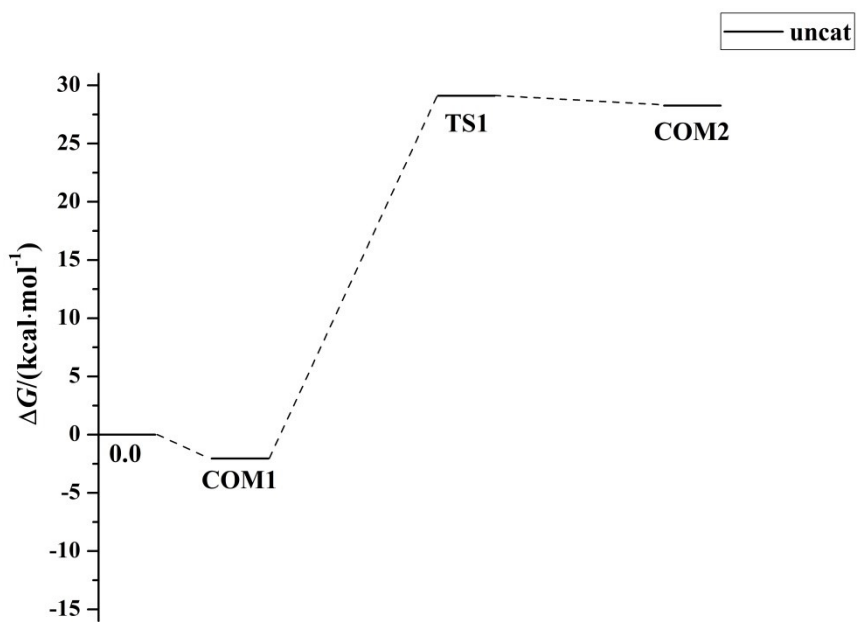

**Fig. S1.** Potential energy curves of the carbon-carbon coupling process without catalyst.

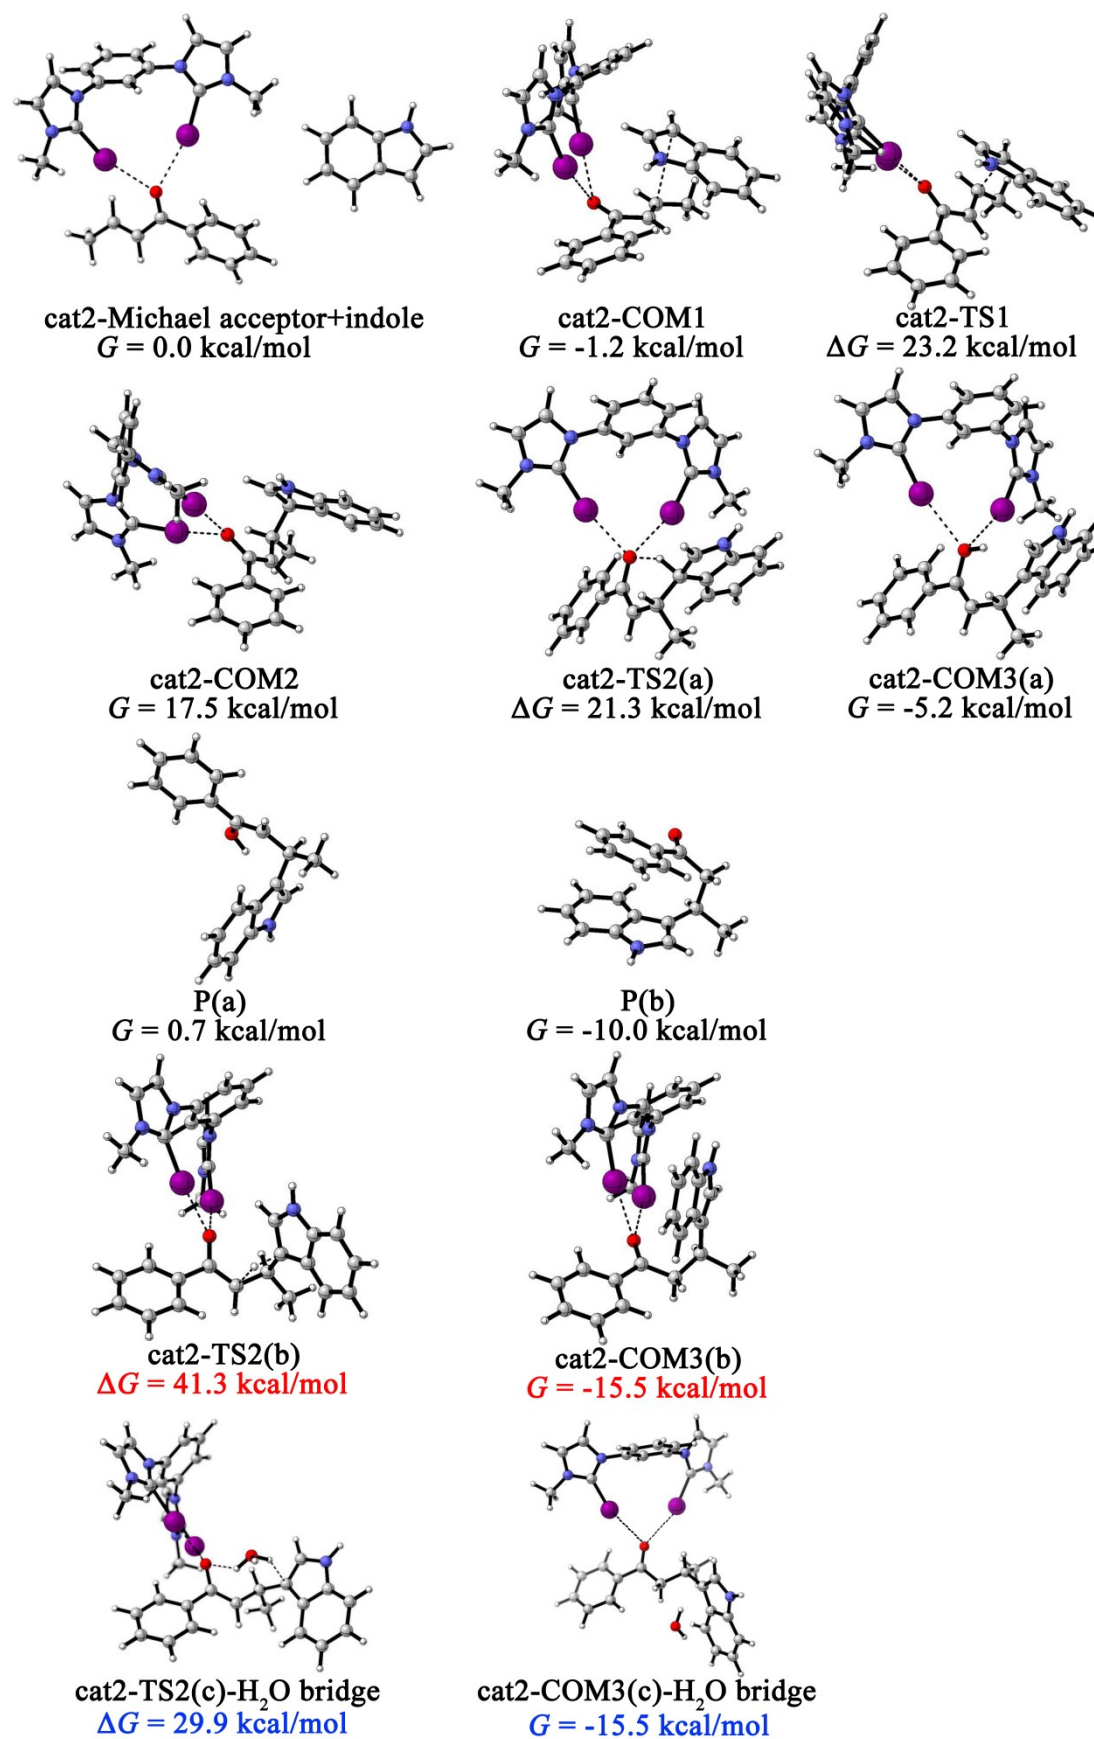

**Fig. S2.** Representation of the optimized of the saddle points (SMD18(CH<sub>3</sub>CN)-M06-2X/6-311+G(d,p) level) for the Michael addition reactions between indole and trans-

crotonophenone catalyzed by cat2. (Graphics by CYLview20; Legault, C. Y., Université de Sherbrooke, 2020, <http://www.cylview.org>)

## 2. Calculated Energies and Cartesian Coordinates

### 2.1 Analysis in the CH<sub>3</sub>CN solvent.

#### 2.1.1 Uncatalyzed reaction

##### Indole

Electronic energy (in solution) = -363.77508 Hartree

Entropic correction (in solution) = -363.66401 Hartree

Sum of electronic and thermal Free Energies (in solution) = -363.67483 Hartree

|   |             |             |             |
|---|-------------|-------------|-------------|
| C | -2.15445600 | 0.68947800  | 0.00003600  |
| C | -0.98411200 | 1.42746600  | 0.00003500  |
| C | -2.12733000 | -0.72137200 | 0.00001000  |
| C | -0.93111200 | -1.41739100 | -0.00001500 |
| C | 0.25036800  | -0.66742500 | -0.00001500 |
| C | 0.24809300  | 0.75039700  | 0.00000900  |
| C | 1.62355800  | 1.16705700  | -0.00000800 |
| N | 1.56115800  | -1.07461800 | -0.00003900 |
| C | 2.38092000  | 0.02724300  | -0.00000700 |
| H | 3.45350800  | -0.09464500 | -0.00000900 |
| H | 1.99808900  | 2.17925200  | -0.00000300 |
| H | -3.11117300 | 1.19928100  | 0.00005400  |
| H | -1.01355900 | 2.51185700  | 0.00005200  |
| H | -3.06209500 | -1.27041900 | 0.00000900  |
| H | -0.90520600 | -2.50128100 | -0.00003600 |
| H | 1.87675900  | -2.03442700 | -0.00006400 |

##### trans-crotonophenone

Electronic energy (in solution) = -462.22865 Hartree

Entropic correction (in solution) = -462.08230 Hartree

Sum of electronic and thermal Free Energies (in solution) = -462.09290 Hartree

|   |             |             |             |
|---|-------------|-------------|-------------|
| C | 3.03932500  | 0.72421400  | 0.22583600  |
| C | 1.71296500  | 1.13200800  | 0.18415100  |
| C | 3.35978200  | -0.62106800 | 0.04535900  |
| C | 2.35037200  | -1.55426700 | -0.17170500 |
| C | 1.01866700  | -1.14941700 | -0.19647300 |
| C | 0.69205400  | 0.19800400  | -0.02064000 |
| C | -0.72291800 | 0.69327800  | -0.07642800 |
| H | 3.82462700  | 1.45148900  | 0.39657300  |
| H | 1.45169400  | 2.17549800  | 0.31567600  |
| H | 4.39555900  | -0.93991400 | 0.07329600  |
| H | 2.59799500  | -2.59871100 | -0.32122300 |
| H | 0.24442600  | -1.88573000 | -0.37501200 |

|   |             |             |             |
|---|-------------|-------------|-------------|
| O | -0.94427800 | 1.87014500  | -0.30445000 |
| C | -1.82001300 | -0.27676900 | 0.16599800  |
| C | -3.09387100 | 0.05892600  | -0.05889300 |
| H | -1.57250700 | -1.26418200 | 0.53955100  |
| C | -4.26224000 | -0.83714700 | 0.16703500  |
| H | -3.30122300 | 1.05789300  | -0.43757600 |
| H | -4.81609900 | -0.97641000 | -0.76640800 |
| H | -4.95713400 | -0.37562800 | 0.87542200  |
| H | -3.95786200 | -1.81204400 | 0.54985900  |

### COM1

Electronic energy (in solution) = -826.01157 Hartree

Entropic correction (in solution) = -825.74957 Hartree

Sum of electronic and thermal Free Energies (in solution) = -825.75985 Hartree

|   |             |             |             |
|---|-------------|-------------|-------------|
| C | 4.19972800  | 1.59149300  | 0.60423600  |
| C | 3.11660200  | 0.76228400  | 0.88253100  |
| C | 5.05987800  | 1.28758900  | -0.44683700 |
| C | 4.84596600  | 0.14315200  | -1.21454400 |
| C | 3.77665400  | -0.69446000 | -0.92670000 |
| C | 2.89960100  | -0.38821100 | 0.11908600  |
| C | 1.76530400  | -1.33157600 | 0.39429100  |
| H | 4.37009300  | 2.47510000  | 1.20818400  |
| H | 2.46207400  | 1.00804200  | 1.70997600  |
| H | 5.89702000  | 1.93994000  | -0.66815000 |
| H | 5.51383800  | -0.09358500 | -2.03472800 |
| H | 3.60368000  | -1.59028700 | -1.51161300 |
| O | 1.82136000  | -2.48073100 | -0.01046300 |
| C | 0.58678600  | -0.81345200 | 1.12869100  |
| C | -0.43924500 | -1.61118500 | 1.44130900  |
| C | -1.68478200 | -1.15589500 | 2.11990500  |
| H | -1.69246100 | -0.07398700 | 2.26785000  |
| H | -1.78647300 | -1.65022400 | 3.09182500  |
| H | -2.55996400 | -1.44439300 | 1.52855900  |
| C | -3.50248000 | 0.43428900  | -0.33669000 |
| C | -2.23126600 | 0.24187300  | -0.93229100 |
| C | -1.27691700 | 1.26987200  | -0.84464300 |
| C | -1.60862500 | 2.43676200  | -0.17896500 |
| C | -2.88270100 | 2.60658000  | 0.40457500  |
| C | -3.84472200 | 1.61400200  | 0.33347000  |
| H | -3.11130400 | 3.53320900  | 0.91885300  |
| H | -4.82267800 | 1.73796300  | 0.78474300  |
| H | -0.29269600 | 1.14298900  | -1.28415400 |
| H | -0.88095800 | 3.23668600  | -0.10044200 |
| C | -3.45631700 | -1.62501700 | -1.22003300 |
| N | -4.22393100 | -0.71801400 | -0.53048500 |

|   |             |             |             |
|---|-------------|-------------|-------------|
| H | -3.85529000 | -2.59761900 | -1.46567600 |
| H | -5.17146000 | -0.87614300 | -0.21733800 |
| H | -0.37126400 | -2.66548800 | 1.17953500  |
| C | -2.22837300 | -1.08229300 | -1.48826200 |
| H | -1.41826700 | -1.56832100 | -2.01096400 |
| H | 0.54219100  | 0.24322100  | 1.36586200  |

**Transition State1 (TS1)**

Imaginary frequency -441.23 cm<sup>-1</sup>

Electronic energy (in solution) = -825.96808 Hartree

Entropic correction (in solution) = -825.69992 Hartree

Sum of electronic and thermal Free Energies (in solution) = -825.71024 Hartree

|   |             |             |             |
|---|-------------|-------------|-------------|
| C | 4.02656800  | 1.73910500  | 0.59501200  |
| C | 2.84097900  | 1.00894700  | 0.59553400  |
| C | 5.17449900  | 1.21429400  | 0.00547100  |
| C | 5.12560900  | -0.04271500 | -0.59376000 |
| C | 3.93681300  | -0.76528300 | -0.60192400 |
| C | 2.78223500  | -0.25637400 | 0.00063900  |
| C | 1.52226800  | -1.09264300 | -0.04252000 |
| H | 4.05213900  | 2.72238800  | 1.05154000  |
| H | 1.95549100  | 1.44076300  | 1.04793600  |
| H | 6.09749200  | 1.78312200  | 0.00808900  |
| H | 6.01399000  | -0.45815100 | -1.05676400 |
| H | 3.88572400  | -1.73856900 | -1.07600300 |
| O | 1.42162600  | -1.95074200 | -0.96031300 |
| C | 0.53004200  | -0.87947500 | 0.92070900  |
| C | -0.69230900 | -1.63720500 | 0.86232800  |
| C | -1.62858700 | -1.47769700 | 2.04034100  |
| H | -1.89252100 | -0.42781100 | 2.19572700  |
| H | -1.11731400 | -1.82537000 | 2.94231000  |
| H | -2.54577600 | -2.05897700 | 1.93099800  |
| C | -3.38158300 | 0.28367500  | -0.33109100 |
| C | -1.99344000 | 0.28573000  | -0.52950200 |
| C | -1.30468400 | 1.49670100  | -0.47744000 |
| C | -2.02830400 | 2.65889900  | -0.22684700 |
| C | -3.41582500 | 2.62679100  | -0.02684000 |
| C | -4.12135000 | 1.42995700  | -0.07434900 |
| H | -3.94850200 | 3.55066600  | 0.16533100  |
| H | -5.19310600 | 1.38978200  | 0.07915200  |
| H | -0.23344400 | 1.53229800  | -0.63801900 |
| H | -1.51165000 | 3.61097800  | -0.18835100 |
| C | -2.78667200 | -1.84394800 | -0.68776800 |
| N | -3.81190700 | -1.04679400 | -0.43597800 |
| H | -2.92885800 | -2.91086700 | -0.79543700 |
| H | -4.77044800 | -1.35736200 | -0.31155500 |

|   |             |             |             |
|---|-------------|-------------|-------------|
| H | -0.54896500 | -2.67316800 | 0.55869200  |
| C | -1.56065800 | -1.11217900 | -0.67172000 |
| H | -0.75205200 | -1.41097100 | -1.33689500 |
| H | 0.59454700  | -0.05473500 | 1.61995700  |

**COM2**

Electronic energy (in solution) = -825.97093 Hartree

Entropic correction (in solution) = -825.70127 Hartree

Sum of electronic and thermal Free Energies (in solution) = -825.71158 Hartree

|   |             |             |             |
|---|-------------|-------------|-------------|
| C | 4.19086100  | 1.57799400  | 0.76958800  |
| C | 2.97912500  | 0.89276500  | 0.76507900  |
| C | 5.24455200  | 1.15089100  | -0.03682000 |
| C | 5.07082400  | 0.03612400  | -0.85354600 |
| C | 3.85526800  | -0.64266600 | -0.86018500 |
| C | 2.79454600  | -0.23513100 | -0.04481800 |
| C | 1.50059600  | -1.02201100 | -0.10200700 |
| H | 4.31038300  | 2.45328900  | 1.39888100  |
| H | 2.16853200  | 1.25312700  | 1.38861400  |
| H | 6.18739600  | 1.68623700  | -0.03288100 |
| H | 5.88259500  | -0.30284000 | -1.48826400 |
| H | 3.70546000  | -1.50350100 | -1.50135000 |
| O | 1.30260300  | -1.73597700 | -1.14391300 |
| C | 0.61071900  | -0.93527700 | 0.94743300  |
| C | -0.69964900 | -1.64302500 | 0.86887500  |
| C | -1.52265700 | -1.50375200 | 2.14515200  |
| H | -1.71978200 | -0.45146400 | 2.37045400  |
| H | -0.96820700 | -1.92575100 | 2.98710300  |
| H | -2.48123800 | -2.02649500 | 2.07748800  |
| C | -3.39907200 | 0.27408300  | -0.40512100 |
| C | -2.00567100 | 0.29540500  | -0.32374300 |
| C | -1.36587800 | 1.51942200  | -0.16606300 |
| C | -2.14957800 | 2.67064300  | -0.08551900 |
| C | -3.54449300 | 2.61368300  | -0.16649000 |
| C | -4.20292400 | 1.39841100  | -0.33241200 |
| H | -4.12254400 | 3.52782400  | -0.10414100 |
| H | -5.28176500 | 1.33211900  | -0.40284400 |
| H | -0.28575500 | 1.57819400  | -0.11256100 |
| H | -1.66690100 | 3.63312700  | 0.03835600  |
| C | -2.75615300 | -1.86484100 | -0.59881400 |
| N | -3.78832400 | -1.07872200 | -0.57081900 |
| H | -2.87073700 | -2.93634900 | -0.70705500 |
| H | -4.75479700 | -1.39103900 | -0.64959500 |
| H | -0.55167100 | -2.70493300 | 0.64058200  |
| C | -1.50845000 | -1.11395200 | -0.40819200 |
| H | -0.79585400 | -1.30798500 | -1.22669600 |



H 0.79053700 -0.28729400 1.79658300

**The indirect hydrogen proton transfer reaction pathway  
Transition State2 TS2(a)**

Imaginary frequency -140.48 cm<sup>-1</sup>

Electronic energy (in solution) = -825.96952 Hartree

Entropic correction (in solution) = -825.70009 Hartree

Sum of electronic and thermal Free Energies (in solution) = -825.71040 Hartree

|   |             |             |             |
|---|-------------|-------------|-------------|
| C | 4.72892900  | 0.26224400  | 1.04858300  |
| C | 3.51860000  | -0.41193500 | 0.92192700  |
| C | 5.16116400  | 1.12794000  | 0.04453600  |
| C | 4.37392100  | 1.30540700  | -1.09015800 |
| C | 3.16549100  | 0.62478200  | -1.21720800 |
| C | 2.71302900  | -0.23278300 | -0.20966500 |
| C | 1.38947800  | -0.93025800 | -0.39035400 |
| H | 5.34153500  | 0.10512100  | 1.92965400  |
| H | 3.20723400  | -1.09483900 | 1.70448300  |
| H | 6.10551200  | 1.65123100  | 0.14373100  |
| H | 4.70307500  | 1.97229800  | -1.87976600 |
| H | 2.55201600  | 0.74805500  | -2.10186700 |
| O | 0.93346900  | -1.01488600 | -1.59913900 |
| C | 0.68961300  | -1.37487200 | 0.70090400  |
| C | -0.68173500 | -1.95554100 | 0.51757600  |
| C | -1.41069400 | -2.17799300 | 1.83879200  |
| H | -1.51352700 | -1.23744700 | 2.38767300  |
| H | -0.84632600 | -2.87273300 | 2.46660400  |
| H | -2.40932000 | -2.59414100 | 1.67827600  |
| C | -3.29696800 | 0.46503700  | -0.38656000 |
| C | -1.96330500 | 0.31323000  | 0.00670200  |
| C | -1.34016700 | 1.36770200  | 0.67116600  |
| C | -2.07776800 | 2.52202200  | 0.92182900  |
| C | -3.41083600 | 2.64427100  | 0.50963000  |
| C | -4.04947300 | 1.60777400  | -0.16119800 |
| H | -3.95274200 | 3.55962700  | 0.71556700  |
| H | -5.07862300 | 1.68288200  | -0.49103800 |
| H | -0.30646300 | 1.29082300  | 0.98563400  |
| H | -1.60912600 | 3.34831500  | 1.44370600  |
| C | -2.69941200 | -1.59144900 | -1.03997600 |
| N | -3.68425000 | -0.73340400 | -1.02190200 |
| H | -2.82388700 | -2.57516300 | -1.47495600 |
| H | -4.60498800 | -0.90040100 | -1.42084900 |
| H | -0.62474500 | -2.90944000 | -0.02385800 |
| C | -1.50368200 | -1.03014000 | -0.44458800 |
| H | -0.70065700 | -0.93239500 | -1.27735200 |

|   |            |             |            |
|---|------------|-------------|------------|
| H | 1.04592100 | -1.20150800 | 1.70915400 |
|---|------------|-------------|------------|

**COM3(a)**

Electronic energy (in solution) = -826.02516 Hartree

Entropic correction (in solution) = -825.75400 Hartree

Sum of electronic and thermal Free Energies (in solution) = -825.76429 Hartree

|   |             |             |             |
|---|-------------|-------------|-------------|
| C | -4.77641200 | -0.02319800 | 0.83819800  |
| C | -3.55017800 | 0.60367800  | 0.65228100  |
| C | -5.10468700 | -1.15972000 | 0.10094600  |
| C | -4.19714000 | -1.66077400 | -0.82750500 |
| C | -2.96748100 | -1.03592200 | -1.01464100 |
| C | -2.62488100 | 0.09670700  | -0.26816200 |
| C | -1.30007500 | 0.73426600  | -0.46132800 |
| H | -5.48324900 | 0.38407500  | 1.55224900  |
| H | -3.31861200 | 1.50152600  | 1.21361400  |
| H | -6.06353100 | -1.64461200 | 0.24434400  |
| H | -4.44483400 | -2.54156700 | -1.40919600 |
| H | -2.26348300 | -1.42991100 | -1.73718500 |
| O | -0.78183400 | 0.48403600  | -1.69908200 |
| C | -0.66516600 | 1.45516000  | 0.47281400  |
| C | 0.68273100  | 2.12555900  | 0.28758400  |
| C | 1.13876500  | 2.76022000  | 1.60768100  |
| H | 1.28215400  | 1.99148800  | 2.37210900  |
| H | 0.38998900  | 3.46854600  | 1.97163500  |
| H | 2.08320800  | 3.29107200  | 1.47244100  |
| C | 3.15775400  | -0.60390600 | -0.51361000 |
| C | 2.10697700  | -0.10475400 | 0.29483800  |
| C | 1.65337800  | -0.88001900 | 1.37687600  |
| C | 2.24941700  | -2.10568100 | 1.61765200  |
| C | 3.29453500  | -2.58211900 | 0.79856200  |
| C | 3.76222900  | -1.84295600 | -0.27377100 |
| H | 3.73990400  | -3.54673500 | 1.01409500  |
| H | 4.56485500  | -2.20492600 | -0.90628900 |
| H | 0.85025600  | -0.52209000 | 2.01196200  |
| H | 1.91063900  | -2.71371900 | 2.44868000  |
| C | 2.55281000  | 1.39267000  | -1.32551700 |
| N | 3.40754000  | 0.32918500  | -1.48819800 |
| H | 2.59094300  | 2.23637300  | -1.99975800 |
| H | 4.09719300  | 0.24279200  | -2.22138000 |
| H | 0.57467900  | 2.92817400  | -0.45399800 |
| C | 1.73401500  | 1.18066200  | -0.24520400 |
| H | 0.15765600  | 0.72218100  | -1.70841500 |
| H | -1.14540900 | 1.56151400  | 1.43898100  |

**The direct hydrogen proton transfer reaction pathway**

**Transition State2 TS2(b)**Imaginary frequency -1300.49 cm<sup>-1</sup>

Electronic energy (in solution) = -825.93701 Hartree

Entropic correction (in solution) = -825.67088 Hartree

Sum of electronic and thermal Free Energies (in solution) = -825.68119 Hartree

|   |             |             |             |
|---|-------------|-------------|-------------|
| C | -4.34157000 | 0.84026000  | 1.78420600  |
| C | -3.14213400 | 0.84729100  | 1.07952200  |
| C | -5.36831700 | -0.02605300 | 1.41472800  |
| C | -5.18309600 | -0.89316400 | 0.34120900  |
| C | -3.98028700 | -0.88929500 | -0.35735800 |
| C | -2.94996600 | -0.01417800 | -0.00561500 |
| C | -1.67648400 | -0.05716800 | -0.82169800 |
| H | -4.47358900 | 1.50921900  | 2.62715900  |
| H | -2.34745700 | 1.51532900  | 1.39103600  |
| H | -6.30297100 | -0.02826400 | 1.96385400  |
| H | -5.97580100 | -1.57322000 | 0.04983600  |
| H | -3.81639700 | -1.56514500 | -1.18811600 |
| O | -1.45859100 | -1.07937200 | -1.51672900 |
| C | -0.77689200 | 1.01951000  | -0.74104900 |
| C | 0.48769800  | 0.96883700  | -1.59729400 |
| C | 1.12206900  | 2.33916700  | -1.78258400 |
| H | 1.22047500  | 2.86392500  | -0.83007800 |
| H | 0.48046700  | 2.94743200  | -2.42505900 |
| H | 2.10814000  | 2.27080900  | -2.24778300 |
| C | 3.08188900  | -1.09809700 | 0.28710000  |
| C | 2.56757800  | 0.18134100  | 0.00922100  |
| C | 3.20896800  | 1.29155900  | 0.56727700  |
| C | 4.33427000  | 1.08723700  | 1.35463800  |
| C | 4.82183800  | -0.20137700 | 1.61738900  |
| C | 4.19579600  | -1.31992100 | 1.09018300  |
| H | 5.69850700  | -0.32459900 | 2.24187700  |
| H | 4.55147400  | -2.32399900 | 1.28784400  |
| H | 2.84778300  | 2.29604500  | 0.39475400  |
| H | 4.84472100  | 1.94308400  | 1.78031900  |
| C | 1.30663100  | -1.42663800 | -1.03774800 |
| N | 2.28431900  | -2.03150600 | -0.37138100 |
| H | 0.58806000  | -1.96686900 | -1.63330800 |
| H | 2.41900200  | -3.03560800 | -0.32788100 |
| H | 0.27525500  | 0.52568400  | -2.57571300 |
| C | 1.33686200  | -0.02313200 | -0.78720600 |
| H | 0.36269100  | 0.07911700  | 0.03569200  |
| H | -1.07098800 | 1.96549300  | -0.30045200 |

**COM3(b)**

Electronic energy (in solution) = -826.04042 Hartree

Entropic correction (in solution) = -825.76971 Hartree

Sum of electronic and thermal Free Energies (in solution) = -825.78000 Hartree

|   |             |             |             |
|---|-------------|-------------|-------------|
| C | 4.15443400  | 1.34174400  | 1.07920000  |
| C | 3.06139100  | 0.47991300  | 1.06165000  |
| C | 4.87475000  | 1.57910900  | -0.08790800 |
| C | 4.50655600  | 0.94758500  | -1.27545100 |
| C | 3.42242200  | 0.08020700  | -1.29151600 |
| C | 2.68964300  | -0.15855700 | -0.12458500 |
| C | 1.52918400  | -1.11173800 | -0.19020900 |
| H | 4.44101000  | 1.82915400  | 2.00381200  |
| H | 2.51057700  | 0.30441100  | 1.97800100  |
| H | 5.72237800  | 2.25496900  | -0.07359200 |
| H | 5.06555000  | 1.13320000  | -2.18537900 |
| H | 3.12893600  | -0.41952300 | -2.20723300 |
| O | 1.34549700  | -1.77478500 | -1.18991800 |
| C | 0.63242800  | -1.24081600 | 1.02260000  |
| C | -0.68640300 | -1.96913100 | 0.74179100  |
| C | -1.35865500 | -2.36867100 | 2.06055200  |
| H | -1.57817700 | -1.49217100 | 2.67581100  |
| H | -0.70733300 | -3.03047100 | 2.63779800  |
| H | -2.29873700 | -2.89191200 | 1.87040000  |
| C | -2.98583100 | 0.51209400  | -0.93070200 |
| C | -2.19415600 | 0.14279800  | 0.18798500  |
| C | -2.14027500 | 1.01951100  | 1.28859700  |
| C | -2.85644000 | 2.20342900  | 1.24557300  |
| C | -3.63625000 | 2.54473500  | 0.12130400  |
| C | -3.71121000 | 1.70747200  | -0.97797900 |
| H | -4.18609000 | 3.47904400  | 0.11883600  |
| H | -4.30784600 | 1.96299100  | -1.84652800 |
| H | -1.54549600 | 0.77529100  | 2.16181700  |
| H | -2.81945000 | 2.88282900  | 2.08957500  |
| C | -2.04807900 | -1.47076100 | -1.37063600 |
| N | -2.87768700 | -0.48897300 | -1.86059500 |
| H | -1.82776300 | -2.34652200 | -1.96328000 |
| H | -3.32821500 | -0.50224100 | -2.76452100 |
| H | -0.45396400 | -2.87984400 | 0.18335300  |
| C | -1.60154000 | -1.13945000 | -0.12008800 |
| H | 0.44146500  | -0.24967100 | 1.44288000  |
| H | 1.21117500  | -1.78529000 | 1.78068700  |

**Product P(b)**

Electronic energy (in solution) = -826.04392 Hartree

Entropic correction (in solution) = -825.77107 Hartree

Sum of electronic and thermal Free Energies (in solution) = -825.78153 Hartree

|   |            |            |             |
|---|------------|------------|-------------|
| C | 1.39189500 | 1.81678700 | -1.92763200 |
|---|------------|------------|-------------|

|   |             |             |             |
|---|-------------|-------------|-------------|
| C | 0.16083000  | 1.78602700  | -1.27716000 |
| C | 2.57190600  | 1.84080600  | -1.19021500 |
| C | 2.52182500  | 1.85354800  | 0.20397300  |
| C | 1.29444600  | 1.83339800  | 0.85256500  |
| C | 0.10326400  | 1.78735900  | 0.11888100  |
| C | -1.18605600 | 1.67686700  | 0.88210500  |
| H | 1.42712600  | 1.81583600  | -3.01109200 |
| H | -0.74467500 | 1.75868700  | -1.86932700 |
| H | 3.52934800  | 1.85062600  | -1.69897700 |
| H | 3.43929100  | 1.87105300  | 0.78114700  |
| H | 1.24351800  | 1.82716900  | 1.93504600  |
| O | -1.20720100 | 1.92144200  | 2.07354900  |
| C | -2.44252800 | 1.18744200  | 0.19479800  |
| C | -2.56940400 | -0.35842900 | 0.27466700  |
| C | -3.87868100 | -0.78885400 | -0.38553000 |
| H | -3.88174500 | -0.52441700 | -1.44690100 |
| H | -4.72956200 | -0.29231600 | 0.08710400  |
| H | -4.01781000 | -1.86906800 | -0.30196000 |
| C | 0.77518900  | -1.81408800 | -0.61729400 |
| C | -0.15243100 | -1.37221400 | 0.35833500  |
| C | 0.24694400  | -1.31626300 | 1.70425100  |
| C | 1.53700000  | -1.69218100 | 2.03525300  |
| C | 2.44694500  | -2.12312500 | 1.04633500  |
| C | 2.08174300  | -2.19250000 | -0.28738900 |
| H | 3.45229500  | -2.40590800 | 1.33754700  |
| H | 2.77835800  | -2.52254100 | -1.04986000 |
| H | -0.44228100 | -0.97123100 | 2.46850000  |
| H | 1.86103100  | -1.65079700 | 3.06904500  |
| C | -1.14041900 | -1.29560200 | -1.65804100 |
| N | 0.14273000  | -1.76153800 | -1.83294100 |
| H | 0.54582400  | -2.03999000 | -2.71633600 |
| H | -2.60577300 | -0.62514300 | 1.33650100  |
| C | -1.36869400 | -1.03191800 | -0.33258800 |
| H | -1.79032100 | -1.16893000 | -2.51150400 |
| H | -2.47814200 | 1.48637200  | -0.85401100 |
| H | -3.29063100 | 1.63748200  | 0.71538700  |

### 2.1.2 Cat1 (C<sub>5</sub>H<sub>8</sub>N<sub>2</sub>I<sup>+</sup>) catalyzed reaction

#### cat1 (C<sub>5</sub>H<sub>8</sub>N<sub>2</sub>I<sup>+</sup>)

Electronic energy (in solution) = -602.27768 Hartree

Entropic correction (in solution) = -602.16953Hartree

Sum of electronic and thermal Free Energies (in solution) = -602.18018 Hartree

|   |            |             |             |
|---|------------|-------------|-------------|
| C | 0.00000000 | 0.67897000  | -2.67855800 |
| C | 0.00000000 | -0.67897000 | -2.67855800 |

|   |             |             |             |
|---|-------------|-------------|-------------|
| C | 0.00000000  | 0.00000000  | -0.58501600 |
| H | 0.00000000  | -1.39189400 | -3.48627600 |
| H | 0.00000000  | 1.39189400  | -3.48627600 |
| N | 0.00000000  | -1.08535700 | -1.36426500 |
| N | 0.00000000  | 1.08535700  | -1.36426500 |
| C | 0.00000000  | -2.47496100 | -0.90481600 |
| H | 0.89557200  | -2.66303300 | -0.31379800 |
| H | -0.89557200 | -2.66303300 | -0.31379800 |
| H | 0.00000000  | -3.11102300 | -1.78601000 |
| C | 0.00000000  | 2.47496100  | -0.90481600 |
| H | -0.89557200 | 2.66303300  | -0.31379800 |
| H | 0.89557200  | 2.66303300  | -0.31379800 |
| H | 0.00000000  | 3.11102300  | -1.78601000 |
| I | 0.00000000  | 0.00000000  | 1.46056700  |

### cat1-Michael acceptor

Basis set superposition error correction = 0.000724842 Hartree

Electronic energy (in solution) = -1064.51776 Hartree

Entropic correction (in solution) = -1064.25769 Hartree

Sum of electronic and thermal Free Energies (in solution) = -1064.26775 Hartree

|   |             |             |             |
|---|-------------|-------------|-------------|
| C | 3.45311500  | 2.96260600  | 1.06969800  |
| C | 3.51763500  | 1.58572900  | 0.88068300  |
| C | 2.66659500  | 3.74594000  | 0.22918200  |
| C | 1.93281100  | 3.15284800  | -0.79739300 |
| C | 1.97664700  | 1.77614800  | -0.97340700 |
| C | 2.77172200  | 0.98542600  | -0.13718500 |
| C | 2.77080500  | -0.49460800 | -0.33640300 |
| H | 4.01878900  | 3.42357200  | 1.87081300  |
| H | 4.12841900  | 0.98109500  | 1.54110400  |
| H | 2.62722900  | 4.81990400  | 0.37153200  |
| H | 1.32890100  | 3.76440700  | -1.45755300 |
| H | 1.41429000  | 1.30608700  | -1.77227300 |
| O | 1.78067900  | -1.04539400 | -0.80579800 |
| C | 3.98424900  | -1.25235300 | 0.02981300  |
| C | 3.99346200  | -2.58981600 | 0.00623200  |
| C | 5.17069500  | -3.43628900 | 0.34067800  |
| H | 6.04116200  | -2.83572700 | 0.60658300  |
| H | 5.42240500  | -4.07720000 | -0.51003800 |
| H | 4.92717800  | -4.10499700 | 1.17198400  |
| H | 3.07687300  | -3.10406700 | -0.27594100 |
| H | 4.87407100  | -0.69747100 | 0.30608900  |
| H | -1.94019900 | 0.37605500  | 2.72401300  |
| H | -3.06282500 | 0.90645600  | -2.45101000 |
| C | -4.79970800 | 0.06304300  | 1.26046800  |
| C | -5.07279100 | 0.18244100  | -0.06364200 |

|   |             |             |             |
|---|-------------|-------------|-------------|
| C | -2.72868900 | -0.36981300 | 2.63337300  |
| H | -5.43584700 | 0.12197900  | 2.12772600  |
| N | -3.44832900 | -0.17203500 | 1.37517900  |
| H | -3.44347500 | -0.24910200 | 3.44332400  |
| C | -2.90803400 | -0.19622500 | 0.15167900  |
| H | -5.99533700 | 0.36827800  | -0.58783500 |
| N | -3.88376600 | 0.01786800  | -0.73825200 |
| C | -3.71806000 | 0.07579200  | -2.19118100 |
| H | -4.70053100 | 0.23121100  | -2.63002700 |
| H | -2.30693300 | -1.37388600 | 2.65947400  |
| H | -3.30039100 | -0.86444700 | -2.54854600 |
| I | -0.91806100 | -0.50368000 | -0.28711500 |

### COM1

Basis set superposition error correction = 0.002934667 Hartree

Electronic energy (in solution) = -1428.30674 Hartree

Entropic correction (in solution) = -1427.92546 Hartree

Sum of electronic and thermal Free Energies (in solution) = -1427.93545 Hartree

|   |             |             |             |
|---|-------------|-------------|-------------|
| C | 2.06130100  | 4.09555000  | 1.36736100  |
| C | 2.37050200  | 2.95375200  | 0.63537100  |
| C | 0.88410500  | 4.79312700  | 1.10881100  |
| C | 0.01023600  | 4.34710200  | 0.11861700  |
| C | 0.30818800  | 3.19694100  | -0.60073600 |
| C | 1.48901300  | 2.49150600  | -0.34647000 |
| C | 1.76080600  | 1.24304500  | -1.12329600 |
| H | 2.74005300  | 4.44137200  | 2.13820000  |
| H | 3.28495400  | 2.41282600  | 0.84909400  |
| H | 0.64962700  | 5.68749800  | 1.67495200  |
| H | -0.89932700 | 4.89739500  | -0.09244200 |
| H | -0.36021600 | 2.85145900  | -1.38099800 |
| O | 0.82874200  | 0.61569400  | -1.61598300 |
| C | 3.16255500  | 0.81812500  | -1.30130800 |
| C | 3.46100300  | -0.38482700 | -1.80638200 |
| C | 4.84629700  | -0.87139200 | -2.05543200 |
| H | 5.59431900  | -0.16193600 | -1.69873900 |
| H | 4.99272800  | -1.03130800 | -3.12904000 |
| H | 5.00654200  | -1.84002000 | -1.57380000 |
| C | 3.14573000  | -2.36623400 | 0.65189300  |
| C | 1.79150100  | -1.95933500 | 0.75838300  |
| C | 1.48261900  | -0.84519000 | 1.55855900  |
| C | 2.50781600  | -0.18234100 | 2.20990800  |
| C | 3.84871700  | -0.60615200 | 2.08670200  |
| C | 4.18559700  | -1.70132200 | 1.31121600  |
| H | 4.62759200  | -0.06268400 | 2.60974700  |
| H | 5.21355700  | -2.03071400 | 1.20836700  |

|   |             |             |             |
|---|-------------|-------------|-------------|
| H | 0.45699800  | -0.50724600 | 1.66304800  |
| H | 2.28143900  | 0.68139300  | 2.82508700  |
| C | 1.91286300  | -3.73431800 | -0.62387200 |
| N | 3.18498900  | -3.44448900 | -0.19652200 |
| H | 1.74142900  | -4.55778200 | -1.30051200 |
| H | 4.01699400  | -3.95412000 | -0.45945100 |
| H | 2.64104300  | -1.05440800 | -2.06342400 |
| C | 1.02538000  | -2.85395200 | -0.06540200 |
| H | -0.04149600 | -2.84769800 | -0.22634400 |
| H | 3.95031000  | 1.50739000  | -1.01786500 |
| H | -2.20544300 | -0.31306300 | 2.60823300  |
| H | -4.55681700 | 1.11545400  | -1.92525300 |
| C | -5.09651100 | -1.21016700 | 1.52630700  |
| C | -5.70683400 | -0.83804200 | 0.37244900  |
| C | -2.71443000 | -1.24483100 | 2.36374300  |
| H | -5.49250300 | -1.60898200 | 2.44512300  |
| N | -3.74770200 | -0.99023500 | 1.35932100  |
| H | -3.20562300 | -1.63775100 | 3.25031000  |
| C | -3.53873000 | -0.49557200 | 0.13405600  |
| H | -6.74335900 | -0.84626200 | 0.07972500  |
| N | -4.72184700 | -0.39545000 | -0.48169400 |
| C | -4.93709700 | 0.09813800  | -1.84181200 |
| H | -6.00752100 | 0.09011900  | -2.03060500 |
| H | -2.00468200 | -1.97815900 | 1.98166400  |
| H | -4.43247700 | -0.55506400 | -2.55276200 |
| I | -1.70660200 | 0.03257200  | -0.64819200 |

### Transition State1 (TS1)

Imaginary frequency -491.54 cm<sup>-1</sup>

Basis set superposition error correction = 0.003529659 Hartree

Electronic energy (in solution) = -1428.26646 Hartree

Entropic correction (in solution) = -1427.88104 Hartree

Sum of electronic and thermal Free Energies (in solution) = -1427.89105 Hartree

|   |             |            |             |
|---|-------------|------------|-------------|
| C | 0.35646800  | 4.00408100 | 2.29824800  |
| C | 1.00339800  | 3.13695600 | 1.42223300  |
| C | -0.77341700 | 4.70591200 | 1.88464800  |
| C | -1.25939800 | 4.52920400 | 0.59068400  |
| C | -0.61878000 | 3.65464100 | -0.28042600 |
| C | 0.52611200  | 2.95713800 | 0.11923300  |
| C | 1.16693900  | 2.01129900 | -0.86157900 |
| H | 0.73177800  | 4.12634300 | 3.30804800  |
| H | 1.87093700  | 2.58558300 | 1.76647000  |
| H | -1.27454800 | 5.38215700 | 2.56800900  |
| H | -2.13915500 | 5.07150400 | 0.26264400  |
| H | -0.99670000 | 3.50324600 | -1.28515500 |



|   |             |             |             |
|---|-------------|-------------|-------------|
| O | 0.42285600  | 1.52132600  | -1.77156300 |
| C | 2.51372200  | 1.68517600  | -0.72710100 |
| C | 3.13052800  | 0.73755000  | -1.60392400 |
| C | 4.61796600  | 0.53644000  | -1.44080800 |
| H | 4.85701200  | 0.14890700  | -0.44553500 |
| H | 5.11661300  | 1.50436800  | -1.54322500 |
| H | 5.03112400  | -0.13922700 | -2.19047100 |
| C | 3.39454100  | -2.29415600 | 0.22112500  |
| C | 2.42866000  | -1.27853600 | 0.14953300  |
| C | 1.89879000  | -0.76124800 | 1.33249300  |
| C | 2.34843800  | -1.28200600 | 2.54178000  |
| C | 3.31612600  | -2.29685200 | 2.58435200  |
| C | 3.86152800  | -2.82116500 | 1.41840200  |
| H | 3.64539700  | -2.67911200 | 3.54333700  |
| H | 4.61218500  | -3.60229300 | 1.43861700  |
| H | 1.14906800  | 0.02187600  | 1.31064400  |
| H | 1.94420700  | -0.89833200 | 3.47166100  |
| C | 3.05795800  | -1.88141100 | -1.95310700 |
| N | 3.74928700  | -2.61990100 | -1.09380000 |
| H | 3.19936400  | -1.99397700 | -3.01931300 |
| H | 4.45166700  | -3.30492400 | -1.35372700 |
| H | 2.78969100  | 0.77674400  | -2.63575700 |
| C | 2.25843600  | -0.93293200 | -1.26322100 |
| H | 1.32001700  | -0.58335300 | -1.67994300 |
| H | 3.08139200  | 2.04002700  | 0.12460600  |
| I | -1.55518500 | 0.03772900  | -0.78453100 |
| H | -1.32392200 | -1.08037500 | 2.32031900  |
| H | -4.84994100 | 0.24505600  | -1.43935000 |
| C | -3.92790300 | -2.72414700 | 1.37165300  |
| C | -4.82339200 | -2.38568000 | 0.40979600  |
| C | -1.55271500 | -2.06722800 | 1.91899200  |
| H | -3.99826500 | -3.40525700 | 2.20315900  |
| N | -2.78022400 | -2.00410400 | 1.12503400  |
| H | -1.72324400 | -2.76494200 | 2.73521100  |
| C | -2.96667700 | -1.24281200 | 0.03951000  |
| H | -5.83493100 | -2.71028900 | 0.23164100  |
| N | -4.20789400 | -1.46470500 | -0.40864000 |
| C | -4.81570300 | -0.83447400 | -1.58009900 |
| H | -5.82591500 | -1.22386600 | -1.67807100 |
| H | -0.73180600 | -2.42156500 | 1.29596000  |
| H | -4.23798200 | -1.08208900 | -2.46981800 |

## COM2

Basis set superposition error correction = 0.001580164 Hartree

Electronic energy (in solution) = -1428.27499 Hartree

Entropic correction (in solution) = -1427.88904 Hartree

Sum of electronic and thermal Free Energies (in solution) = -1427.89906 Hartree

|   |             |             |             |
|---|-------------|-------------|-------------|
| C | 0.02569500  | 4.41291200  | 2.24017200  |
| C | 0.76122900  | 3.49834700  | 1.49213000  |
| C | -1.12170200 | 4.99754100  | 1.70702300  |
| C | -1.53059300 | 4.65322600  | 0.42087900  |
| C | -0.79561000 | 3.73541500  | -0.32403300 |
| C | 0.36747700  | 3.15419500  | 0.19293100  |
| C | 1.12002200  | 2.16657300  | -0.66014400 |
| H | 0.34356800  | 4.66227000  | 3.24661500  |
| H | 1.63886400  | 3.03857800  | 1.93274200  |
| H | -1.69465900 | 5.70832200  | 2.29178400  |
| H | -2.42441000 | 5.09902500  | -0.00184800 |
| H | -1.11407300 | 3.45563500  | -1.32165300 |
| O | 0.43615200  | 1.57752800  | -1.60412900 |
| C | 2.44139700  | 1.92740100  | -0.42678900 |
| C | 3.22473800  | 0.91227300  | -1.20830300 |
| C | 4.67086300  | 0.81924500  | -0.72727000 |
| H | 4.71125500  | 0.53988700  | 0.32967700  |
| H | 5.16265200  | 1.78875900  | -0.83612400 |
| H | 5.24312900  | 0.08314600  | -1.29966900 |
| C | 3.00152700  | -2.45170600 | 0.04647600  |
| C | 2.44442700  | -1.17986300 | 0.18826200  |
| C | 1.95116200  | -0.80479100 | 1.43205200  |
| C | 2.04271100  | -1.71799400 | 2.48357600  |
| C | 2.59924000  | -2.98740600 | 2.30472100  |
| C | 3.09464800  | -3.38336900 | 1.06470600  |
| H | 2.64661400  | -3.67501400 | 3.14064000  |
| H | 3.52945900  | -4.36210000 | 0.90259000  |
| H | 1.50059900  | 0.16869800  | 1.58171300  |
| H | 1.66429700  | -1.43979800 | 3.46050900  |
| C | 3.17072600  | -1.50864200 | -1.98238000 |
| N | 3.42615200  | -2.57870400 | -1.30244800 |
| H | 3.43724600  | -1.42798200 | -3.02922200 |
| H | 3.87619700  | -3.41004600 | -1.68479100 |
| H | 3.21726500  | 1.16470300  | -2.27593200 |
| C | 2.51446400  | -0.48678300 | -1.14324400 |
| H | 1.51314200  | -0.29423600 | -1.56203500 |
| H | 2.96410100  | 2.46070600  | 0.35857900  |
| H | -0.94223400 | -1.61954500 | 2.12381100  |
| H | -4.66897800 | 0.34497300  | -1.08590200 |
| C | -3.60004700 | -3.08282600 | 1.08371000  |
| C | -4.56600200 | -2.58002200 | 0.27450800  |
| C | -1.18463200 | -2.51323800 | 1.54988000  |

|   |             |             |             |
|---|-------------|-------------|-------------|
| H | -3.61177300 | -3.89985300 | 1.78578300  |
| N | -2.46768700 | -2.32683200 | 0.87314000  |
| H | -1.27939800 | -3.36576900 | 2.21823800  |
| C | -2.72700100 | -1.38211000 | -0.04125500 |
| H | -5.59289200 | -2.86952800 | 0.12610900  |
| N | -4.00540400 | -1.52623400 | -0.41410900 |
| C | -4.69859300 | -0.69774200 | -1.39927200 |
| H | -5.73070000 | -1.03585800 | -1.45199500 |
| H | -0.40470000 | -2.70655300 | 0.81310500  |
| H | -4.22417900 | -0.81118300 | -2.37339200 |
| I | -1.34260200 | 0.03398300  | -0.75589400 |

**The indirect hydrogen proton transfer reaction pathway**

**Transition State2 TS2(a)**

Imaginary frequency -295.26 cm<sup>-1</sup>

Basis set superposition error correction = 0.001783451 Hartree

Electronic energy (in solution) = -1428.27153 Hartree

Entropic correction (in solution) = -1427.88584 Hartree

Sum of electronic and thermal Free Energies (in solution) = -1427.89586 Hartree

|   |             |             |             |
|---|-------------|-------------|-------------|
| C | 1.40359500  | 4.39054000  | 2.03682200  |
| C | 1.90703900  | 3.24124600  | 1.43571400  |
| C | 0.44976800  | 5.16715300  | 1.38128300  |
| C | 0.00048100  | 4.78207600  | 0.12055000  |
| C | 0.50268400  | 3.63078300  | -0.47898400 |
| C | 1.46964900  | 2.85070000  | 0.16444000  |
| C | 1.98635600  | 1.62530300  | -0.52314800 |
| H | 1.74844800  | 4.67495200  | 3.02481000  |
| H | 2.63281200  | 2.63539000  | 1.96685300  |
| H | 0.05635700  | 6.06073000  | 1.85251000  |
| H | -0.74278500 | 5.37895300  | -0.39657900 |
| H | 0.15329700  | 3.32602200  | -1.45891900 |
| O | 1.17505600  | 1.06546500  | -1.40529300 |
| C | 3.21788600  | 1.12138400  | -0.25430900 |
| C | 3.70401900  | -0.14378700 | -0.91143100 |
| C | 4.92678000  | -0.73034100 | -0.20987300 |
| H | 4.70007100  | -0.96336900 | 0.83422900  |
| H | 5.75025600  | -0.01171400 | -0.22471800 |
| H | 5.25953100  | -1.64684500 | -0.70443700 |
| C | 1.69069100  | -3.16213200 | -0.13458400 |
| C | 2.01215700  | -1.84928600 | 0.22895700  |
| C | 1.76995500  | -1.43941800 | 1.53999200  |
| C | 1.23019400  | -2.36043800 | 2.43264500  |
| C | 0.91283600  | -3.66730100 | 2.03634600  |
| C | 1.13503600  | -4.09305500 | 0.73288700  |
| H | 0.48551000  | -4.35551100 | 2.75619200  |

|   |             |             |             |
|---|-------------|-------------|-------------|
| H | 0.89482000  | -5.09787100 | 0.40664500  |
| H | 2.00176200  | -0.42943000 | 1.85706200  |
| H | 1.04505100  | -2.06055200 | 3.45779400  |
| C | 2.56556700  | -2.21629200 | -1.96577400 |
| N | 2.04736200  | -3.32039700 | -1.48705900 |
| H | 2.91063400  | -2.15792100 | -2.99013400 |
| H | 1.90474800  | -4.17204400 | -2.02416600 |
| H | 3.96381000  | 0.05557700  | -1.95990500 |
| C | 2.54015800  | -1.16541300 | -0.98016200 |
| H | 1.71102400  | -0.40061000 | -1.36916000 |
| H | 3.87187500  | 1.61432700  | 0.45511200  |
| I | -1.18421500 | 0.32131000  | -0.64278900 |
| H | -1.63933200 | -1.53884600 | 2.15328100  |
| H | -4.03347800 | 1.99391400  | -1.01826200 |
| C | -4.57962500 | -1.68547400 | 0.92831800  |
| C | -5.21675900 | -0.77968500 | 0.14373700  |
| C | -2.16549100 | -2.20020000 | 1.46530000  |
| H | -4.95749700 | -2.46496800 | 1.56852800  |
| N | -3.22868300 | -1.45841400 | 0.78787900  |
| H | -2.62702600 | -3.01612600 | 2.01651900  |
| C | -3.03857000 | -0.43887900 | -0.05910200 |
| H | -6.26404300 | -0.60750700 | -0.04046800 |
| N | -4.24335800 | -0.01463600 | -0.46013900 |
| C | -4.48817900 | 1.07995100  | -1.39793500 |
| H | -5.56415900 | 1.21215600  | -1.48073300 |
| H | -1.47248400 | -2.60014500 | 0.72547100  |
| H | -4.07087000 | 0.82779200  | -2.37224700 |

**COM3(a)**

Basis set superposition error correction = 0.001395283 Hartree

Electronic energy (in solution) = -1428.31823 Hartree

Entropic correction (in solution) = -1427.93245 Hartree

Sum of electronic and thermal Free Energies (in solution) = -1427.94249 Hartree

|   |             |            |             |
|---|-------------|------------|-------------|
| C | -0.17499600 | 4.29821800 | 1.74754300  |
| C | 0.76875300  | 3.34207000 | 1.38835200  |
| C | -1.06391300 | 4.79943600 | 0.79889100  |
| C | -1.00305800 | 4.33719400 | -0.51333100 |
| C | -0.05937000 | 3.38158600 | -0.87589500 |
| C | 0.84320500  | 2.88155300 | 0.06955900  |
| C | 1.84033300  | 1.86120100 | -0.33375000 |
| H | -0.22545000 | 4.64212500 | 2.77435600  |
| H | 1.43607800  | 2.93605800 | 2.14027600  |
| H | -1.80239500 | 5.54045100 | 1.08266800  |
| H | -1.69228700 | 4.72043800 | -1.25742100 |
| H | -0.01775100 | 3.02141300 | -1.89707900 |

|   |             |             |             |
|---|-------------|-------------|-------------|
| O | 1.37570600  | 1.08532700  | -1.36830700 |
| C | 3.04940600  | 1.72388300  | 0.22397100  |
| C | 4.10883800  | 0.70199600  | -0.13968000 |
| C | 5.12621600  | 0.58268000  | 1.00460100  |
| H | 4.64231000  | 0.21410700  | 1.91296300  |
| H | 5.57102000  | 1.55648500  | 1.22439500  |
| H | 5.92476500  | -0.11085800 | 0.73364800  |
| C | 2.38855700  | -2.63862500 | -0.40881500 |
| C | 2.65014400  | -1.45323900 | 0.32137600  |
| C | 2.05558300  | -1.28549700 | 1.58471200  |
| C | 1.24041800  | -2.28919600 | 2.07763200  |
| C | 0.99880000  | -3.46334400 | 1.33405800  |
| C | 1.56192100  | -3.65419900 | 0.08480600  |
| H | 0.35507200  | -4.23121600 | 1.74901800  |
| H | 1.37728900  | -4.55439700 | -0.49060500 |
| H | 2.23559100  | -0.38494700 | 2.16233400  |
| H | 0.77630400  | -2.17503700 | 3.05094900  |
| C | 3.75852700  | -1.36311800 | -1.63727500 |
| N | 3.07570200  | -2.55470200 | -1.59375800 |
| H | 4.36251900  | -1.10668500 | -2.49576200 |
| H | 3.07977700  | -3.25516900 | -2.32175400 |
| H | 4.64671200  | 1.06078700  | -1.02673900 |
| C | 3.53307400  | -0.64775200 | -0.48840400 |
| H | 2.04871600  | 0.42686600  | -1.60606900 |
| H | 3.31082400  | 2.43830100  | 0.99721200  |
| H | -1.76301000 | -2.71307500 | 1.66290500  |
| H | -3.66296500 | 1.90711700  | -0.18395300 |
| C | -4.69875300 | -2.06411500 | 0.62501600  |
| C | -5.19302300 | -0.88534000 | 0.16804400  |
| C | -2.39778700 | -3.07443400 | 0.85478200  |
| H | -5.18703300 | -2.92620700 | 1.04755300  |
| N | -3.33268500 | -2.01938500 | 0.46461700  |
| H | -2.98336700 | -3.92547000 | 1.19412300  |
| C | -2.99962300 | -0.84266400 | -0.07596400 |
| H | -6.20090400 | -0.50994700 | 0.10995800  |
| N | -4.12146900 | -0.13770400 | -0.26381900 |
| C | -4.20302200 | 1.21101300  | -0.82526500 |
| H | -5.25405900 | 1.48541000  | -0.86562200 |
| H | -1.79136900 | -3.36087100 | -0.00362900 |
| H | -3.78198900 | 1.21520800  | -1.82981400 |
| I | -1.10457100 | -0.19560000 | -0.54861300 |

**P(a)**

Electronic energy (in solution) = -826.02488 Hartree

Entropic correction (in solution) = -825.75379 Hartree

Sum of electronic and thermal Free Energies (in solution) = -825.76408 Hartree

|   |             |             |             |
|---|-------------|-------------|-------------|
| C | 4.33669500  | 0.97037700  | 1.07980100  |
| C | 3.07707500  | 0.38724600  | 1.01252500  |
| C | 5.13564200  | 1.05369200  | -0.05932600 |
| C | 4.66048600  | 0.55365200  | -1.26798600 |
| C | 3.39948700  | -0.03162500 | -1.33825900 |
| C | 2.59793300  | -0.13300600 | -0.19596000 |
| C | 1.26744500  | -0.78211400 | -0.28457600 |
| H | 4.69087400  | 1.37223100  | 2.02232900  |
| H | 2.45690000  | 0.35367900  | 1.90081400  |
| H | 6.11628800  | 1.51235400  | -0.00533700 |
| H | 5.27178700  | 0.61789200  | -2.16108500 |
| H | 3.03469300  | -0.41940100 | -2.28143100 |
| O | 0.76767200  | -0.75285700 | -1.55447400 |
| C | 0.63980900  | -1.35905800 | 0.74927100  |
| C | -0.71634800 | -2.03525500 | 0.69035000  |
| C | -1.18813100 | -2.38179200 | 2.10906700  |
| H | -1.32422500 | -1.47174100 | 2.69985100  |
| H | -0.45171200 | -3.01137700 | 2.61509900  |
| H | -2.13940300 | -2.91668900 | 2.07669100  |
| C | -3.13586900 | 0.51509000  | -0.66811800 |
| C | -2.10103200 | 0.17030700  | 0.23567600  |
| C | -1.63636300 | 1.14078300  | 1.14124100  |
| C | -2.20764300 | 2.40130500  | 1.12198400  |
| C | -3.23794200 | 2.72131700  | 0.21296000  |
| C | -3.71543400 | 1.78859000  | -0.69088200 |
| H | -3.66322200 | 3.71846700  | 0.22298300  |
| H | -4.50643700 | 2.03008300  | -1.39177000 |
| H | -0.84287300 | 0.90389300  | 1.84195100  |
| H | -1.85981300 | 3.15940900  | 1.81434500  |
| C | -2.56509000 | -1.61511900 | -1.05404300 |
| N | -3.39789900 | -0.59086500 | -1.43696800 |
| H | -2.61540400 | -2.57631000 | -1.54521600 |
| H | -4.08174500 | -0.64261500 | -2.17871400 |
| H | -0.61722200 | -2.97514800 | 0.13104600  |
| C | -1.75011200 | -1.20392800 | -0.03027000 |
| H | -0.13795000 | -1.09660600 | -1.55351900 |
| H | 1.14972500  | -1.36198500 | 1.70581700  |

**The direct hydrogen proton transfer reaction pathway**

**Transition State2 TS2(b)**

Imaginary frequency -1443.85cm<sup>-1</sup>

Basis set superposition error correction = 0.001283043 Hartree

Electronic energy (in solution) = -1428.23467 Hartree

Entropic correction (in solution) = -1427.85247 Hartree

Sum of electronic and thermal Free Energies (in solution) = -1427.86245 Hartree

|   |             |             |             |
|---|-------------|-------------|-------------|
| C | -0.88778900 | 3.98202600  | 2.30498500  |
| C | 0.05757700  | 3.30163100  | 1.54332500  |
| C | -2.08488900 | 4.40087100  | 1.72789400  |
| C | -2.33490700 | 4.12927200  | 0.38459900  |
| C | -1.39378400 | 3.44024600  | -0.37372300 |
| C | -0.18508200 | 3.02630000  | 0.19397200  |
| C | 0.79009300  | 2.27851600  | -0.67564100 |
| H | -0.69205400 | 4.17962300  | 3.35289600  |
| H | 0.97668700  | 2.96509100  | 2.00956700  |
| H | -2.81946000 | 4.93196500  | 2.32262800  |
| H | -3.26374600 | 4.45324200  | -0.07151800 |
| H | -1.58571300 | 3.21606400  | -1.41701400 |
| O | 0.32264500  | 1.58977700  | -1.63604800 |
| C | 2.15210500  | 2.31816600  | -0.36339600 |
| C | 3.16132300  | 1.56054100  | -1.22660200 |
| C | 4.59053600  | 2.03940100  | -1.02073200 |
| H | 4.83827500  | 2.11049900  | 0.03999600  |
| H | 4.70447700  | 3.03712100  | -1.45158100 |
| H | 5.30837900  | 1.37187000  | -1.50252600 |
| C | 3.03865000  | -2.03512100 | 0.04397100  |
| C | 3.62065700  | -0.75900100 | 0.16726700  |
| C | 4.62152800  | -0.57038400 | 1.12632200  |
| C | 5.01210400  | -1.65287100 | 1.90333800  |
| C | 4.41118200  | -2.91363100 | 1.76164300  |
| C | 3.40599600  | -3.12309800 | 0.83030600  |
| H | 4.73658600  | -3.73413300 | 2.39012400  |
| H | 2.92468200  | -4.08684400 | 0.71167700  |
| H | 5.09005600  | 0.39432200  | 1.26807100  |
| H | 5.79619400  | -1.52106600 | 2.63975500  |
| C | 2.01138000  | -0.74037800 | -1.46447900 |
| N | 2.07665100  | -1.97170900 | -0.96017700 |
| H | 1.36018700  | -0.49021200 | -2.28733900 |
| H | 1.49516000  | -2.74886400 | -1.25466600 |
| H | 2.89641900  | 1.63365600  | -2.28559600 |
| C | 2.88655800  | 0.12476900  | -0.76066900 |
| H | 2.06566700  | 0.76455600  | 0.03826800  |
| H | 2.52306600  | 3.01624300  | 0.37904900  |
| H | -0.38454700 | -3.09372900 | 0.50846500  |
| H | -4.22458300 | 0.52552900  | 0.94513400  |
| C | -3.54792900 | -3.60616100 | 0.71593600  |
| C | -4.53498800 | -2.68299900 | 0.83876700  |
| C | -1.15754100 | -3.57627300 | -0.08963300 |
| H | -3.52123100 | -4.65680800 | 0.95191000  |

|   |             |             |             |
|---|-------------|-------------|-------------|
| N | -2.45241700 | -2.95719000 | 0.19160600  |
| H | -1.22852800 | -4.62680600 | 0.18079500  |
| C | -2.75991700 | -1.66893200 | -0.00373900 |
| H | -5.54588500 | -2.76425300 | 1.20171000  |
| N | -4.02636300 | -1.48556700 | 0.38775200  |
| C | -4.75502400 | -0.21778500 | 0.35068800  |
| H | -5.74119200 | -0.39016800 | 0.77495600  |
| H | -0.92957200 | -3.48447500 | -1.15127900 |
| H | -4.85164200 | 0.12124400  | -0.68003100 |
| I | -1.47926400 | -0.21266500 | -0.74237200 |

### COM3(b)

Basis set superposition error correction = 0.000724999 Hartree

Electronic energy (in solution) = -1428.33471 Hartree

Entropic correction (in solution) = -1427.94704 Hartree

Sum of electronic and thermal Free Energies (in solution) = -1427.95707 Hartree

|   |             |             |             |
|---|-------------|-------------|-------------|
| C | -0.84744600 | 1.78784800  | -0.69212100 |
| C | -0.86466200 | 0.75719100  | -1.85602000 |
| H | -1.57521300 | 1.09687800  | -2.61013700 |
| C | -1.19182000 | -0.62898400 | -1.35433400 |
| C | 4.24932000  | -0.04725600 | 0.17933000  |
| N | 5.26379100  | -0.85636300 | 0.50265000  |
| I | 2.33775800  | -0.62574500 | -0.33300900 |
| C | 5.20681300  | -2.31694300 | 0.55984000  |
| H | 6.19103600  | -2.67358400 | 0.85223700  |
| H | 4.94877000  | -2.71139400 | -0.42227400 |
| H | 4.46863500  | -2.62452400 | 1.29939300  |
| O | -0.29412500 | -1.34282800 | -0.92891200 |
| H | 6.56765100  | 2.12348800  | 0.73485800  |
| C | 6.01129400  | 1.20846000  | 0.61915700  |
| C | 6.37294200  | -0.09002700 | 0.78076000  |
| N | 4.68628100  | 1.21537900  | 0.24621200  |
| H | 7.30922200  | -0.53966800 | 1.06635900  |
| H | -0.07953200 | 1.46550900  | 0.02016100  |
| C | -0.45677000 | 3.15725000  | -1.24462900 |
| H | -0.38979100 | 3.89303300  | -0.44017800 |
| H | 0.51125700  | 3.10534100  | -1.74957400 |
| H | -1.19678700 | 3.50791100  | -1.96961200 |
| C | -2.60655600 | -1.10765600 | -1.28890600 |
| C | -2.88675600 | -2.21274600 | -0.47545400 |
| C | -3.65455400 | -0.45523100 | -1.94482800 |
| C | -4.19423200 | -2.64411800 | -0.30221600 |
| H | -2.07096200 | -2.70865900 | 0.03690500  |
| C | -4.96449100 | -0.89585500 | -1.77836600 |
| H | -3.46458900 | 0.39625100  | -2.58501200 |



|   |             |             |             |
|---|-------------|-------------|-------------|
| C | -5.23658700 | -1.98157100 | -0.95116600 |
| H | -4.40498300 | -3.48935600 | 0.34276500  |
| H | -5.77210400 | -0.38563500 | -2.29030300 |
| H | -6.25929400 | -2.31382900 | -0.81235700 |
| C | -2.52858000 | 0.95380500  | 1.13541500  |
| C | -3.90836900 | 1.15670900  | 1.38478900  |
| C | -4.59785100 | 0.45335000  | 2.37923800  |
| C | -3.87682800 | -0.46122000 | 3.12802300  |
| C | -2.49983900 | -0.67261900 | 2.90224300  |
| C | -1.82264800 | 0.02281800  | 1.91599800  |
| C | -2.16657700 | 1.80212400  | 0.03016400  |
| C | -3.30495000 | 2.48028800  | -0.31991900 |
| H | -5.65565300 | 0.61846000  | 2.55046800  |
| H | -4.37975400 | -1.02598500 | 3.90488100  |
| H | -1.97015700 | -1.39732900 | 3.51023500  |
| H | -0.76621500 | -0.15535200 | 1.73919500  |
| H | 0.12802700  | 0.71716800  | -2.31137500 |
| H | -3.46590100 | 3.20412300  | -1.10535600 |
| H | -5.28944400 | 2.46386200  | 0.43852200  |
| N | -4.35012400 | 2.09534900  | 0.48776100  |
| C | 3.89288900  | 2.40933000  | -0.04601800 |
| H | 3.60101600  | 2.40585100  | -1.09579400 |
| H | 3.01060400  | 2.42741300  | 0.59293400  |
| H | 4.51390000  | 3.27691700  | 0.16157600  |

### 2.1.3 Cat2 ((C<sub>4</sub>H<sub>5</sub>N<sub>2</sub>I<sup>+</sup>)<sub>2</sub>C<sub>6</sub>H<sub>4</sub>) catalyzed reaction

#### cat2 ((C<sub>4</sub>H<sub>5</sub>N<sub>2</sub>I<sup>+</sup>)<sub>2</sub>C<sub>6</sub>H<sub>4</sub>)

Electronic energy (in solution) = -1355.76028 Hartree

Entropic correction (in solution) = -1355.53587 Hartree

Sum of electronic and thermal Free Energies (in solution) = -1355.54598 Hartree

|   |             |             |             |
|---|-------------|-------------|-------------|
| C | 0.00000000  | 1.40679200  | 0.23094300  |
| C | 0.00000000  | 0.26634100  | 2.78862200  |
| C | 1.18514500  | 1.11576500  | 0.88997100  |
| C | -1.18514500 | 1.11576500  | 0.88997000  |
| C | -1.20613800 | 0.55227600  | 2.15916000  |
| C | 1.20613700  | 0.55227600  | 2.15916100  |
| H | -2.15169600 | 0.35224500  | 2.65001200  |
| H | 2.15169500  | 0.35224500  | 2.65001300  |
| C | 3.31395500  | 0.51709500  | -0.23251400 |
| N | 4.32000500  | 1.18358300  | -0.79740600 |
| C | -3.31395500 | 0.51709500  | -0.23251400 |
| N | -4.32000400 | 1.18358400  | -0.79740700 |
| I | 3.13876300  | -1.51918400 | -0.13727900 |
| I | -3.13876400 | -1.51918400 | -0.13727800 |

|   |             |             |             |
|---|-------------|-------------|-------------|
| C | 5.50335500  | 0.58847800  | -1.42424700 |
| H | 6.13694200  | 1.40363400  | -1.76326600 |
| H | 5.19735000  | -0.02096200 | -2.27370800 |
| H | 6.03730400  | -0.01387100 | -0.69058500 |
| C | -5.50335400 | 0.58847900  | -1.42424800 |
| H | -6.13694100 | 1.40363500  | -1.76326800 |
| H | -6.03730400 | -0.01387100 | -0.69058700 |
| H | -5.19735000 | -0.02096100 | -2.27371000 |
| H | -0.00000100 | -0.16706500 | 3.78047600  |
| C | 2.87898200  | 2.68277900  | -0.07060700 |
| C | 4.06619600  | 2.53519700  | -0.70743400 |
| C | -2.87898100 | 2.68277900  | -0.07060800 |
| C | -4.06619400 | 2.53519800  | -0.70743800 |
| N | 2.42292300  | 1.41254500  | 0.22427600  |
| N | -2.42292200 | 1.41254600  | 0.22427400  |
| H | 0.00000100  | 1.83445200  | -0.76515300 |
| H | 4.75819100  | 3.26163700  | -1.09992600 |
| H | 2.31901900  | 3.55852400  | 0.21284300  |
| H | -2.31901900 | 3.55852400  | 0.21284300  |
| H | -4.75818700 | 3.26163700  | -1.09993300 |

### cat2 -Michael acceptor

Basis set superposition error correction = 0.001242622 Hartree

Electronic energy (in solution) = -1818.00939 Hartree

Entropic correction (in solution) = -1817.62893 Hartree

Sum of electronic and thermal Free Energies (in solution) = -1817.63873 Hartree

|   |             |             |             |
|---|-------------|-------------|-------------|
| C | -2.13117000 | -3.27555200 | 1.92257700  |
| C | -3.11364200 | -2.85914300 | 1.11505600  |
| H | -4.01938300 | -3.44334900 | 0.99516800  |
| C | -3.00647100 | -1.58007300 | 0.39177000  |
| H | 2.30796400  | 1.05859900  | -1.08466700 |
| C | 2.69824900  | 1.10191300  | -0.07375400 |
| C | 3.80760600  | 1.25833300  | 2.49464300  |
| C | 3.46673800  | 0.06752900  | 0.44475500  |
| C | 2.47481600  | 2.20378300  | 0.74195500  |
| C | 3.01920400  | 2.29824800  | 2.01655300  |
| C | 4.02799500  | 0.13012600  | 1.71337100  |
| H | 2.82035300  | 3.17490200  | 2.62193700  |
| H | 4.62265500  | -0.69864300 | 2.07937500  |
| C | 2.78727800  | -2.00477000 | -0.74266000 |
| N | 3.41734900  | -2.96199300 | -1.42326600 |
| C | 0.36829500  | 3.26460000  | -0.04710800 |
| N | 0.00574800  | 4.49141100  | -0.42172400 |
| I | 0.77471900  | -1.90900300 | -0.32889700 |
| I | -0.85053000 | 1.61083100  | 0.05776500  |

|   |             |             |             |
|---|-------------|-------------|-------------|
| C | 2.78628600  | -4.13868700 | -2.02565300 |
| H | 3.56717800  | -4.71488100 | -2.51486900 |
| H | 2.04802600  | -3.81837000 | -2.75951700 |
| H | 2.31709600  | -4.73811400 | -1.24653500 |
| C | -1.33911300 | 4.89406300  | -0.84059800 |
| H | -1.30332400 | 5.95217300  | -1.08587900 |
| H | -2.03964900 | 4.72682400  | -0.02355900 |
| H | -1.63166700 | 4.32032300  | -1.71905600 |
| O | -1.91511100 | -1.04811500 | 0.18465900  |
| H | 4.23689600  | 1.31962600  | 3.48649900  |
| H | 5.83791800  | -0.93681700 | -0.58752800 |
| H | 3.17858300  | 4.83882700  | 0.26222500  |
| C | 4.95190800  | -1.51509600 | -0.79084500 |
| C | 4.76559900  | -2.67612300 | -1.46358800 |
| C | 2.14758700  | 4.58632600  | 0.07801700  |
| C | 1.09841000  | 5.32913200  | -0.34900600 |
| N | 3.70741800  | -1.10347200 | -0.35222300 |
| N | 1.67930400  | 3.29761500  | 0.25647000  |
| H | 5.46145800  | -3.32418000 | -1.96992000 |
| H | 1.02442300  | 6.37078200  | -0.61397100 |
| H | -1.26021400 | -2.63525900 | 2.05098600  |
| C | -2.14662100 | -4.54772900 | 2.69361400  |
| H | -2.06788100 | -4.33817900 | 3.76461700  |
| H | -3.05180200 | -5.12560000 | 2.50529200  |
| H | -1.27235200 | -5.15089100 | 2.42917700  |
| C | -4.24889700 | -0.92495400 | -0.09992200 |
| C | -4.16327700 | -0.03321000 | -1.17479400 |
| C | -5.48440500 | -1.16176800 | 0.50965900  |
| C | -5.30199600 | 0.61226500  | -1.63652500 |
| H | -3.20691300 | 0.12868600  | -1.65930900 |
| C | -6.61979700 | -0.49831700 | 0.05709900  |
| H | -5.55814400 | -1.84317200 | 1.34932000  |
| C | -6.53000000 | 0.38384900  | -1.01629800 |
| H | -5.23647000 | 1.29047100  | -2.47917800 |
| H | -7.57380100 | -0.67137100 | 0.54086800  |
| H | -7.41833700 | 0.89223800  | -1.37348700 |

### COM1

Basis set superposition error correction = 0.004371735 Hartree

Electronic energy (in solution) = -2181.80182 Hartree

Entropic correction (in solution) = -2181.29794 Hartree

Sum of electronic and thermal Free Energies (in solution) = -2181.30776 Hartree

|   |             |             |             |
|---|-------------|-------------|-------------|
| C | -2.00865300 | -3.17465300 | -1.36931900 |
| C | -2.72342500 | -2.04360900 | -1.32482700 |
| H | -3.73812100 | -2.05036100 | -0.94257400 |

|   |             |             |             |
|---|-------------|-------------|-------------|
| C | -2.17131900 | -0.77639600 | -1.82795800 |
| H | 3.00837300  | 1.41255600  | 0.04000400  |
| C | 2.73509400  | 0.96937100  | 0.99158200  |
| C | 2.12226800  | -0.13812000 | 3.49253500  |
| C | 3.13616100  | -0.31713400 | 1.32882300  |
| C | 2.00656700  | 1.67940700  | 1.93640200  |
| C | 1.69538100  | 1.14748600  | 3.18193300  |
| C | 2.84119400  | -0.88167700 | 2.56301600  |
| H | 1.12570200  | 1.73690000  | 3.89088100  |
| H | 3.17133200  | -1.88991800 | 2.78537500  |
| C | 3.47514400  | -1.54315400 | -0.80131700 |
| N | 4.47842800  | -2.21986200 | -1.36082500 |
| C | 0.68405100  | 3.40664300  | 0.72924000  |
| N | 0.58365900  | 4.73507000  | 0.77985900  |
| I | 1.57841100  | -1.29686300 | -1.56204500 |
| I | -0.42849800 | 2.19629300  | -0.50136900 |
| C | 4.43037200  | -2.89594700 | -2.65919600 |
| H | 5.40125700  | -3.35481400 | -2.82804400 |
| H | 4.22473700  | -2.16613200 | -3.44080600 |
| H | 3.65768200  | -3.66360700 | -2.64008400 |
| C | -0.30699400 | 5.55773200  | -0.04304800 |
| H | -0.15775000 | 6.59368600  | 0.24872400  |
| H | -1.34082600 | 5.26725100  | 0.14012600  |
| H | -0.05342600 | 5.42764700  | -1.09428200 |
| O | -1.02715700 | -0.67486400 | -2.26534700 |
| H | 1.88252100  | -0.56776000 | 4.45693400  |
| H | 5.75704400  | -1.21808400 | 1.47152200  |
| H | 2.82412700  | 4.07114700  | 3.05903700  |
| C | 5.21303000  | -1.48509600 | 0.58072600  |
| C | 5.56840700  | -2.19600300 | -0.51628700 |
| C | 2.07594700  | 4.14746500  | 2.28740700  |
| C | 1.44257900  | 5.21535900  | 1.74477100  |
| N | 3.90555700  | -1.08002400 | 0.38611900  |
| N | 1.59573600  | 3.02449300  | 1.63974700  |
| H | 6.49256500  | -2.68360800 | -0.77865400 |
| H | 1.52251700  | 6.27013100  | 1.94960800  |
| H | -1.00197800 | -3.13639100 | -1.78104700 |
| C | -2.49917200 | -4.50495600 | -0.91969700 |
| H | -1.79952700 | -4.94048300 | -0.20030200 |
| H | -3.48875600 | -4.43979500 | -0.46485700 |
| H | -2.53910000 | -5.19038000 | -1.77309000 |
| C | -3.04132600 | 0.43940000  | -1.82498400 |
| C | -2.79293500 | 1.43738000  | -2.77531200 |
| C | -4.03982300 | 0.62923800  | -0.86479100 |

|   |             |             |             |
|---|-------------|-------------|-------------|
| C | -3.53536200 | 2.61156600  | -2.76414700 |
| H | -2.02117000 | 1.27962200  | -3.52057200 |
| C | -4.75972900 | 1.81897500  | -0.83858500 |
| H | -4.23973600 | -0.13486400 | -0.12283300 |
| C | -4.51115300 | 2.80733400  | -1.78838400 |
| H | -3.35032200 | 3.37572000  | -3.50995200 |
| H | -5.51832000 | 1.97220200  | -0.07999000 |
| H | -5.08245200 | 3.72842300  | -1.77186300 |
| C | -1.97813700 | -2.90808800 | 2.15475000  |
| C | -2.78669600 | -1.75169800 | 2.02541800  |
| C | -4.16607100 | -1.77237800 | 2.25994800  |
| C | -4.73083100 | -2.98144800 | 2.62796000  |
| C | -3.94510500 | -4.14521200 | 2.76653200  |
| C | -2.58124900 | -4.11916300 | 2.53586300  |
| C | -0.63472200 | -2.51422700 | 1.82981200  |
| C | -0.67699200 | -1.17837400 | 1.53383000  |
| H | -4.76493700 | -0.87398600 | 2.15891800  |
| H | -5.79681800 | -3.03490100 | 2.81767500  |
| H | -4.42362000 | -5.07316600 | 3.05837800  |
| H | -1.98508800 | -5.01940100 | 2.64104500  |
| H | 0.24669700  | -3.13835300 | 1.81959000  |
| H | 0.12278100  | -0.50681800 | 1.25850300  |
| H | -2.26044000 | 0.24119600  | 1.51376000  |
| N | -1.96653300 | -0.71749100 | 1.64173600  |

### Transition State1 (TS1)

Imaginary frequency -431.05 cm<sup>-1</sup>

Basis set superposition error correction = 0.004505637 Hartree

Electronic energy (in solution) = -2181.76846 Hartree

Entropic correction (in solution) = -2181.26110 Hartree

Sum of electronic and thermal Free Energies (in solution) = -2181.27081 Hartree

|   |             |             |             |
|---|-------------|-------------|-------------|
| C | 2.77719800  | -2.45117100 | -0.24307200 |
| C | 3.20032800  | -1.44757300 | 0.68051200  |
| H | 4.21825400  | -1.47006400 | 1.05196000  |
| C | 2.35133800  | -0.41029400 | 1.04488900  |
| H | -3.53049200 | 0.53288300  | 0.59011400  |
| C | -3.65702700 | 0.33418700  | -0.46842500 |
| C | -4.10328400 | -0.15785000 | -3.18908400 |
| C | -3.96472300 | -0.94015900 | -0.92862700 |
| C | -3.54115200 | 1.34805300  | -1.41125100 |
| C | -3.76270700 | 1.12082800  | -2.76386800 |
| C | -4.19420500 | -1.19991100 | -2.27366700 |
| H | -3.66210600 | 1.93766000  | -3.46899800 |
| H | -4.43321300 | -2.20740800 | -2.59347400 |
| C | -3.05707400 | -2.53818000 | 0.74280000  |

|   |             |             |             |
|---|-------------|-------------|-------------|
| N | -3.55151100 | -3.55620700 | 1.44765900  |
| C | -2.03875600 | 3.06137100  | -0.41825500 |
| N | -2.10272300 | 4.37934500  | -0.22593400 |
| I | -1.11016300 | -1.84166400 | 0.75189800  |
| I | -0.46863400 | 1.80627700  | 0.07659300  |
| C | -2.79314400 | -4.38710900 | 2.38514500  |
| H | -3.47896000 | -5.11682600 | 2.80808100  |
| H | -2.38619500 | -3.76033000 | 3.17759600  |
| H | -1.99145200 | -4.89717600 | 1.85276900  |
| C | -1.04953600 | 5.20330500  | 0.37048900  |
| H | -1.41552600 | 6.22581700  | 0.40914500  |
| H | -0.15422500 | 5.15354600  | -0.24779400 |
| H | -0.83713300 | 4.84868400  | 1.37823500  |
| O | 1.14296300  | -0.31996400 | 0.62913100  |
| H | -4.27883900 | -0.34717400 | -4.24047900 |
| H | -6.14224200 | -2.51636500 | -0.24433000 |
| H | -4.98118500 | 3.70864700  | -1.61011800 |
| C | -5.21301500 | -2.75659200 | 0.24519200  |
| C | -4.88982200 | -3.71044800 | 1.15084100  |
| C | -4.00148200 | 3.78921700  | -1.16937700 |
| C | -3.31345700 | 4.85171500  | -0.68759800 |
| N | -4.06282800 | -2.02714600 | 0.00593600  |
| N | -3.19796000 | 2.67775500  | -0.98870600 |
| H | -5.48318300 | -4.47947300 | 1.61673700  |
| H | -3.57072900 | 5.89592300  | -0.62338400 |
| H | 1.70141900  | -2.58807600 | -0.30888400 |
| C | 3.55078300  | -3.74886700 | -0.25424300 |
| H | 3.30070500  | -4.37480500 | -1.11183200 |
| H | 4.62731200  | -3.56848400 | -0.24175000 |
| H | 3.29433800  | -4.30081200 | 0.65526200  |
| C | 2.84040300  | 0.66414000  | 1.96908800  |
| C | 1.93567900  | 1.25799700  | 2.85468200  |
| C | 4.16831400  | 1.10257800  | 1.95798700  |
| C | 2.35163900  | 2.26173000  | 3.72317700  |
| H | 0.90745100  | 0.91276700  | 2.86858500  |
| C | 4.58151500  | 2.11540400  | 2.81861500  |
| H | 4.87578900  | 0.66406200  | 1.26217600  |
| C | 3.67582700  | 2.69534100  | 3.70433300  |
| H | 1.64448300  | 2.70508500  | 4.41525600  |
| H | 5.61053900  | 2.45586000  | 2.79421200  |
| H | 4.00035000  | 3.48223500  | 4.37574200  |
| C | 4.38094400  | -1.40689100 | -2.13759600 |
| C | 4.37737500  | -0.03020200 | -1.87381300 |
| C | 5.53474600  | 0.72755000  | -1.74655200 |

|   |            |             |             |
|---|------------|-------------|-------------|
| C | 6.73943900 | 0.05255600  | -1.90210400 |
| C | 6.77156700 | -1.32315700 | -2.17443700 |
| C | 5.60039900 | -2.06546600 | -2.28727700 |
| C | 2.98474400 | -1.84995100 | -2.07311200 |
| C | 2.22591400 | -0.64921100 | -2.01305200 |
| H | 5.49520500 | 1.79016500  | -1.53795600 |
| H | 7.67049000 | 0.60058300  | -1.81760900 |
| H | 7.72902400 | -1.81495200 | -2.30094100 |
| H | 5.63546100 | -3.12877000 | -2.49493700 |
| H | 2.60394700 | -2.73098000 | -2.57137600 |
| H | 1.15343000 | -0.52344900 | -2.03075600 |
| H | 2.74052900 | 1.33194000  | -1.63956800 |
| N | 3.03740700 | 0.37438000  | -1.79735600 |

## COM2

Basis set superposition error correction = 0.002080984 Hartree

Electronic energy (in solution) = -2181.77545 Hartree

Entropic correction (in solution) = -2181.26587 Hartree

Sum of electronic and thermal Free Energies (in solution) = -2181.27557 Hartree

|   |             |             |             |
|---|-------------|-------------|-------------|
| C | 2.90233100  | -2.40886200 | -0.61073500 |
| C | 3.15863300  | -1.55082600 | 0.58985400  |
| H | 4.08170000  | -1.69891200 | 1.13959400  |
| C | 2.28416000  | -0.58438000 | 0.97273400  |
| H | -3.41040300 | 0.44304700  | 0.66704900  |
| C | -3.63077000 | 0.34077800  | -0.38949000 |
| C | -4.31486900 | 0.09102900  | -3.09327300 |
| C | -3.98103700 | -0.88983600 | -0.93234400 |
| C | -3.59334900 | 1.43587400  | -1.24435300 |
| C | -3.93363900 | 1.32780400  | -2.58720100 |
| C | -4.32810500 | -1.02879100 | -2.27023600 |
| H | -3.89304600 | 2.20370900  | -3.22393700 |
| H | -4.59658900 | -2.00491500 | -2.65699200 |
| C | -2.93606600 | -2.61953000 | 0.51443000  |
| N | -3.36869200 | -3.71612100 | 1.13843500  |
| C | -2.01679600 | 3.07128600  | -0.22442200 |
| N | -2.06676300 | 4.37195200  | 0.06663100  |
| I | -0.99804100 | -1.85873900 | 0.47543700  |
| I | -0.41817300 | 1.77924500  | 0.07698600  |
| C | -2.53278000 | -4.62619600 | 1.92389500  |
| H | -3.17762900 | -5.39995300 | 2.33292200  |
| H | -2.05786200 | -4.07514600 | 2.73434400  |
| H | -1.77944700 | -5.07600500 | 1.27821700  |
| C | -0.97382300 | 5.14991000  | 0.65277400  |
| H | -1.33015800 | 6.16754300  | 0.79001800  |
| H | -0.11983200 | 5.14431600  | -0.02336700 |

|   |             |             |             |
|---|-------------|-------------|-------------|
| H | -0.69912100 | 4.72086600  | 1.61554600  |
| O | 1.14805100  | -0.36431200 | 0.34855400  |
| H | -4.58224800 | -0.00444900 | -4.13801100 |
| H | -6.08334500 | -2.56846000 | -0.26343200 |
| H | -5.03143900 | 3.79777600  | -1.16942400 |
| C | -5.11969100 | -2.83622500 | 0.13684500  |
| C | -4.72177600 | -3.87034900 | 0.91510900  |
| C | -4.02452100 | 3.84818700  | -0.78981800 |
| C | -3.30402500 | 4.87456000  | -0.27901700 |
| N | -3.99905500 | -2.05961400 | -0.09820800 |
| N | -3.21399700 | 2.72786000  | -0.74197800 |
| H | -5.27077700 | -4.69625600 | 1.33571800  |
| H | -3.55376300 | 5.91078900  | -0.12281500 |
| H | 1.83660200  | -2.64790300 | -0.67620900 |
| C | 3.69977300  | -3.70910000 | -0.56965300 |
| H | 3.56598900  | -4.29148600 | -1.48438200 |
| H | 4.76574200  | -3.51472600 | -0.43147500 |
| H | 3.36296200  | -4.31247600 | 0.27673600  |
| C | 2.57630900  | 0.27872200  | 2.16232200  |
| C | 1.52583000  | 0.66573800  | 3.00099800  |
| C | 3.87013800  | 0.72083600  | 2.45750800  |
| C | 1.76358400  | 1.45843700  | 4.11959900  |
| H | 0.51985900  | 0.32642000  | 2.77738000  |
| C | 4.10840300  | 1.51929900  | 3.57290100  |
| H | 4.69117000  | 0.45062100  | 1.80154200  |
| C | 3.05686600  | 1.88948300  | 4.40839500  |
| H | 0.94022000  | 1.73965300  | 4.76692400  |
| H | 5.11556700  | 1.86087300  | 3.78451200  |
| H | 3.24351400  | 2.51249800  | 5.27574500  |
| C | 4.56554200  | -0.98816000 | -2.01221000 |
| C | 4.38453800  | 0.39369000  | -2.00312100 |
| C | 5.41391400  | 1.31511800  | -1.98171400 |
| C | 6.70603500  | 0.79204300  | -1.97508900 |
| C | 6.92259900  | -0.58676100 | -2.00016600 |
| C | 5.85817900  | -1.49127300 | -2.01864400 |
| C | 3.20778300  | -1.63630400 | -1.96578400 |
| C | 2.30604400  | -0.46202900 | -2.07608500 |
| H | 5.22322500  | 2.38129600  | -1.97526300 |
| H | 7.55290000  | 1.46758200  | -1.96019500 |
| H | 7.93852100  | -0.96360300 | -2.00959800 |
| H | 6.04609300  | -2.55735800 | -2.04947900 |
| H | 3.01528200  | -2.33487300 | -2.78607400 |
| H | 1.22960400  | -0.46899400 | -2.16795900 |
| H | 2.57788000  | 1.57104200  | -2.10545500 |



N 2.98525600 0.63879600 -2.05389700

**The indirect hydrogen proton transfer reaction pathway  
Transition State2 TS2(a)**

Imaginary frequency -290.94 cm<sup>-1</sup>

Basis set superposition error correction = 0.002514549 Hartree

Electronic energy (in solution) = -2181.76725 Hartree

Entropic correction (in solution) = -2181.26223 Hartree

Sum of electronic and thermal Free Energies (in solution) = -2181.27199 Hartree

|   |             |             |             |
|---|-------------|-------------|-------------|
| C | 3.13197400  | 2.19795300  | -2.23734800 |
| C | 2.68538200  | 2.96960700  | -1.02009200 |
| H | 3.27147800  | 3.83586700  | -0.73687900 |
| C | 1.63977700  | 2.58952400  | -0.24630900 |
| H | -2.56343700 | -1.33211800 | 1.12302100  |
| C | -2.72673700 | -1.86407100 | 0.19263800  |
| C | -3.23678800 | -3.29942400 | -2.15695700 |
| C | -2.05990400 | -3.05043900 | -0.08493500 |
| C | -3.62996400 | -1.39665300 | -0.75416700 |
| C | -3.89733100 | -2.09910100 | -1.92225400 |
| C | -2.30397300 | -3.77651800 | -1.24401500 |
| H | -4.60936800 | -1.70279400 | -2.63682300 |
| H | -1.76517800 | -4.69917100 | -1.42496000 |
| C | 0.04237100  | -2.98476200 | 1.24646600  |
| N | 0.64913500  | -3.81247900 | 2.09794900  |
| C | -3.76876300 | 1.06265600  | -0.43654200 |
| N | -4.75846100 | 1.93820900  | -0.25391600 |
| I | 0.74032800  | -1.14829600 | 0.62412500  |
| I | -1.73339900 | 1.47180500  | -0.53886700 |
| C | 1.93543400  | -3.56734500 | 2.75396400  |
| H | 1.87503100  | -2.65231100 | 3.34164300  |
| H | 2.71768800  | -3.48375800 | 1.99971500  |
| H | 2.13760000  | -4.41297700 | 3.40622600  |
| C | -4.58939800 | 3.38395200  | -0.09528800 |
| H | -5.57866200 | 3.82520100  | -0.00412400 |
| H | -4.08361800 | 3.78886300  | -0.97042900 |
| H | -4.00973400 | 3.58512500  | 0.80501100  |
| O | 0.91419100  | 1.50200700  | -0.49736900 |
| H | -3.43648500 | -3.85594100 | -3.06386000 |
| H | -2.06577300 | -5.44051500 | 1.30392000  |
| H | -6.34175000 | -0.90975100 | -0.44092700 |
| C | -1.21460500 | -4.80218100 | 1.47315900  |
| C | -0.11579400 | -4.94921100 | 2.25123300  |
| C | -5.69900500 | -0.04605100 | -0.40214500 |
| C | -5.96591900 | 1.27036800  | -0.23138900 |

|   |             |             |             |
|---|-------------|-------------|-------------|
| N | -1.10721800 | -3.56883300 | 0.85707800  |
| N | -4.32559400 | -0.16204500 | -0.52113000 |
| H | 0.19200600  | -5.74948700 | 2.90334100  |
| H | -6.89617900 | 1.79515800  | -0.09095300 |
| H | 2.48595500  | 2.44251900  | -3.09120700 |
| C | 4.57747400  | 2.51685100  | -2.61552000 |
| H | 4.88200000  | 1.95329300  | -3.50115100 |
| H | 4.68544200  | 3.58301000  | -2.83014000 |
| H | 5.25506100  | 2.26567000  | -1.79476300 |
| C | 1.27292600  | 3.35405700  | 0.98719700  |
| C | 0.65465700  | 2.69153900  | 2.05273800  |
| C | 1.51598000  | 4.72799500  | 1.10822600  |
| C | 0.31437200  | 3.37303800  | 3.21802700  |
| H | 0.44313300  | 1.63237300  | 1.96617900  |
| C | 1.17169300  | 5.41104600  | 2.26966600  |
| H | 1.96119000  | 5.27179200  | 0.28277200  |
| C | 0.57238600  | 4.73626300  | 3.33187600  |
| H | -0.15575400 | 2.83873000  | 4.03620700  |
| H | 1.36223200  | 6.47608000  | 2.34160300  |
| H | 0.30194200  | 5.27088100  | 4.23534200  |
| C | 3.74127600  | -0.09626300 | -1.02594900 |
| C | 3.86710700  | -1.39166800 | -1.53937100 |
| C | 4.45384200  | -2.44249400 | -0.84829300 |
| C | 4.95055300  | -2.14859000 | 0.41577600  |
| C | 4.85015400  | -0.85670300 | 0.95107400  |
| C | 4.24129100  | 0.17695700  | 0.24660000  |
| C | 2.93429700  | 0.68894500  | -1.99521700 |
| C | 2.75934400  | -0.22340800 | -3.09640100 |
| H | 4.51617900  | -3.43658100 | -1.27441000 |
| H | 5.42372900  | -2.93155900 | 0.99655400  |
| H | 5.25139100  | -0.66272900 | 1.93912300  |
| H | 4.15158000  | 1.16736600  | 0.67725000  |
| H | 1.85747500  | 0.74787600  | -1.48669900 |
| H | 2.25403800  | -0.04218900 | -4.03652300 |
| H | 3.18157000  | -2.22101200 | -3.40425500 |
| N | 3.25554100  | -1.40116100 | -2.80687000 |

### COM3(a)

Basis set superposition error correction = 0.002092067 Hartree

Electronic energy (in solution) = -2181.80806 Hartree

Entropic correction (in solution) = -2181.30214 Hartree

Sum of electronic and thermal Free Energies (in solution) = -2181.31189 Hartree

|   |            |            |             |
|---|------------|------------|-------------|
| C | 3.75067100 | 2.10400700 | -2.02684500 |
| C | 3.25495000 | 2.74951800 | -0.74855600 |
| H | 3.89412800 | 3.51219400 | -0.31716400 |

|   |             |             |             |
|---|-------------|-------------|-------------|
| C | 2.10991200  | 2.49948300  | -0.10553800 |
| H | -2.74395100 | -1.15429800 | 1.08860400  |
| C | -2.85719200 | -1.65269300 | 0.13241900  |
| C | -3.22905900 | -2.99300200 | -2.29915500 |
| C | -2.22996100 | -2.86398400 | -0.12621600 |
| C | -3.65738100 | -1.11946100 | -0.86939700 |
| C | -3.85504200 | -1.77129000 | -2.07972900 |
| C | -2.40435600 | -3.54344200 | -1.32481500 |
| H | -4.48790100 | -1.32156300 | -2.83591900 |
| H | -1.89645300 | -4.48706000 | -1.48634300 |
| C | -0.22040900 | -2.97121000 | 1.32929900  |
| N | 0.24664000  | -3.81606900 | 2.24854100  |
| C | -3.73259900 | 1.33431800  | -0.49841500 |
| N | -4.69231000 | 2.24377500  | -0.33023400 |
| I | 0.71368800  | -1.26377300 | 0.68367000  |
| I | -1.70903900 | 1.68986400  | -0.54477400 |
| C | 1.50518000  | -3.66685600 | 2.98387700  |
| H | 1.49947500  | -2.72098500 | 3.52379300  |
| H | 2.34063400  | -3.70503600 | 2.28537700  |
| H | 1.57434500  | -4.49197400 | 3.68832100  |
| C | -4.48226500 | 3.67973200  | -0.12877000 |
| H | -5.46030600 | 4.14960900  | -0.06654300 |
| H | -3.92964100 | 4.08748300  | -0.97392900 |
| H | -3.93446600 | 3.83940400  | 0.79935400  |
| O | 1.20464000  | 1.53981100  | -0.51383100 |
| H | -3.37389100 | -3.51152100 | -3.23835500 |
| H | -2.56596100 | -5.19799000 | 1.33138300  |
| H | -6.36333500 | -0.54111800 | -0.66586600 |
| C | -1.66674800 | -4.64047700 | 1.53504300  |
| C | -0.63976700 | -4.86274800 | 2.39047100  |
| C | -5.69311600 | 0.29758800  | -0.57589800 |
| C | -5.92031500 | 1.61827200  | -0.37685100 |
| N | -1.39448700 | -3.45217200 | 0.88342900  |
| N | -4.32219900 | 0.13386600  | -0.64386000 |
| H | -0.45749300 | -5.66159600 | 3.08973200  |
| H | -6.83665500 | 2.17211500  | -0.25856500 |
| H | 3.25639800  | 2.60032800  | -2.87200000 |
| C | 5.26221200  | 2.33859600  | -2.16680500 |
| H | 5.62458500  | 1.93194500  | -3.11292700 |
| H | 5.48808900  | 3.40746200  | -2.13720100 |
| H | 5.80284600  | 1.85082400  | -1.35125600 |
| C | 1.66659400  | 3.20153200  | 1.12147900  |
| C | 0.84686600  | 2.55345100  | 2.05109000  |
| C | 2.04984600  | 4.52526500  | 1.36949000  |

|   |             |             |             |
|---|-------------|-------------|-------------|
| C | 0.43625200  | 3.20422000  | 3.21077400  |
| H | 0.53516400  | 1.53079900  | 1.87808100  |
| C | 1.64100600  | 5.17263500  | 2.52902000  |
| H | 2.65443200  | 5.05703100  | 0.64396400  |
| C | 0.83332200  | 4.51509000  | 3.45519500  |
| H | -0.19326200 | 2.68339300  | 3.92332400  |
| H | 1.94287200  | 6.19909100  | 2.70330500  |
| H | 0.51153800  | 5.02438400  | 4.35626900  |
| C | 3.79019300  | -0.41577000 | -1.20879700 |
| C | 3.39336500  | -1.64162600 | -1.79820700 |
| C | 3.58886700  | -2.87421200 | -1.16668600 |
| C | 4.18516800  | -2.86050600 | 0.08194000  |
| C | 4.57607600  | -1.65208000 | 0.69586800  |
| C | 4.38596500  | -0.43435200 | 0.06587500  |
| C | 3.43750200  | 0.63168000  | -2.13903200 |
| C | 2.84715700  | 0.00738300  | -3.20997200 |
| H | 3.28069000  | -3.79964500 | -1.64009200 |
| H | 4.35552400  | -3.79744800 | 0.60011500  |
| H | 5.03541400  | -1.68258400 | 1.67745600  |
| H | 4.69421700  | 0.49006100  | 0.54250900  |
| H | 1.55862700  | 1.09190100  | -1.30336600 |
| H | 2.44991100  | 0.43828900  | -4.11768000 |
| H | 2.43284700  | -2.02556800 | -3.65485000 |
| N | 2.81817200  | -1.34991600 | -3.00977900 |

**P(a)**

Electronic energy (in solution) = -826.02516 Hartree

Entropic correction (in solution) = -825.75399 Hartree

Sum of electronic and thermal Free Energies (in solution) = -825.76429 Hartree

|   |             |             |             |
|---|-------------|-------------|-------------|
| C | 0.68276700  | 2.12563200  | 0.28735400  |
| C | -0.66517300 | 1.45531000  | 0.47258200  |
| H | -1.14563500 | 1.56225800  | 1.43857600  |
| C | -1.30004100 | 0.73406200  | -0.46132100 |
| O | -0.78162800 | 0.48295600  | -1.69885000 |
| H | 0.57474300  | 2.92825800  | -0.45423200 |
| C | 1.13878800  | 2.76032900  | 1.60745100  |
| H | 2.08319700  | 3.29121600  | 1.47215500  |
| H | 0.38996200  | 3.46861500  | 1.97137600  |
| H | 1.28222000  | 1.99159500  | 2.37186900  |
| C | -2.62487400 | 0.09666100  | -0.26807300 |
| C | -2.96738900 | -1.03624700 | -1.01420900 |
| C | -3.55035100 | 0.60401000  | 0.65193400  |
| C | -4.19710300 | -1.66096100 | -0.82714800 |
| H | -2.26328400 | -1.43056000 | -1.73647800 |
| C | -4.77668700 | -0.02276000 | 0.83780400  |

|   |             |             |             |
|---|-------------|-------------|-------------|
| H | -3.31899600 | 1.50205800  | 1.21302900  |
| C | -5.10486000 | -1.15951700 | 0.10093500  |
| H | -4.44470800 | -2.54193300 | -1.40859900 |
| H | -5.48362800 | 0.38487400  | 1.55155000  |
| H | -6.06377400 | -1.64428800 | 0.24426800  |
| C | 2.10699500  | -0.10464800 | 0.29481400  |
| C | 3.15785700  | -0.60384800 | -0.51347100 |
| C | 3.76235500  | -1.84285800 | -0.27348500 |
| C | 3.29456500  | -2.58195200 | 0.79885100  |
| C | 2.24934400  | -2.10547300 | 1.61778800  |
| C | 1.65326600  | -0.87986100 | 1.37684200  |
| C | 1.73407100  | 1.18073400  | -0.24536300 |
| C | 2.55294000  | 1.39264800  | -1.32561800 |
| H | 4.56501200  | -2.20487900 | -0.90593200 |
| H | 3.73991500  | -3.54654500 | 1.01453100  |
| H | 1.91047200  | -2.71347900 | 2.44880200  |
| H | 0.85012500  | -0.52188900 | 2.01187400  |
| H | 0.15777400  | 0.72138200  | -1.70829900 |
| H | 2.59110600  | 2.23627600  | -1.99995400 |
| H | 4.09752200  | 0.24281700  | -2.22117700 |
| N | 3.40745500  | 0.32900100  | -1.48836500 |

**The direct hydrogen proton transfer reaction pathway**

**Transition State2 TS2(b)**

Imaginary frequency -1477.20 cm<sup>-1</sup>

Basis set superposition error correction = 0.001934023 Hartree

Electronic energy (in solution) = -2181.73002 Hartree

Entropic correction (in solution) = -2181.22970 Hartree

Sum of electronic and thermal Free Energies (in solution) = -2181.23938 Hartree

|   |             |             |             |
|---|-------------|-------------|-------------|
| C | 3.10280400  | -2.12786400 | 0.51415800  |
| C | 3.28793200  | -0.96603600 | 1.49093900  |
| H | 4.17068400  | -0.94515600 | 2.12034900  |
| C | 2.25508600  | -0.05567000 | 1.69330000  |
| H | -3.47667900 | 0.45914100  | 0.20118800  |
| C | -3.43333100 | 0.13277000  | -0.83173400 |
| C | -3.42497900 | -0.69528300 | -3.50664400 |
| C | -3.62515800 | -1.20023200 | -1.17309900 |
| C | -3.20532500 | 1.03537500  | -1.86316900 |
| C | -3.20161800 | 0.64091500  | -3.19530700 |
| C | -3.62686500 | -1.62699800 | -2.49505600 |
| H | -3.02195700 | 1.37421900  | -3.97273100 |
| H | -3.77952800 | -2.67566300 | -2.72231600 |
| C | -2.96141300 | -2.54091600 | 0.81089000  |
| N | -3.53748500 | -3.48759800 | 1.55213800  |
| C | -1.94741500 | 2.93120600  | -0.86258000 |

|   |             |             |             |
|---|-------------|-------------|-------------|
| N | -2.09485800 | 4.25620100  | -0.83521700 |
| I | -1.06439500 | -1.75719400 | 1.04859100  |
| I | -0.42667900 | 1.82961600  | 0.00753800  |
| C | -2.92239100 | -4.16053000 | 2.69805300  |
| H | -2.68291800 | -3.42552900 | 3.46526300  |
| H | -2.02196800 | -4.68060100 | 2.37374800  |
| H | -3.64257100 | -4.87664600 | 3.08526300  |
| C | -1.18655600 | 5.19613700  | -0.17475300 |
| H | -0.20138500 | 5.13500800  | -0.63517200 |
| H | -1.12610900 | 4.95629000  | 0.88609300  |
| H | -1.59334500 | 6.19579800  | -0.30441800 |
| O | 1.13797700  | -0.13916000 | 1.07542400  |
| H | -3.42406700 | -1.01494400 | -4.54090500 |
| H | -5.84090400 | -2.78573600 | -0.65157100 |
| H | -4.68244100 | 3.27244100  | -2.56469700 |
| C | -4.99866700 | -2.91980300 | 0.00662600  |
| C | -4.80408200 | -3.73922600 | 1.06747300  |
| C | -3.79087900 | 3.45815800  | -1.98901800 |
| C | -3.23357800 | 4.60463300  | -1.53153800 |
| N | -3.84406900 | -2.17231000 | -0.13773200 |
| N | -2.98282300 | 2.42159700  | -1.55805400 |
| H | -5.44562400 | -4.47246200 | 1.52724400  |
| H | -3.53995200 | 5.63285700  | -1.62902100 |
| H | 2.07133700  | -2.48987600 | 0.53984900  |
| C | 4.05313800  | -3.28655800 | 0.77480600  |
| H | 4.03322700  | -4.00852000 | -0.04448100 |
| H | 5.07890500  | -2.94044400 | 0.91099800  |
| H | 3.75392400  | -3.79731900 | 1.69324500  |
| C | 2.45217900  | 1.10912300  | 2.61560500  |
| C | 1.33546600  | 1.63588600  | 3.27159200  |
| C | 3.70535900  | 1.69008000  | 2.83369100  |
| C | 1.46844100  | 2.71630200  | 4.13800500  |
| H | 0.36445000  | 1.18106300  | 3.10786600  |
| C | 3.83625800  | 2.77643000  | 3.69288200  |
| H | 4.57733700  | 1.30601400  | 2.31607300  |
| C | 2.71949800  | 3.29154800  | 4.34820000  |
| H | 0.59662000  | 3.10926200  | 4.64895900  |
| H | 4.81067100  | 3.22659200  | 3.84540600  |
| H | 2.82405800  | 4.13775800  | 5.01770500  |
| C | 4.49012400  | -1.33182300 | -1.70660200 |
| C | 4.06725100  | -0.67227300 | -2.87605500 |
| C | 4.92019700  | -0.36529900 | -3.93283100 |
| C | 6.24359000  | -0.75527400 | -3.80445000 |
| C | 6.69288600  | -1.41655600 | -2.64979600 |

|   |            |             |             |
|---|------------|-------------|-------------|
| C | 5.83594400 | -1.70014800 | -1.59565000 |
| C | 3.31972700 | -1.38623100 | -0.81186900 |
| C | 2.25341200 | -0.85404200 | -1.57867700 |
| H | 4.55715300 | 0.15309200  | -4.81236000 |
| H | 6.94238100 | -0.54507500 | -4.60545900 |
| H | 7.73424100 | -1.70833300 | -2.57910900 |
| H | 6.21285700 | -2.19592700 | -0.71130100 |
| H | 3.51522500 | -0.38456500 | 0.03584600  |
| H | 1.21205000 | -0.77575800 | -1.30552800 |
| H | 2.14591600 | 0.07796000  | -3.44043700 |
| N | 2.70769900 | -0.40744300 | -2.74943900 |

### COM3(b)

Basis set superposition error correction = 0.00122609 Hartree

Electronic energy (in solution) = -2181.82586 Hartree

Entropic correction (in solution) = -2181.31770 Hartree

Sum of electronic and thermal Free Energies (in solution) = -2181.32744 Hartree

|   |             |             |             |
|---|-------------|-------------|-------------|
| C | -3.15239000 | -2.30719900 | 0.96482900  |
| C | -2.46389300 | -1.29383300 | 1.92249500  |
| H | -3.11414000 | -1.13051700 | 2.78233400  |
| C | -2.14397900 | -0.00625500 | 1.20801300  |
| C | 3.95618400  | -0.05364000 | -0.20383100 |
| C | 5.21141000  | -0.19776100 | 2.29652700  |
| C | 4.22651800  | -1.27562800 | 0.39794800  |
| C | 4.30551800  | 1.09470500  | 0.49444300  |
| C | 4.92985800  | 1.04153900  | 1.73384900  |
| C | 4.85151600  | -1.36589100 | 1.63467600  |
| H | 5.18583300  | 1.96076600  | 2.24746100  |
| H | 5.04524400  | -2.33940800 | 2.06978900  |
| C | 2.60766100  | -2.91355700 | -0.52476000 |
| N | 2.69072600  | -4.09682300 | -1.13257500 |
| C | 2.82439100  | 2.91551200  | -0.32204600 |
| N | 3.00725800  | 4.12926800  | -0.84153700 |
| I | 0.88882900  | -1.89614800 | -0.02326000 |
| I | 1.01835000  | 2.01485000  | 0.06824400  |
| C | 1.55541700  | -4.91350900 | -1.56856600 |
| H | 1.95535000  | -5.80547400 | -2.04362100 |
| H | 0.95650800  | -4.35162000 | -2.28388100 |
| H | 0.95638400  | -5.19212900 | -0.70262500 |
| C | 1.94577900  | 5.05330000  | -1.24754800 |
| H | 1.33294200  | 4.58541600  | -2.01692100 |
| H | 2.42268200  | 5.94458700  | -1.64678200 |
| H | 1.33984300  | 5.31314900  | -0.38065900 |
| O | -1.08923500 | 0.08152900  | 0.58576900  |
| H | 5.69773500  | -0.25317300 | 3.26201800  |

|   |             |             |             |
|---|-------------|-------------|-------------|
| H | 5.81864400  | -3.30106900 | -0.63788800 |
| H | 6.05580400  | 3.06825400  | -0.35292100 |
| C | 4.75460800  | -3.44014100 | -0.73341800 |
| C | 4.01852400  | -4.44273200 | -1.27090200 |
| C | 5.00726000  | 3.29375800  | -0.45520600 |
| C | 4.35907000  | 4.38446200  | -0.93039400 |
| N | 3.86081000  | -2.48967800 | -0.27756400 |
| N | 4.03669200  | 2.38182300  | -0.08497300 |
| H | 4.31085200  | -5.36585900 | -1.74316800 |
| H | 4.72896200  | 5.31437300  | -1.32889100 |
| H | -2.45365800 | -2.51093000 | 0.14507000  |
| C | -3.41347300 | -3.60853800 | 1.72071700  |
| H | -3.85836100 | -4.35469500 | 1.05890900  |
| H | -2.48153700 | -4.01263000 | 2.12371400  |
| H | -4.09770100 | -3.43954500 | 2.55691900  |
| C | -3.11754600 | 1.12116900  | 1.17397700  |
| C | -2.97986000 | 2.08397900  | 0.16539900  |
| C | -4.19245400 | 1.20825100  | 2.06371200  |
| C | -3.90409700 | 3.11129100  | 0.04342500  |
| H | -2.16770400 | 1.99617100  | -0.54674700 |
| C | -5.11306000 | 2.24517300  | 1.94594400  |
| H | -4.32120200 | 0.47788700  | 2.85172300  |
| C | -4.97446200 | 3.19131900  | 0.93470100  |
| H | -3.80004600 | 3.84160800  | -0.75059400 |
| H | -5.94179100 | 2.30909300  | 2.64130300  |
| H | -5.70075900 | 3.99039600  | 0.83745300  |
| C | -4.46441800 | -0.93959100 | -0.84159300 |
| C | -5.77664600 | -0.41306700 | -0.93185400 |
| C | -6.17409600 | 0.42255400  | -1.98177500 |
| C | -5.22956500 | 0.72277100  | -2.94861200 |
| C | -3.91886700 | 0.20357500  | -2.88170300 |
| C | -3.52902900 | -0.62045300 | -1.84047800 |
| C | -4.39935300 | -1.71308200 | 0.37046500  |
| C | -5.64466000 | -1.64020800 | 0.93847000  |
| H | -7.18173600 | 0.81980300  | -2.03031600 |
| H | -5.50211300 | 1.36921100  | -3.77519000 |
| H | -3.20874100 | 0.46133800  | -3.65934000 |
| H | -2.51509000 | -1.00625900 | -1.78947100 |
| H | -1.52088000 | -1.71854000 | 2.27623600  |
| H | -6.01309000 | -2.06961500 | 1.85865300  |
| H | -7.44447900 | -0.67296200 | 0.35747500  |
| N | -6.47130000 | -0.86183200 | 0.16216000  |
| H | 3.50909100  | -0.00003900 | -1.19032500 |



## 2.1.4 Cat3 ((C<sub>4</sub>H<sub>5</sub>N<sub>2</sub>I<sup>+</sup>)<sub>2</sub>C<sub>6</sub>H<sub>3</sub>CF<sub>3</sub>) catalyzed reaction

### cat3 ((C<sub>4</sub>H<sub>5</sub>N<sub>2</sub>I<sup>+</sup>)<sub>2</sub>C<sub>6</sub>H<sub>3</sub>CF<sub>3</sub>)

Electronic energy (in solution) = -1692.80627 Hartree

Entropic correction (in solution) = -1692.58446 Hartree

Sum of electronic and thermal Free Energies (in solution) = -1692.59449 Hartree

|   |             |             |             |
|---|-------------|-------------|-------------|
| C | -0.01029900 | -0.78792200 | 1.29216200  |
| C | -0.00300600 | 1.98104500  | 1.00385600  |
| C | -1.19424600 | -0.07120900 | 1.22309300  |
| C | 1.18041700  | -0.07793900 | 1.21891000  |
| C | 1.20729700  | 1.30017700  | 1.07676900  |
| C | -1.21438400 | 1.30990100  | 1.08194700  |
| H | 2.15156300  | 1.83233700  | 1.03884800  |
| H | -2.15585600 | 1.84509400  | 1.05232600  |
| C | -3.33959900 | -0.91321900 | 0.31331600  |
| N | -4.34838700 | -1.65098000 | 0.77188700  |
| C | 3.32425000  | -0.93141800 | 0.31368900  |
| N | 4.32463600  | -1.67957500 | 0.77390300  |
| I | -3.17984400 | -0.16812600 | -1.58589900 |
| I | 3.18037600  | -0.17549100 | -1.58246400 |
| C | -5.54270500 | -2.03608400 | 0.01485400  |
| H | -6.18723000 | -2.59631700 | 0.68687300  |
| H | -5.25151100 | -2.66118800 | -0.82834000 |
| H | -6.05614000 | -1.13949300 | -0.32958400 |
| C | 5.52067100  | -2.06906800 | 0.02184300  |
| H | 6.15332300  | -2.64482900 | 0.69194000  |
| H | 6.04718200  | -1.17427600 | -0.30723000 |
| H | 5.22951000  | -2.68055700 | -0.83126300 |
| C | -2.88668200 | -1.47378400 | 2.41049400  |
| C | -4.08473100 | -2.01099000 | 2.07609900  |
| C | 2.85535500  | -1.49948500 | 2.40538200  |
| C | 4.05092000  | -2.04445000 | 2.07481200  |
| N | -2.43443800 | -0.78633900 | 1.29965600  |
| N | 2.41488800  | -0.80239900 | 1.29569200  |
| H | -0.01334400 | -1.86732000 | 1.39206000  |
| H | -4.77924200 | -2.60883800 | 2.64243200  |
| H | -2.31635900 | -1.49834300 | 3.32411400  |
| H | 2.27994000  | -1.52378700 | 3.31584800  |
| H | 4.73754800  | -2.65060900 | 2.64193100  |
| C | 0.02396900  | 3.47366100  | 0.82071200  |
| F | -1.16679600 | 4.03579400  | 1.04819300  |
| F | 0.38411500  | 3.80828000  | -0.42992600 |
| F | 0.90625200  | 4.05810400  | 1.64369700  |

### cat3 -Michael acceptor

Basis set superposition error correction = 0.001301979 Hartree

Electronic energy (in solution) = -2155.04595 Hartree

Entropic correction (in solution) = -2154.66483 Hartree

Sum of electronic and thermal Free Energies (in solution) = -2154.67463 Hartree

|   |             |             |             |
|---|-------------|-------------|-------------|
| C | -2.82831400 | -3.39311700 | 1.81884100  |
| C | -3.68977200 | -2.79891500 | 0.98472000  |
| H | -4.68788000 | -3.19789500 | 0.84210400  |
| C | -3.31899400 | -1.57694100 | 0.25180900  |
| C | 2.58661000  | 0.99208300  | 0.33195000  |
| C | 2.78333400  | 0.55942600  | 3.10109500  |
| C | 3.09124600  | -0.20491900 | 0.85042400  |
| C | 2.10547600  | 1.93015200  | 1.24751600  |
| C | 2.21034300  | 1.72576700  | 2.61727700  |
| C | 3.20154100  | -0.42373000 | 2.21392100  |
| H | 1.82109700  | 2.48158900  | 3.28912900  |
| H | 3.59938800  | -1.36829200 | 2.56533700  |
| C | 2.57649400  | -2.20814200 | -0.48776400 |
| N | 3.26620300  | -3.09248300 | -1.20283300 |
| C | 0.13500300  | 3.12165500  | 0.37748000  |
| N | -0.17138400 | 4.37991400  | 0.07001600  |
| I | 0.54967000  | -2.17608200 | -0.14354700 |
| I | -1.06294800 | 1.45574800  | 0.20621100  |
| C | 2.70153200  | -4.25429600 | -1.89467700 |
| H | 3.51926800  | -4.76975800 | -2.39134100 |
| H | 1.97398900  | -3.91664800 | -2.63154800 |
| H | 2.23286000  | -4.91581900 | -1.16729000 |
| C | -1.46683600 | 4.84355800  | -0.43435000 |
| H | -1.37736200 | 5.90705800  | -0.63984500 |
| H | -2.23187200 | 4.67443400  | 0.32223100  |
| H | -1.70943800 | 4.30891700  | -1.35169600 |
| O | -2.14718700 | -1.21242100 | 0.14507300  |
| H | 2.86908300  | 0.39907900  | 4.16810000  |
| H | 5.57439400  | -1.00780700 | -0.19823200 |
| H | 2.92427500  | 4.60705600  | 1.09306200  |
| C | 4.72101700  | -1.61278300 | -0.45605100 |
| C | 4.60177900  | -2.74186300 | -1.19400200 |
| C | 1.91370100  | 4.39251100  | 0.78755700  |
| C | 0.92013100  | 5.18659100  | 0.32052500  |
| N | 3.44632500  | -1.28313100 | -0.03135900 |
| N | 1.41021100  | 3.10672500  | 0.81127100  |
| H | 5.33817300  | -3.32962000 | -1.71638900 |
| H | 0.88437300  | 6.24806500  | 0.13998500  |
| H | -1.84803900 | -2.94157300 | 1.96067900  |
| C | -3.11545400 | -4.62775800 | 2.59671100  |
| H | -4.11760700 | -5.00860800 | 2.39862800  |

|   |             |             |             |
|---|-------------|-------------|-------------|
| H | -2.38067900 | -5.40048600 | 2.34990000  |
| C | -4.39578200 | -0.76695200 | -0.38137100 |
| C | -4.08179000 | 0.01827600  | -1.49627300 |
| C | -5.69450700 | -0.75362700 | 0.13505000  |
| C | -5.05761000 | 0.80822600  | -2.08849300 |
| H | -3.07963600 | -0.01699800 | -1.90917300 |
| C | -6.66403400 | 0.05525900  | -0.44808000 |
| H | -5.94356100 | -1.35189800 | 1.00381800  |
| C | -6.34779700 | 0.83171800  | -1.55978700 |
| H | -4.81656700 | 1.40267000  | -2.96194200 |
| H | -7.66611700 | 0.07727700  | -0.03648500 |
| H | -7.10838600 | 1.45302900  | -2.01875400 |
| H | -3.00941300 | -4.42854600 | 3.66741500  |
| C | 2.61007800  | 1.21137400  | -1.16824900 |
| F | 2.31738200  | 2.46241200  | -1.52550300 |
| F | 1.74371100  | 0.40965000  | -1.80594500 |
| F | 3.82524400  | 0.94053800  | -1.66231200 |

### COM1

Basis set superposition error correction = 0.004364071 Hartree

Electronic energy (in solution) = -2518.83756 Hartree

Entropic correction (in solution) = -2518.33347 Hartree

Sum of electronic and thermal Free Energies (in solution) = -2518.34327 Hartree

|   |             |             |             |
|---|-------------|-------------|-------------|
| C | -3.08705300 | -2.67250600 | -1.24043900 |
| C | -3.52001100 | -1.41286600 | -1.37306700 |
| H | -4.56725900 | -1.17373900 | -1.22396400 |
| C | -2.60360600 | -0.32528900 | -1.74210700 |
| C | 2.82813200  | 0.28730900  | 1.13972700  |
| C | 1.44976200  | -0.74847900 | 3.35982500  |
| C | 2.78381000  | -1.08706300 | 1.39703400  |
| C | 2.08998700  | 1.11701400  | 1.98654100  |
| C | 1.41745400  | 0.61190400  | 3.09201400  |
| C | 2.11309600  | -1.60688800 | 2.49263700  |
| H | 0.86220200  | 1.29607200  | 3.72288400  |
| H | 2.10885200  | -2.67946200 | 2.64773900  |
| C | 2.78766200  | -2.50703400 | -0.61610400 |
| N | 3.61294100  | -3.39274900 | -1.16692800 |
| C | 1.17865900  | 3.06747200  | 0.77860400  |
| N | 1.30787500  | 4.38998900  | 0.85505300  |
| I | 0.92796800  | -1.92928700 | -1.28086400 |
| I | 0.00823600  | 2.02777600  | -0.55184300 |
| C | 3.34375900  | -4.16195200 | -2.38454800 |
| H | 4.22669500  | -4.75801700 | -2.59878600 |
| H | 3.15084900  | -3.47697500 | -3.20889800 |
| H | 2.48698200  | -4.81368600 | -2.21876800 |

|   |             |             |             |
|---|-------------|-------------|-------------|
| C | 0.62561100  | 5.36808100  | 0.00262000  |
| H | 0.91354600  | 5.20642600  | -1.03534100 |
| H | 0.94029800  | 6.35720200  | 0.32491600  |
| H | -0.45196900 | 5.26338400  | 0.12365400  |
| O | -1.39743200 | -0.49453000 | -1.91924500 |
| H | 0.92630200  | -1.14423300 | 4.22076600  |
| H | 5.28134300  | -2.37492500 | 1.45270500  |
| H | 3.27002600  | 3.31575000  | 3.23738800  |
| C | 4.62763900  | -2.62153600 | 0.63271600  |
| C | 4.76203200  | -3.48013800 | -0.40574700 |
| C | 2.59217800  | 3.53193700  | 2.42838000  |
| C | 2.18240700  | 4.69947000  | 1.87581600  |
| N | 3.39444800  | -2.01220300 | 0.48268600  |
| N | 1.96029300  | 2.52217100  | 1.72873000  |
| H | 5.56539400  | -4.14384200 | -0.67870700 |
| H | 2.42845000  | 5.72185400  | 2.11011800  |
| H | -2.03431200 | -2.88130900 | -1.41792200 |
| C | -3.94707700 | -3.83251900 | -0.88379700 |
| H | -3.52089600 | -4.36599300 | -0.02915500 |
| H | -4.96576900 | -3.52375800 | -0.64433600 |
| H | -3.97339500 | -4.54357100 | -1.71646000 |
| C | -3.16154000 | 1.04882500  | -1.92420300 |
| C | -2.54566100 | 1.90086800  | -2.84782200 |
| C | -4.23377700 | 1.51358200  | -1.15820300 |
| C | -2.99727600 | 3.20532000  | -3.00216800 |
| H | -1.72311900 | 1.52851500  | -3.44940800 |
| C | -4.66432300 | 2.82943200  | -1.29497100 |
| H | -4.71662600 | 0.86136400  | -0.43939800 |
| C | -4.05007800 | 3.67327900  | -2.21747300 |
| H | -2.52838400 | 3.85788700  | -3.72937400 |
| H | -5.48236400 | 3.19432400  | -0.68492200 |
| H | -4.39619300 | 4.69441200  | -2.32973900 |
| C | -3.31355900 | -2.15304300 | 2.13894100  |
| C | -3.74067900 | -0.82490700 | 1.89286300  |
| C | -5.07028900 | -0.42256200 | 2.05919400  |
| C | -5.97871900 | -1.38311400 | 2.47025100  |
| C | -5.57780600 | -2.71310800 | 2.71576800  |
| C | -4.25990100 | -3.10426300 | 2.55661900  |
| C | -1.90276100 | -2.19301700 | 1.86648000  |
| C | -1.54042400 | -0.93009500 | 1.48359900  |
| H | -5.37242800 | 0.60260600  | 1.87564100  |
| H | -7.01791700 | -1.10770200 | 2.60941700  |
| H | -6.31812900 | -3.43684200 | 3.03716300  |
| H | -3.95990800 | -4.12896400 | 2.74864900  |

|   |             |             |             |
|---|-------------|-------------|-------------|
| H | -1.24403700 | -3.04560100 | 1.94287800  |
| H | -0.56965500 | -0.54725900 | 1.20724800  |
| H | -2.63752500 | 0.88305600  | 1.28160000  |
| N | -2.64003800 | -0.10705900 | 1.48724400  |
| C | 3.69566500  | 0.79251500  | 0.00280400  |
| F | 3.82936300  | 2.11948100  | -0.01248900 |
| F | 3.21178000  | 0.43535800  | -1.19616500 |
| F | 4.92897600  | 0.27832800  | 0.09217200  |

### Transition State1 (TS1)

Imaginary frequency -429.60 cm<sup>-1</sup>

Basis set superposition error correction = 0.004681476 Hartree

Electronic energy (in solution) = -2518.80498 Hartree

Entropic correction (in solution) = -2518.29946 Hartree

Sum of electronic and thermal Free Energies (in solution) = -2518.30917 Hartree

|   |             |             |             |
|---|-------------|-------------|-------------|
| C | 3.29594100  | -2.16578400 | -0.82290100 |
| C | 3.47677800  | -1.45503600 | 0.40312900  |
| H | 4.39565400  | -1.59191800 | 0.96128300  |
| C | 2.52814800  | -0.53888900 | 0.83631000  |
| C | -3.55011700 | 0.22469500  | -0.67461400 |
| C | -3.24061000 | -0.29090800 | -3.41826700 |
| C | -3.58080600 | -1.07960000 | -1.17975100 |
| C | -3.26563000 | 1.25292400  | -1.57642600 |
| C | -3.12379000 | 1.00381100  | -2.93537500 |
| C | -3.44050000 | -1.34205300 | -2.53300900 |
| H | -2.90186400 | 1.83243100  | -3.59742000 |
| H | -3.47199100 | -2.36929900 | -2.87596100 |
| C | -2.62766600 | -2.77943300 | 0.32814800  |
| N | -3.08598200 | -3.83477500 | 0.99676300  |
| C | -1.86245400 | 2.99289600  | -0.55298800 |
| N | -1.98025900 | 4.29319400  | -0.29276500 |
| I | -0.69750600 | -2.03834100 | 0.26254500  |
| I | -0.26512900 | 1.73851100  | -0.13552700 |
| C | -2.27290200 | -4.73095800 | 1.82293100  |
| H | -1.51607300 | -5.20892500 | 1.20262700  |
| H | -2.93409500 | -5.48360400 | 2.24475300  |
| H | -1.80558300 | -4.15820900 | 2.62286300  |
| C | -0.95529600 | 5.12494100  | 0.34133000  |
| H | -1.34281100 | 6.13865300  | 0.39790100  |
| H | -0.04914800 | 5.10717800  | -0.26240900 |
| H | -0.75378400 | 4.74838600  | 1.34337700  |
| O | 1.42665400  | -0.33944300 | 0.20904400  |
| H | -3.13487200 | -0.48685000 | -4.47755700 |
| H | -5.78458600 | -2.64857700 | -0.41432300 |
| H | -4.85334200 | 3.56890600  | -1.67006200 |

|   |             |             |             |
|---|-------------|-------------|-------------|
| C | -4.82562800 | -2.93251900 | -0.01399800 |
| C | -4.44813100 | -3.94940800 | 0.79613700  |
| C | -3.87159300 | 3.67037900  | -1.23822300 |
| C | -3.21961800 | 4.73465500  | -0.71096900 |
| N | -3.68251400 | -2.20208900 | -0.28726200 |
| N | -3.01514500 | 2.59179300  | -1.12639400 |
| H | -5.01702300 | -4.74302800 | 1.25115500  |
| H | -3.51768500 | 5.76341400  | -0.59473000 |
| H | 2.26391100  | -2.25077000 | -1.15353300 |
| C | 4.10113500  | -3.42937600 | -1.01246900 |
| H | 4.04947800  | -3.80711900 | -2.03430400 |
| H | 5.14629500  | -3.27865800 | -0.73576600 |
| H | 3.68837300  | -4.19438100 | -0.34755300 |
| C | 2.76424400  | 0.25347500  | 2.08589600  |
| C | 1.66803800  | 0.62281200  | 2.87182000  |
| C | 4.04647100  | 0.65079000  | 2.47872900  |
| C | 1.84941100  | 1.36321400  | 4.03529000  |
| H | 0.67301700  | 0.30947700  | 2.57401800  |
| C | 4.22646700  | 1.40189900  | 3.63630600  |
| H | 4.90390900  | 0.38878200  | 1.86804900  |
| C | 3.12963900  | 1.75808400  | 4.41811800  |
| H | 0.99302000  | 1.63204200  | 4.64344300  |
| H | 5.22366700  | 1.71394700  | 3.92556400  |
| H | 3.27212700  | 2.34098000  | 5.32098300  |
| C | 5.23022800  | -0.66437500 | -1.95179700 |
| C | 5.09254000  | 0.58706800  | -1.33476200 |
| C | 6.14747600  | 1.26487300  | -0.73689600 |
| C | 7.38948700  | 0.64293900  | -0.77917800 |
| C | 7.55686900  | -0.60453800 | -1.39837700 |
| C | 6.48464800  | -1.27144400 | -1.98223100 |
| C | 3.88176500  | -1.09444100 | -2.33371100 |
| C | 3.06490900  | 0.05078300  | -2.12923500 |
| H | 6.00443500  | 2.22831100  | -0.26195300 |
| H | 8.24511900  | 1.13359100  | -0.33032200 |
| H | 8.54235800  | -1.05483400 | -1.42221400 |
| H | 6.62320100  | -2.23642100 | -2.45616200 |
| H | 3.67086700  | -1.80268700 | -3.12306400 |
| H | 2.01852300  | 0.18643900  | -2.35890900 |
| H | 3.36592300  | 1.84186200  | -1.11757800 |
| N | 3.74996000  | 0.96874600  | -1.46554600 |
| C | -3.85469200 | 0.45417500  | 0.79313900  |
| F | -4.03864000 | 1.73984000  | 1.09763700  |
| F | -2.88070900 | -0.00238300 | 1.59357100  |
| F | -4.97638700 | -0.19129700 | 1.14293800  |

## COM2

Basis set superposition error correction = 0.002311476 Hartree

Electronic energy (in solution) = -2518.81248 Hartree

Entropic correction (in solution) = -2518.30230 Hartree

Sum of electronic and thermal Free Energies (in solution) = -2518.31200 Hartree

|   |             |             |             |
|---|-------------|-------------|-------------|
| C | 3.37715700  | -2.36854700 | -0.55080200 |
| C | 3.44292100  | -1.53904000 | 0.69471200  |
| H | 4.29581900  | -1.66459100 | 1.35274000  |
| C | 2.48001100  | -0.62987500 | 0.99381600  |
| C | -3.44482000 | 0.31634200  | -0.71634300 |
| C | -3.10955000 | -0.12306700 | -3.47027800 |
| C | -3.50889600 | -0.97027400 | -1.26238800 |
| C | -3.11453900 | 1.36283300  | -1.58080800 |
| C | -2.95938700 | 1.15135800  | -2.94474200 |
| C | -3.35603200 | -1.19411000 | -2.62127500 |
| H | -2.70168400 | 1.99320100  | -3.57640100 |
| H | -3.41375500 | -2.20895200 | -2.99659400 |
| C | -2.62046000 | -2.75852200 | 0.17951400  |
| N | -3.11744900 | -3.83404500 | 0.78637200  |
| C | -1.66660500 | 3.02729400  | -0.49819200 |
| N | -1.74813000 | 4.32273800  | -0.20096600 |
| I | -0.66918000 | -2.02936300 | 0.19155800  |
| I | -0.12079800 | 1.69255200  | -0.09064500 |
| C | -2.34295300 | -4.79683600 | 1.57279400  |
| H | -1.51439100 | -5.16998600 | 0.97285000  |
| H | -3.00567900 | -5.61738500 | 1.83585400  |
| H | -1.97231500 | -4.31407600 | 2.47609100  |
| C | -0.70032500 | 5.10375100  | 0.45930000  |
| H | -1.05990700 | 6.12504500  | 0.55323100  |
| H | 0.20410800  | 5.08372700  | -0.14692800 |
| H | -0.50626600 | 4.68614500  | 1.44644500  |
| O | 1.41984000  | -0.44191800 | 0.23664700  |
| H | -2.99394000 | -0.28919800 | -4.53362800 |
| H | -5.77052400 | -2.49481300 | -0.57158100 |
| H | -4.63455800 | 3.72772300  | -1.61147500 |
| C | -4.82326100 | -2.82631600 | -0.18038300 |
| C | -4.48174900 | -3.89545600 | 0.57609600  |
| C | -3.65270100 | 3.78577500  | -1.17208100 |
| C | -2.97194800 | 4.81395700  | -0.61093800 |
| N | -3.65588200 | -2.11875400 | -0.40972200 |
| N | -2.82864900 | 2.67940700  | -1.08809100 |
| H | -5.07655900 | -4.69524600 | 0.98492400  |
| H | -3.23923200 | 5.84751800  | -0.46580800 |
| H | 2.34058800  | -2.66137200 | -0.74568800 |

|   |             |             |             |
|---|-------------|-------------|-------------|
| C | 4.23609900  | -3.62544300 | -0.44994500 |
| H | 4.23656000  | -4.18712300 | -1.38710900 |
| H | 5.26819500  | -3.38019200 | -0.18948600 |
| H | 3.84207800  | -4.27043400 | 0.33899400  |
| C | 2.57288000  | 0.19824500  | 2.23860800  |
| C | 1.40816500  | 0.48423200  | 2.95898800  |
| C | 3.79172000  | 0.70478100  | 2.70138600  |
| C | 1.46107700  | 1.24337900  | 4.12368900  |
| H | 0.45873500  | 0.09369000  | 2.60679400  |
| C | 3.84497100  | 1.46993700  | 3.86336200  |
| H | 4.69956700  | 0.51100100  | 2.13943000  |
| C | 2.68073900  | 1.74086400  | 4.57880100  |
| H | 0.55105300  | 1.44698900  | 4.67726400  |
| H | 4.79593800  | 1.86252900  | 4.20586600  |
| H | 2.72284500  | 2.33817900  | 5.48252300  |
| C | 5.10313400  | -0.80807500 | -1.70811200 |
| C | 4.83666800  | 0.55973700  | -1.69610700 |
| C | 5.79638100  | 1.54000700  | -1.53041800 |
| C | 7.10805600  | 1.09501100  | -1.37452200 |
| C | 7.41173700  | -0.26725000 | -1.39925600 |
| C | 6.41594800  | -1.23281600 | -1.56553000 |
| C | 3.79222900  | -1.53722900 | -1.83926200 |
| C | 2.83840100  | -0.41559600 | -2.03344800 |
| H | 5.54057300  | 2.59243600  | -1.52732600 |
| H | 7.90278200  | 1.81939300  | -1.24282400 |
| H | 8.44289400  | -0.58240000 | -1.29106100 |
| H | 6.67192500  | -2.28469700 | -1.59328300 |
| H | 3.74324100  | -2.21938400 | -2.69401600 |
| H | 1.78271400  | -0.48387600 | -2.25298400 |
| H | 2.98672900  | 1.63055400  | -1.99502400 |
| N | 3.44117200  | 0.72261800  | -1.91312900 |
| C | -3.77325900 | 0.50824000  | 0.75145300  |
| F | -3.88656400 | 1.78992700  | 1.10414800  |
| F | -2.85446300 | -0.03842000 | 1.55939600  |
| F | -4.94294200 | -0.07990000 | 1.04304400  |

**The indirect hydrogen proton transfer reaction pathway**

**Transition State2 TS2(a)**

Imaginary frequency -261.33 cm<sup>-1</sup>

Basis set superposition error correction = 0.002762404 Hartree

Electronic energy (in solution) = -2518.80422 Hartree

Entropic correction (in solution) = -2518.29760Hartree

Sum of electronic and thermal Free Energies (in solution) = -2518.30735 Hartree

|   |             |             |             |
|---|-------------|-------------|-------------|
| C | -3.71952900 | -2.30083700 | -1.79288400 |
| C | -3.22623400 | -2.88615600 | -0.49207500 |



|   |             |             |             |
|---|-------------|-------------|-------------|
| H | -3.85808700 | -3.61970900 | -0.00566200 |
| C | -2.08338000 | -2.47954600 | 0.11242900  |
| C | 2.81690700  | 1.51498400  | -0.26368800 |
| C | 2.50112200  | 2.42434400  | -2.90370100 |
| C | 2.04348100  | 2.64213500  | -0.56085600 |
| C | 3.35257700  | 0.80666500  | -1.34211300 |
| C | 3.21086300  | 1.26104600  | -2.64699400 |
| C | 1.88921700  | 3.10339900  | -1.85849700 |
| H | 3.64524000  | 0.67976900  | -3.45169800 |
| H | 1.28233400  | 3.98349200  | -2.03596200 |
| C | 0.10871200  | 2.98936000  | 0.93233100  |
| N | -0.26835000 | 3.91278400  | 1.81343900  |
| C | 3.34198700  | -1.61450100 | -0.92041900 |
| N | 4.26113200  | -2.57443600 | -0.82558600 |
| I | -0.93092700 | 1.29930000  | 0.38565100  |
| I | 1.27283800  | -1.76537600 | -0.69723300 |
| C | -1.52621700 | 3.90817000  | 2.56478200  |
| H | -1.54320700 | 4.80304700  | 3.18166700  |
| H | -1.56650500 | 3.02154500  | 3.19642900  |
| H | -2.36393200 | 3.91996400  | 1.86837600  |
| C | 3.98377800  | -3.98666800 | -0.55502600 |
| H | 3.59090100  | -4.09211800 | 0.45550700  |
| H | 4.91945300  | -4.53199700 | -0.64827800 |
| H | 3.26586500  | -4.36012500 | -1.28339200 |
| O | -1.30119800 | -1.53044000 | -0.39634300 |
| H | 2.39302000  | 2.78088800  | -3.91997800 |
| H | 2.66750100  | 4.97942500  | 0.85386700  |
| H | 6.06524800  | 0.08826300  | -1.40145000 |
| C | 1.72011700  | 4.51866500  | 1.07979700  |
| C | 0.71804200  | 4.87310000  | 1.91833000  |
| C | 5.35721600  | -0.70311800 | -1.22040400 |
| C | 5.51778900  | -2.03111200 | -1.00878300 |
| N | 1.33270600  | 3.33347900  | 0.47994700  |
| N | 3.99823900  | -0.45957300 | -1.15537000 |
| H | 0.61276600  | 5.71490000  | 2.58231700  |
| H | 6.40456300  | -2.64185600 | -0.97393300 |
| H | -3.17014400 | -2.74464300 | -2.63383700 |
| C | -5.21201200 | -2.55250800 | -2.00090200 |
| H | -5.55078500 | -2.12649200 | -2.94885500 |
| H | -5.41593100 | -3.62612600 | -2.01157200 |
| H | -5.79500700 | -2.10436700 | -1.19148300 |
| C | -1.66264400 | -3.03531200 | 1.43781100  |
| C | -0.85289100 | -2.26691000 | 2.28116700  |
| C | -2.04179100 | -4.31453800 | 1.86457700  |

|   |             |             |             |
|---|-------------|-------------|-------------|
| C | -0.45658900 | -2.74706000 | 3.52638900  |
| H | -0.53365400 | -1.28370500 | 1.95687200  |
| C | -1.64278300 | -4.79702300 | 3.10616500  |
| H | -2.63824600 | -4.94639000 | 1.21637200  |
| C | -0.85148200 | -4.01417000 | 3.94550700  |
| H | 0.16394200  | -2.13049900 | 4.16743100  |
| H | -1.94200400 | -5.79229100 | 3.41554100  |
| H | -0.53904200 | -4.39324300 | 4.91186900  |
| C | -4.04142900 | 0.20850300  | -0.95821800 |
| C | -4.12094100 | 1.40624800  | -1.67742600 |
| C | -4.56415400 | 2.60394400  | -1.13508500 |
| C | -4.96387600 | 2.56857300  | 0.19540100  |
| C | -4.91183300 | 1.37949100  | 0.93586900  |
| C | -4.44471000 | 0.19427900  | 0.37647300  |
| C | -3.39049500 | -0.79580600 | -1.83935100 |
| C | -3.25917400 | -0.09929000 | -3.09448300 |
| H | -4.59338500 | 3.51467000  | -1.72103700 |
| H | -5.32404100 | 3.47530700  | 0.66685900  |
| H | -5.23671800 | 1.38730900  | 1.96983200  |
| H | -4.39049400 | -0.71521100 | 0.96309900  |
| H | -2.27748000 | -0.86015500 | -1.42576400 |
| H | -2.86198600 | -0.47848700 | -4.02721700 |
| H | -3.56166800 | 1.84821800  | -3.70916800 |
| N | -3.63685000 | 1.14941100  | -2.97398200 |
| C | 3.05999900  | 1.14629500  | 1.18749000  |
| F | 4.01125900  | 0.22469300  | 1.34405900  |
| F | 1.95655800  | 0.67543600  | 1.78646400  |
| F | 3.44704900  | 2.22394700  | 1.88470200  |

### COM3(a)

Basis set superposition error correction = 0.001329101 Hartree

Electronic energy (in solution) = -2518.84619 Hartree

Entropic correction (in solution) = -2518.33777 Hartree

Sum of electronic and thermal Free Energies (in solution) = -2518.34753 Hartree

|   |             |             |             |
|---|-------------|-------------|-------------|
| C | -3.82522900 | -2.87581500 | -1.18290900 |
| C | -3.21302800 | -2.97716100 | 0.19960500  |
| H | -3.82996100 | -3.37194500 | 0.99921200  |
| C | -1.96400800 | -2.61373200 | 0.50628000  |
| C | 2.61864800  | 1.65123600  | -0.19329300 |
| C | 2.33310900  | 2.70977800  | -2.78237500 |
| C | 1.75257100  | 2.71683500  | -0.45850400 |
| C | 3.30289900  | 1.10188200  | -1.27929500 |
| C | 3.16935900  | 1.62686500  | -2.55861600 |
| C | 1.60684200  | 3.24917600  | -1.72904300 |
| H | 3.71807700  | 1.16455900  | -3.37047400 |

|   |             |             |             |
|---|-------------|-------------|-------------|
| H | 0.92188600  | 4.07558600  | -1.87815900 |
| C | -0.29516800 | 2.89480800  | 0.90845600  |
| N | -0.74339600 | 3.70006500  | 1.86800700  |
| C | 3.69750100  | -1.31671600 | -0.99468000 |
| N | 4.76112800  | -2.11433900 | -0.94031900 |
| I | -1.33783400 | 1.34928700  | 0.05918100  |
| I | 1.72378700  | -1.84905200 | -0.78072300 |
| C | -2.06514800 | 3.62226100  | 2.49742400  |
| H | -2.14195000 | 4.44550500  | 3.20286200  |
| H | -2.16127400 | 2.67216000  | 3.02146800  |
| H | -2.83451300 | 3.71704300  | 1.73166500  |
| C | 4.72910600  | -3.56989400 | -0.77509600 |
| H | 4.27370700  | -3.81496400 | 0.18360200  |
| H | 5.75621600  | -3.92402700 | -0.79976800 |
| H | 4.16428700  | -4.01439500 | -1.59320700 |
| O | -1.11102100 | -2.05227100 | -0.41942200 |
| H | 2.23025700  | 3.11849800  | -3.77928900 |
| H | 2.26062100  | 4.84816000  | 1.28805400  |
| H | 6.08369300  | 0.85098300  | -1.30848200 |
| C | 1.29853300  | 4.37191400  | 1.37765100  |
| C | 0.23400100  | 4.62607800  | 2.17452100  |
| C | 5.52068300  | -0.05975100 | -1.18914800 |
| C | 5.90537000  | -1.35264500 | -1.06064400 |
| N | 0.95768600  | 3.28004000  | 0.59769200  |
| N | 4.14003800  | -0.05406500 | -1.13998200 |
| H | 0.07694500  | 5.37652700  | 2.93124000  |
| H | 6.88306900  | -1.80468100 | -1.04642300 |
| H | -3.26098100 | -3.53143900 | -1.85924800 |
| C | -5.27851400 | -3.36544800 | -1.15235900 |
| H | -5.70903700 | -3.34786300 | -2.15533100 |
| H | -5.32982400 | -4.38736900 | -0.76835100 |
| H | -5.88416400 | -2.72499400 | -0.50548200 |
| C | -1.34800400 | -2.74122100 | 1.84578000  |
| C | -0.37277400 | -1.82964600 | 2.26275600  |
| C | -1.72852900 | -3.76881500 | 2.71657200  |
| C | 0.19995200  | -1.93146500 | 3.52663900  |
| H | -0.07159000 | -1.02771500 | 1.60142200  |
| C | -1.15889200 | -3.86647300 | 3.98061900  |
| H | -2.45892300 | -4.50325100 | 2.39689700  |
| C | -0.19286500 | -2.94921100 | 4.39083900  |
| H | 0.95102600  | -1.21284700 | 3.83494200  |
| H | -1.46026900 | -4.67012000 | 4.64273100  |
| H | 0.25380600  | -3.03265200 | 5.37488600  |
| C | -4.22127400 | -0.25785400 | -1.15851900 |

|   |             |             |             |
|---|-------------|-------------|-------------|
| C | -4.04189900 | 0.77129000  | -2.11745600 |
| C | -4.41928900 | 2.09644500  | -1.87224700 |
| C | -4.97634900 | 2.38042000  | -0.63854300 |
| C | -5.15937000 | 1.37434000  | 0.33464900  |
| C | -4.79116100 | 0.06404700  | 0.08795700  |
| C | -3.74451500 | -1.48121800 | -1.75996200 |
| C | -3.29590000 | -1.14093500 | -3.01176000 |
| H | -4.27387900 | 2.86626800  | -2.62156800 |
| H | -5.27833600 | 3.39695900  | -0.41273700 |
| H | -5.59830700 | 1.63768300  | 1.29029300  |
| H | -4.93748700 | -0.70371300 | 0.84007200  |
| H | -1.60564500 | -1.83789300 | -1.22834000 |
| H | -2.87105600 | -1.77059500 | -3.78048600 |
| H | -3.21442800 | 0.69646000  | -4.07283400 |
| N | -3.46800500 | 0.20462200  | -3.22725700 |
| C | 2.77389400  | 1.19189100  | 1.24231400  |
| F | 3.65932900  | 0.20873500  | 1.40198600  |
| F | 1.60720000  | 0.75178600  | 1.74401300  |
| F | 3.17183000  | 2.20591400  | 2.02125100  |

**P(a)**

Electronic energy (in solution) = -826.02516 Hartree

Entropic correction (in solution) = -825.75400 Hartree

Sum of electronic and thermal Free Energies (in solution) = -825.76429 Hartree

|   |             |             |             |
|---|-------------|-------------|-------------|
| C | 0.68283700  | 2.12562900  | 0.28720900  |
| C | -0.66510500 | 1.45533700  | 0.47256100  |
| H | -1.14541600 | 1.56229300  | 1.43862300  |
| C | -1.30003300 | 0.73401400  | -0.46123800 |
| O | -0.78167200 | 0.48300800  | -1.69879500 |
| H | 0.57481000  | 2.92812700  | -0.45450600 |
| C | 1.13885800  | 2.76052500  | 1.60720800  |
| H | 2.08328000  | 3.29137300  | 1.47184200  |
| H | 0.39004700  | 3.46887500  | 1.97103400  |
| H | 1.28227100  | 1.99189500  | 2.37173700  |
| C | -2.62493000 | 0.09663600  | -0.26798800 |
| C | -2.96809200 | -1.03536800 | -1.01515600 |
| C | -3.54985800 | 0.60317100  | 0.65309000  |
| C | -4.19788400 | -1.66001300 | -0.82811300 |
| H | -2.26446100 | -1.42905200 | -1.73821000 |
| C | -4.77621100 | -0.02348000 | 0.83889300  |
| H | -3.31800600 | 1.50054500  | 1.21505300  |
| C | -5.10503200 | -1.15939600 | 0.10093700  |
| H | -4.44594400 | -2.54033300 | -1.41036500 |
| H | -5.48271900 | 0.38350400  | 1.55343400  |
| H | -6.06397600 | -1.64411200 | 0.24425300  |

|   |            |             |             |
|---|------------|-------------|-------------|
| C | 2.10710400 | -0.10468400 | 0.29484500  |
| C | 3.15783200 | -0.60399200 | -0.51355800 |
| C | 3.76229900 | -1.84301300 | -0.27357200 |
| C | 3.29463200 | -2.58201100 | 0.79888300  |
| C | 2.24958900 | -2.10540200 | 1.61797500  |
| C | 1.65357200 | -0.87975600 | 1.37706100  |
| C | 1.73411400 | 1.18063100  | -0.24541400 |
| C | 2.55283100 | 1.39243100  | -1.32581500 |
| H | 4.56488900 | -2.20509900 | -0.90606800 |
| H | 3.73994000 | -3.54663000 | 1.01452700  |
| H | 1.91084700 | -2.71331800 | 2.44910700  |
| H | 0.85060400 | -0.52165200 | 2.01223800  |
| H | 0.15769800 | 0.72153700  | -1.70834000 |
| H | 2.59082800 | 2.23594500  | -2.00030000 |
| H | 4.09707200 | 0.24232400  | -2.22165100 |
| N | 3.40749800 | 0.32887900  | -1.48841400 |

**The direct hydrogen proton transfer reaction pathway**

**Transition State2 TS2(b)**

Imaginary frequency -1471.97 cm<sup>-1</sup>

Basis set superposition error correction = 0.002593445 Hartree

Electronic energy (in solution) = -2518.76755 Hartree

Entropic correction (in solution) = -2518.26434 Hartree

Sum of electronic and thermal Free Energies (in solution) = -2518.27407 Hartree

|   |             |             |             |
|---|-------------|-------------|-------------|
| C | -3.03788300 | -2.39220500 | -0.72530300 |
| C | -3.44704900 | -1.18744500 | -1.57390300 |
| H | -4.44211900 | -1.16903800 | -2.00405300 |
| C | -2.50721100 | -0.22066500 | -1.91603900 |
| C | 2.86779100  | 0.25371500  | 1.25732400  |
| C | 1.45817800  | -1.10451300 | 3.27265700  |
| C | 2.87524100  | -1.14277800 | 1.33860200  |
| C | 2.06740200  | 0.94385500  | 2.17031900  |
| C | 1.37822000  | 0.27734700  | 3.17577700  |
| C | 2.18953300  | -1.82118900 | 2.33354100  |
| H | 0.76848700  | 0.85516000  | 3.86099800  |
| H | 2.22415700  | -2.90431900 | 2.35152400  |
| C | 2.94246100  | -2.32135300 | -0.82158900 |
| N | 3.80865600  | -3.09455100 | -1.46991300 |
| C | 0.96937400  | 2.89141500  | 1.15921000  |
| N | 1.00642600  | 4.21198200  | 1.32020200  |
| I | 1.04578100  | -1.74811100 | -1.39735500 |
| I | -0.16273200 | 1.76225600  | -0.16126900 |
| C | 3.57533500  | -3.71943700 | -2.77407300 |
| H | 4.45513400  | -4.30870500 | -3.01884200 |
| H | 3.42701600  | -2.94350500 | -3.52401800 |

|   |             |             |             |
|---|-------------|-------------|-------------|
| H | 2.70026100  | -4.36503700 | -2.71386300 |
| C | 0.21774200  | 5.18047100  | 0.55512400  |
| H | 0.49369700  | 5.12027600  | -0.49674100 |
| H | 0.44548200  | 6.17014300  | 0.94250700  |
| H | -0.84220800 | 4.96687800  | 0.68480000  |
| O | -1.28457700 | -0.28872300 | -1.54408400 |
| H | 0.92325700  | -1.62564100 | 4.05660300  |
| H | 5.44236700  | -2.29740000 | 1.24643300  |
| H | 3.15918400  | 3.15115100  | 3.53936600  |
| C | 4.79632400  | -2.48162800 | 0.40424900  |
| C | 4.96678800  | -3.20795000 | -0.72579400 |
| C | 2.42733000  | 3.36242000  | 2.77769300  |
| C | 1.90486500  | 4.52609900  | 2.32070300  |
| N | 3.53248200  | -1.92395900 | 0.32631500  |
| N | 1.83829900  | 2.35399600  | 2.03939000  |
| H | 5.80110300  | -3.79389800 | -1.07417200 |
| H | 2.08412700  | 5.54790900  | 2.61143300  |
| H | -2.01030700 | -2.68714300 | -0.95352900 |
| C | -3.95918300 | -3.59056400 | -0.89567700 |
| H | -3.76260500 | -4.35383600 | -0.13968400 |
| H | -5.00879200 | -3.29942000 | -0.83421200 |
| H | -3.79786900 | -4.03101200 | -1.88251800 |
| C | -2.92296900 | 0.99978100  | -2.68351200 |
| C | -1.95283400 | 1.67999500  | -3.42640000 |
| C | -4.23215300 | 1.49206100  | -2.66589300 |
| C | -2.28618100 | 2.82054300  | -4.15038500 |
| H | -0.93708300 | 1.30022100  | -3.43918400 |
| C | -4.56295400 | 2.63689100  | -3.38326400 |
| H | -4.99140300 | 0.99359900  | -2.07405800 |
| C | -3.59237700 | 3.30307300  | -4.12929400 |
| H | -1.52644400 | 3.33284900  | -4.72993500 |
| H | -5.57875100 | 3.01447500  | -3.35358400 |
| H | -3.85294700 | 4.19509100  | -4.68760600 |
| C | -4.07674000 | -1.77487600 | 1.72735700  |
| C | -3.49214100 | -1.18474300 | 2.86350100  |
| C | -4.18193900 | -0.96402400 | 4.05232800  |
| C | -5.50553500 | -1.37184600 | 4.09382700  |
| C | -6.11349600 | -1.96673100 | 2.97636500  |
| C | -5.41959000 | -2.16408500 | 1.79069100  |
| C | -3.05215100 | -1.74547100 | 0.66683000  |
| C | -1.88932800 | -1.24487000 | 1.30413400  |
| H | -3.69809600 | -0.49630500 | 4.90157000  |
| H | -6.08033800 | -1.22799000 | 5.00100900  |
| H | -7.15029700 | -2.27558800 | 3.04081600  |

|   |             |             |             |
|---|-------------|-------------|-------------|
| H | -5.91799600 | -2.61169700 | 0.94144500  |
| H | -3.40150300 | -0.69922800 | -0.06046700 |
| H | -0.89762800 | -1.12783700 | 0.89318700  |
| H | -1.51500500 | -0.43427800 | 3.18819000  |
| N | -2.16850500 | -0.88478400 | 2.55621000  |
| C | 3.71582100  | 0.93125300  | 0.19845200  |
| F | 3.79865700  | 2.25336500  | 0.35047600  |
| F | 3.24524400  | 0.70744500  | -1.03743700 |
| F | 4.96904200  | 0.45809300  | 0.22868800  |

### COM3(b)

Basis set superposition error correction = 0.001329101 Hartree

Electronic energy (in solution) = -2518.86213 Hartree

Entropic correction (in solution) = -2518.35527 Hartree

Sum of electronic and thermal Free Energies (in solution) = -2518.36500 Hartree

|   |             |             |             |
|---|-------------|-------------|-------------|
| C | 3.51040500  | -2.30148000 | -0.95513700 |
| C | 2.88539100  | -1.27959600 | -1.94687100 |
| H | 3.59820200  | -1.09793400 | -2.75154600 |
| C | 2.50150500  | -0.00395600 | -1.24350900 |
| C | -3.81777100 | -0.06721100 | -0.10725900 |
| C | -4.15533400 | -0.19251300 | -2.89493100 |
| C | -3.82276000 | -1.28915000 | -0.78612900 |
| C | -3.89000400 | 1.09184100  | -0.88500300 |
| C | -4.06814800 | 1.03800300  | -2.25969000 |
| C | -4.00317500 | -1.35950500 | -2.15957700 |
| H | -4.12145900 | 1.96486200  | -2.81837400 |
| H | -4.00237900 | -2.33148300 | -2.63856000 |
| C | -2.31528300 | -2.95951300 | 0.20953000  |
| N | -2.44508600 | -4.14566100 | 0.79897100  |
| C | -2.52064200 | 2.94441600  | -0.00656900 |
| N | -2.74901100 | 4.16451200  | 0.47360800  |
| I | -0.57566000 | -1.93732300 | -0.20856000 |
| I | -0.69607600 | 2.03812400  | -0.28946400 |
| C | -1.34329700 | -4.98097500 | 1.28423300  |
| H | -1.77854000 | -5.86700300 | 1.73875300  |
| H | -0.77082200 | -4.42807900 | 2.02746200  |
| H | -0.70990400 | -5.26655000 | 0.44545000  |
| C | -1.72196700 | 5.11186000  | 0.91453900  |
| H | -1.15166400 | 4.67157200  | 1.73116000  |
| H | -2.22985300 | 6.00867100  | 1.25946200  |
| H | -1.06964200 | 5.35292200  | 0.07645700  |
| O | 1.40322400  | 0.06786100  | -0.69899900 |
| H | -4.30116900 | -0.24111700 | -3.96630100 |
| H | -5.53806600 | -3.30435900 | 0.15969700  |
| H | -5.75623300 | 3.05032000  | -0.15466100 |

|   |             |             |             |
|---|-------------|-------------|-------------|
| C | -4.48173800 | -3.45949500 | 0.30455400  |
| C | -3.78385400 | -4.47519900 | 0.86682500  |
| C | -4.71775300 | 3.29330800  | -0.00188300 |
| C | -4.10841800 | 4.40156900  | 0.48336100  |
| N | -3.55271500 | -2.51687500 | -0.09203400 |
| N | -3.71469300 | 2.38850800  | -0.29378200 |
| H | -4.11005200 | -5.40039700 | 1.31223700  |
| H | -4.51091800 | 5.33559900  | 0.83839400  |
| H | 2.75128400  | -2.53285700 | -0.19886600 |
| C | 3.85430000  | -3.58234000 | -1.71263700 |
| H | 4.25579900  | -4.33566500 | -1.03149100 |
| H | 2.96578900  | -3.99187200 | -2.19948700 |
| H | 4.60226100  | -3.38452700 | -2.48557800 |
| C | 3.45790900  | 1.13275900  | -1.12765300 |
| C | 3.24053400  | 2.07677200  | -0.11537700 |
| C | 4.58793600  | 1.24819100  | -1.94301700 |
| C | 4.13986500  | 3.11385100  | 0.08402600  |
| H | 2.38542500  | 1.96600000  | 0.54112300  |
| C | 5.48372000  | 2.29532800  | -1.74786300 |
| H | 4.77721300  | 0.53357300  | -2.73352000 |
| C | 5.26524200  | 3.22266000  | -0.73327100 |
| H | 3.97388400  | 3.82914600  | 0.88113800  |
| H | 6.35542100  | 2.38172500  | -2.38583500 |
| H | 5.97231000  | 4.02937800  | -0.57622400 |
| C | 4.64925400  | -0.94203100 | 0.97095000  |
| C | 5.94288500  | -0.40261900 | 1.17762400  |
| C | 6.24027500  | 0.42451800  | 2.26678300  |
| C | 5.21396900  | 0.70266300  | 3.15357200  |
| C | 3.92010400  | 0.16931200  | 2.97083100  |
| C | 3.62950600  | -0.64617100 | 1.89117700  |
| C | 4.69551400  | -1.70121600 | -0.25093300 |
| C | 5.98349600  | -1.60912000 | -0.71051900 |
| H | 7.23544100  | 0.83206900  | 2.40471600  |
| H | 5.40841000  | 1.34211300  | 4.00719600  |
| H | 3.14355600  | 0.40946100  | 3.68829500  |
| H | 2.62849800  | -1.04286000 | 1.75072500  |
| H | 1.97566500  | -1.70671400 | -2.37703500 |
| H | 6.43293100  | -2.02490200 | -1.60036600 |
| H | 7.71584700  | -0.62737300 | 0.02978600  |
| N | 6.73277300  | -0.83180800 | 0.14191200  |
| C | -3.73485100 | -0.00265500 | 1.40611300  |
| F | -4.30098100 | -1.06748400 | 1.98161000  |
| F | -4.36013000 | 1.07325900  | 1.89306000  |
| F | -2.46675000 | 0.05049000  | 1.84028700  |



## 2.1.5 Cat4 ((C<sub>4</sub>H<sub>5</sub>N<sub>2</sub>I<sup>+</sup>)<sub>2</sub>C<sub>3</sub>H<sub>6</sub>) catalyzed reaction

### cat4 ((C<sub>4</sub>H<sub>5</sub>N<sub>2</sub>I<sup>+</sup>)<sub>2</sub>C<sub>3</sub>H<sub>6</sub>)

Electronic energy (in solution) = -1242.67080 Hartree

Entropic correction (in solution) = -1242.43833 Hartree

Sum of electronic and thermal Free Energies (in solution) = -1242.44852 Hartree

|   |             |             |             |
|---|-------------|-------------|-------------|
| C | 0.00121000  | 1.67197600  | -0.37273800 |
| C | -1.25075200 | 1.69864400  | -1.24135300 |
| C | 1.23039700  | 1.64262200  | -1.27314900 |
| C | -3.01582600 | 0.50535900  | 0.07163000  |
| N | -4.09097900 | 0.84321300  | 0.78716800  |
| C | 3.01823600  | 0.49351400  | 0.05428900  |
| N | 4.11031000  | 0.85814700  | 0.73055800  |
| I | -2.33336300 | -1.40434900 | -0.20560100 |
| I | 2.32317200  | -1.42455200 | -0.12045000 |
| C | -4.98591000 | -0.08352000 | 1.48319000  |
| H | -4.42403400 | -0.63816500 | 2.23364800  |
| H | -5.43677900 | -0.76412900 | 0.76202900  |
| H | -5.75952800 | 0.50823000  | 1.96509200  |
| C | 5.01353000  | -0.03889600 | 1.45478600  |
| H | 5.46490700  | -0.74283100 | 0.75666400  |
| H | 4.45765700  | -0.56844800 | 2.22738400  |
| H | 5.78633300  | 0.57325300  | 1.91213700  |
| H | -2.94791700 | 3.70559200  | -0.28333700 |
| H | 2.96280000  | 3.67318400  | -0.45472500 |
| C | -3.20969600 | 2.69908300  | -0.00176300 |
| C | -4.22785300 | 2.21248500  | 0.75278600  |
| C | 3.22476800  | 2.67987900  | -0.12963400 |
| C | 4.25551800  | 2.22305700  | 0.62597500  |
| N | -2.46505300 | 1.61970000  | -0.42249700 |
| N | 2.46395900  | 1.58707000  | -0.48106400 |
| H | -5.03693900 | 2.70768300  | 1.26314000  |
| H | 5.07834200  | 2.73610300  | 1.09507400  |
| H | -1.31769900 | 2.62549900  | -1.80952300 |
| H | -1.26722100 | 0.86604500  | -1.94690400 |
| H | 1.21736300  | 0.77924700  | -1.94078300 |
| H | 1.29446500  | 2.54279300  | -1.88336200 |
| H | -0.00965700 | 0.78871300  | 0.27321400  |
| H | 0.02861400  | 2.55686600  | 0.26769100  |

### cat4 -Michael acceptor

Basis set superposition error correction = 0.001218012 Hartree

Electronic energy (in solution) = -1704.91802 Hartree

Entropic correction (in solution) = -1704.52942 Hartree

Sum of electronic and thermal Free Energies (in solution) = -1704.53927 Hartree

|   |             |             |            |
|---|-------------|-------------|------------|
| C | -2.06263200 | -3.29315000 | 1.85003800 |
|---|-------------|-------------|------------|

|   |             |             |             |
|---|-------------|-------------|-------------|
| C | -2.95142800 | -2.86760300 | 0.94474800  |
| H | -3.79613900 | -3.48616100 | 0.66180600  |
| C | -2.82419300 | -1.53505100 | 0.32749200  |
| C | 3.08825900  | 1.24979900  | 0.25522200  |
| C | 3.64832600  | 0.01557000  | 0.95868100  |
| C | 2.59205700  | 2.23549100  | 1.30941900  |
| C | 2.98442100  | -1.92762700 | -0.47532300 |
| N | 3.60387300  | -2.78401000 | -1.29218800 |
| C | 0.60307100  | 3.36845400  | 0.28678100  |
| N | 0.32717100  | 4.58174900  | -0.20023500 |
| I | 0.96377600  | -1.84676800 | -0.09151600 |
| I | -0.66645500 | 1.74863000  | 0.31600000  |
| C | 2.96553000  | -3.87235100 | -2.03386300 |
| H | 2.25208400  | -3.45927800 | -2.74601100 |
| H | 2.46457100  | -4.54221300 | -1.33634800 |
| H | 3.74625100  | -4.41127800 | -2.56448400 |
| C | -0.95703100 | 5.01104800  | -0.75621200 |
| H | -1.73205000 | 4.91891900  | 0.00370100  |
| H | -1.20087600 | 4.40128700  | -1.62539600 |
| H | -0.85467000 | 6.05164100  | -1.05328200 |
| O | -1.75073800 | -0.93282000 | 0.31628100  |
| H | 6.02063100  | -0.86612200 | -0.23326500 |
| H | 3.43827400  | 4.83660200  | 0.74532500  |
| C | 5.13225900  | -1.41334500 | -0.50212000 |
| C | 4.94616900  | -2.47830500 | -1.32223300 |
| C | 2.41951000  | 4.61082400  | 0.47741400  |
| C | 1.44946600  | 5.37160800  | -0.08953400 |
| N | 3.90094200  | -1.08343400 | 0.01866400  |
| N | 1.87606700  | 3.36667900  | 0.70703300  |
| H | 5.63915700  | -3.04907500 | -1.91751900 |
| H | 1.44855100  | 6.39718900  | -0.41870000 |
| H | -1.25649200 | -2.62123200 | 2.13996400  |
| C | -2.10360700 | -4.61992200 | 2.52191100  |
| H | -2.17579500 | -4.48990900 | 3.60585100  |
| H | -2.94191500 | -5.22469800 | 2.17508300  |
| H | -1.16918300 | -5.15826000 | 2.33408800  |
| C | -4.02333200 | -0.91861100 | -0.30333100 |
| C | -3.84127900 | 0.04245500  | -1.30352900 |
| C | -5.31601900 | -1.26288000 | 0.10227200  |
| C | -4.94034700 | 0.65069500  | -1.89411400 |
| H | -2.83706000 | 0.28718300  | -1.63050000 |
| C | -6.41455600 | -0.63747700 | -0.47790700 |
| H | -5.46664400 | -1.99892300 | 0.88344400  |
| C | -6.22775900 | 0.31426900  | -1.47689900 |

|   |             |             |             |
|---|-------------|-------------|-------------|
| H | -4.79728200 | 1.38335900  | -2.67966000 |
| H | -7.41546900 | -0.89459200 | -0.15209500 |
| H | -7.08618500 | 0.79262500  | -1.93456500 |
| H | 4.59872700  | 0.23355600  | 1.44474400  |
| H | 2.95607300  | -0.35185700 | 1.71856800  |
| H | 1.91479100  | 1.74996600  | 2.01460000  |
| H | 3.42091400  | 2.66017500  | 1.87497100  |
| H | 2.26201200  | 0.96048800  | -0.39956100 |
| H | 3.85794500  | 1.71424700  | -0.36508100 |

### COM1

Basis set superposition error correction = 0.003795948 Hartree

Electronic energy (in solution) = -2068.70816 Hartree

Entropic correction (in solution) = -2068.19624 Hartree

Sum of electronic and thermal Free Energies (in solution) = -2068.20604 Hartree

|   |             |             |             |
|---|-------------|-------------|-------------|
| C | -2.67277000 | -2.57249800 | -1.27749200 |
| C | -3.10649700 | -1.30989700 | -1.37276400 |
| H | -4.16091900 | -1.08123100 | -1.26247200 |
| C | -2.17880400 | -0.20445400 | -1.65210000 |
| C | 3.27489900  | 0.23736300  | 1.41512800  |
| C | 3.07464200  | -1.22605900 | 1.79789600  |
| C | 2.42580900  | 1.11826100  | 2.32466300  |
| C | 3.16290800  | -2.46614100 | -0.37320500 |
| N | 4.02780600  | -3.27545200 | -0.99113700 |
| C | 1.77771900  | 3.08116200  | 0.90839300  |
| N | 2.12075400  | 4.36979200  | 0.82552900  |
| I | 1.35689200  | -1.80063800 | -1.10573700 |
| I | 0.43028100  | 2.12786000  | -0.31787300 |
| C | 3.83872000  | -3.88299100 | -2.30920100 |
| H | 3.74392500  | -3.10067100 | -3.06150800 |
| H | 2.94820900  | -4.50996100 | -2.29668000 |
| H | 4.71456200  | -4.49099900 | -2.51997800 |
| C | 1.58152900  | 5.34202100  | -0.12721700 |
| H | 0.50237800  | 5.41680200  | 0.00052500  |
| H | 1.82545900  | 5.03125000  | -1.14252900 |
| H | 2.04487900  | 6.30195000  | 0.08580900  |
| O | -0.96706400 | -0.36471500 | -1.79016600 |
| H | 5.51671600  | -2.59073000 | 1.82975600  |
| H | 3.94245900  | 3.25350700  | 3.29063600  |
| C | 4.91698200  | -2.72748500 | 0.94518100  |
| C | 5.12953100  | -3.45039200 | -0.18356200 |
| C | 3.29033500  | 3.48337200  | 2.46440900  |
| C | 3.06557300  | 4.63929200  | 1.78963800  |
| N | 3.68670400  | -2.12354800 | 0.81180800  |
| N | 2.47755600  | 2.52321200  | 1.90463800  |

|   |             |             |             |
|---|-------------|-------------|-------------|
| H | 5.95381400  | -4.07425100 | -0.48653700 |
| H | 3.48170400  | 5.62600200  | 1.90647500  |
| H | -1.61105400 | -2.76742100 | -1.41236100 |
| C | -3.54204600 | -3.75170100 | -1.01921800 |
| H | -3.15415300 | -4.32641400 | -0.17320000 |
| H | -4.57261400 | -3.45860700 | -0.81300000 |
| H | -3.52577400 | -4.42013200 | -1.88677100 |
| C | -2.73472800 | 1.17573600  | -1.79338000 |
| C | -2.08694200 | 2.07107400  | -2.65174400 |
| C | -3.84269200 | 1.60050900  | -1.05513700 |
| C | -2.54235400 | 3.37828300  | -2.76918600 |
| H | -1.23711800 | 1.72997400  | -3.23348400 |
| C | -4.27819000 | 2.91797300  | -1.15401400 |
| H | -4.35031200 | 0.91500300  | -0.38606100 |
| C | -3.63207700 | 3.80490000  | -2.01218200 |
| H | -2.04813200 | 4.06475000  | -3.44675500 |
| H | -5.12480400 | 3.25072600  | -0.56491400 |
| H | -3.98168000 | 4.82760100  | -2.09562000 |
| C | -3.10002500 | -2.21906000 | 2.09656700  |
| C | -3.52076600 | -0.88092200 | 1.89853600  |
| C | -4.86049700 | -0.49233100 | 2.00890900  |
| C | -5.78442900 | -1.47670500 | 2.31550800  |
| C | -5.38946200 | -2.81645100 | 2.51412300  |
| C | -4.06221100 | -3.19406400 | 2.41026700  |
| C | -1.67662600 | -2.24067700 | 1.89880300  |
| C | -1.30128300 | -0.95780500 | 1.60521800  |
| H | -5.15930200 | 0.53957300  | 1.86146000  |
| H | -6.83183700 | -1.21297500 | 2.40811100  |
| H | -6.14232700 | -3.55868500 | 2.75376800  |
| H | -3.76696300 | -4.22651500 | 2.56449700  |
| H | -1.01928600 | -3.09503800 | 1.96377300  |
| H | -0.32105400 | -0.55576500 | 1.39866500  |
| H | -2.39543700 | 0.85815100  | 1.43090500  |
| N | -2.40361600 | -0.13929700 | 1.59591000  |
| H | 3.53865100  | -1.45347900 | 2.75696800  |
| H | 2.01392400  | -1.47745600 | 1.86600000  |
| H | 1.38029500  | 0.80529700  | 2.31948000  |
| H | 2.78181500  | 1.08890100  | 3.35371600  |
| H | 2.97914300  | 0.39236900  | 0.37383600  |
| H | 4.32924200  | 0.50861500  | 1.50590800  |

**Transition State1 (TS1)**

Imaginary frequency -430.34 cm<sup>-1</sup>

Basis set superposition error correction = 0.004402507 Hartree

Electronic energy (in solution) = -2068.67629 Hartree

Entropic correction (in solution) = -2068.16019 Hartree

Sum of electronic and thermal Free Energies (in solution) = -2068.16994 Hartree

|   |             |             |             |
|---|-------------|-------------|-------------|
| C | 2.70385200  | -2.42147600 | -0.23577000 |
| C | 3.00608600  | -1.42451900 | 0.74180900  |
| H | 3.98111600  | -1.43025200 | 1.21526300  |
| C | 2.09811300  | -0.41450000 | 1.03438400  |
| C | -3.98917500 | 0.28939400  | -1.01322200 |
| C | -3.94348000 | -1.12777800 | -1.58241300 |
| C | -3.44911400 | 1.26707700  | -2.05468500 |
| C | -3.25368000 | -2.59531600 | 0.32422200  |
| N | -3.84611400 | -3.49776600 | 1.11202000  |
| C | -2.20646100 | 3.01317700  | -0.75920200 |
| N | -2.40087500 | 4.29553700  | -0.43665000 |
| I | -1.30787800 | -1.90621900 | 0.46132700  |
| I | -0.64508600 | 1.79583300  | -0.15305100 |
| C | -3.19964400 | -4.23355100 | 2.19913100  |
| H | -2.81110400 | -3.52978600 | 2.93433900  |
| H | -2.39359600 | -4.84589800 | 1.79692400  |
| H | -3.95095100 | -4.86944700 | 2.66066500  |
| C | -1.49982700 | 5.11666700  | 0.37233300  |
| H | -0.50860700 | 5.12359000  | -0.07885800 |
| H | -1.45298100 | 4.71771600  | 1.38531900  |
| H | -1.90194100 | 6.12631600  | 0.39171900  |
| O | 0.93721000  | -0.34316700 | 0.49928700  |
| H | -6.24606400 | -2.56172500 | -0.88911100 |
| H | -5.04273200 | 3.56108100  | -2.20279300 |
| C | -5.36883300 | -2.77277800 | -0.30017400 |
| C | -5.16565700 | -3.62394500 | 0.73672900  |
| C | -4.13081700 | 3.66209500  | -1.63805600 |
| C | -3.59569600 | 4.71853800  | -0.97586500 |
| N | -4.16927700 | -2.14140200 | -0.54505500 |
| N | -3.25366300 | 2.60981400  | -1.49487000 |
| H | -5.83008300 | -4.30753900 | 1.23848300  |
| H | -3.94658500 | 5.72833600  | -0.84303600 |
| H | 1.64306400  | -2.58102300 | -0.41063200 |
| C | 3.50481500  | -3.70201600 | -0.18295800 |
| H | 3.35701800  | -4.32226700 | -1.06803500 |
| H | 4.57020200  | -3.49757500 | -0.06076900 |
| H | 3.17244600  | -4.27132500 | 0.69045700  |
| C | 2.46308600  | 0.65117900  | 2.02456000  |
| C | 1.45916500  | 1.19644700  | 2.83105500  |
| C | 3.77130600  | 1.12849900  | 2.15173800  |
| C | 1.75780200  | 2.19023700  | 3.75731200  |
| H | 0.44553300  | 0.82150000  | 2.73736500  |

|   |             |             |             |
|---|-------------|-------------|-------------|
| C | 4.06767000  | 2.13199200  | 3.06976400  |
| H | 4.55631500  | 0.72806100  | 1.51888800  |
| C | 3.06331300  | 2.66299900  | 3.87614400  |
| H | 0.97374200  | 2.59559200  | 4.38708700  |
| H | 5.08302400  | 2.50313500  | 3.15229500  |
| H | 3.29648800  | 3.44261300  | 4.59246500  |
| C | 4.46737700  | -1.30110700 | -1.93408900 |
| C | 4.39074600  | 0.07151900  | -1.66004700 |
| C | 5.50255700  | 0.86356800  | -1.40250300 |
| C | 6.73823700  | 0.22843500  | -1.43241000 |
| C | 6.84412100  | -1.14211600 | -1.71163200 |
| C | 5.71655700  | -1.91912500 | -1.95753500 |
| C | 3.08728000  | -1.78958600 | -2.02117100 |
| C | 2.28752700  | -0.61386100 | -2.03136500 |
| H | 5.40648000  | 1.92177800  | -1.18969300 |
| H | 7.63646000  | 0.80411800  | -1.24219400 |
| H | 7.82509100  | -1.60208100 | -1.73777400 |
| H | 5.80815200  | -2.97820500 | -2.16958900 |
| H | 2.79076300  | -2.67355700 | -2.56906500 |
| H | 1.21950100  | -0.52212400 | -2.16312700 |
| H | 2.69169500  | 1.37684700  | -1.58700500 |
| N | 3.03743900  | 0.43246000  | -1.72331400 |
| H | -4.71235800 | -1.27782100 | -2.33928200 |
| H | -2.97378000 | -1.33526700 | -2.03903300 |
| H | -2.48778900 | 0.92790700  | -2.44491900 |
| H | -4.13596400 | 1.37531400  | -2.89359800 |
| H | -3.37678100 | 0.34175200  | -0.10938700 |
| H | -5.01223000 | 0.55464400  | -0.73770400 |

## COM2

Basis set superposition error correction = 0.002082718 Hartree

Electronic energy (in solution) = -2068.68307 Hartree

Entropic correction (in solution) = -2068.16499 Hartree

Sum of electronic and thermal Free Energies (in solution) = -2068.17473 Hartree

|   |             |             |             |
|---|-------------|-------------|-------------|
| C | 2.80361500  | -2.43028000 | -0.58607300 |
| C | 2.91919500  | -1.61250300 | 0.66285200  |
| H | 3.77535900  | -1.77513100 | 1.30843300  |
| C | 2.00255200  | -0.65720700 | 0.96845200  |
| C | -3.97094100 | 0.44073900  | -0.90121000 |
| C | -4.01476900 | -0.91418300 | -1.60697500 |
| C | -3.48550600 | 1.49624900  | -1.89304800 |
| C | -3.20624800 | -2.58322200 | 0.07491800  |
| N | -3.75395100 | -3.56709800 | 0.79536800  |
| C | -2.08645600 | 3.09782000  | -0.56987200 |
| N | -2.20766700 | 4.35988200  | -0.14695600 |

|   |             |             |             |
|---|-------------|-------------|-------------|
| I | -1.24355100 | -1.89505600 | 0.15825400  |
| I | -0.53654500 | 1.77669200  | -0.15791400 |
| C | -3.04133700 | -4.42085300 | 1.74572500  |
| H | -2.65376100 | -3.81314400 | 2.56289900  |
| H | -2.22703000 | -4.93374800 | 1.23597600  |
| H | -3.75021100 | -5.14892300 | 2.13234900  |
| C | -1.21252100 | 5.08965400  | 0.63825600  |
| H | -0.27369700 | 5.13225500  | 0.08783000  |
| H | -1.06750300 | 4.59193600  | 1.59665700  |
| H | -1.59121600 | 6.09585800  | 0.79845400  |
| O | 0.94603200  | -0.42213300 | 0.22368100  |
| H | -6.28100400 | -2.39990400 | -0.90392800 |
| H | -5.00067800 | 3.84442100  | -1.74937100 |
| C | -5.36661300 | -2.67810900 | -0.40662800 |
| C | -5.09973000 | -3.64282300 | 0.50904200  |
| C | -4.04612600 | 3.87329700  | -1.25079000 |
| C | -3.42202900 | 4.86147700  | -0.56161500 |
| N | -4.17938100 | -2.02849600 | -0.66552500 |
| N | -3.20244200 | 2.78377100  | -1.24680000 |
| H | -5.73432500 | -4.37620400 | 0.97798100  |
| H | -3.72169300 | 5.87054500  | -0.33261500 |
| H | 1.75332400  | -2.67473700 | -0.77311200 |
| C | 3.60714500  | -3.72466000 | -0.50511600 |
| H | 3.57443100  | -4.27731800 | -1.44709700 |
| H | 4.65123800  | -3.52771300 | -0.25186500 |
| H | 3.19175300  | -4.35866000 | 0.28189800  |
| C | 2.15435400  | 0.17594900  | 2.20491300  |
| C | 1.01480400  | 0.53749500  | 2.93128100  |
| C | 3.40427600  | 0.61799900  | 2.65101900  |
| C | 1.12178400  | 1.30500700  | 4.08690600  |
| H | 0.04213900  | 0.19950200  | 2.58932600  |
| C | 3.51207800  | 1.39202500  | 3.80330000  |
| H | 4.29456400  | 0.36731200  | 2.08363400  |
| C | 2.37205100  | 1.73649600  | 4.52610400  |
| H | 0.23005300  | 1.56701800  | 4.64572600  |
| H | 4.48700700  | 1.73433100  | 4.13228500  |
| H | 2.45647300  | 2.34037400  | 5.42247600  |
| C | 4.58768200  | -0.93955300 | -1.74460000 |
| C | 4.38446400  | 0.43896000  | -1.71384700 |
| C | 5.38837200  | 1.37199700  | -1.53879600 |
| C | 6.67902800  | 0.86536100  | -1.39476200 |
| C | 6.91976700  | -0.50886800 | -1.43889100 |
| C | 5.88011000  | -1.42559200 | -1.61321700 |
| C | 3.24396900  | -1.60625700 | -1.87304300 |

|   |             |             |             |
|---|-------------|-------------|-------------|
| C | 2.34157200  | -0.44019300 | -2.04873600 |
| H | 5.18047100  | 2.43481300  | -1.51995300 |
| H | 7.50648100  | 1.55075900  | -1.25613200 |
| H | 7.93565300  | -0.87253200 | -1.33903600 |
| H | 6.08830500  | -2.48746000 | -1.65487000 |
| H | 3.15661000  | -2.27902600 | -2.73205500 |
| H | 1.28351400  | -0.45783700 | -2.26516300 |
| H | 2.58313200  | 1.59656700  | -1.99005200 |
| N | 2.99692200  | 0.66828200  | -1.92029700 |
| H | -4.84931300 | -0.96994400 | -2.30506400 |
| H | -3.09353500 | -1.08995000 | -2.16547100 |
| H | -2.57051900 | 1.16925600  | -2.39071000 |
| H | -4.23418000 | 1.69132900  | -2.65995500 |
| H | -3.28658900 | 0.39110100  | -0.05104100 |
| H | -4.96001900 | 0.70350600  | -0.51972000 |

**The indirect hydrogen proton transfer reaction pathway  
Transition State2 TS2(a)**

Imaginary frequency  $-257.09 \text{ cm}^{-1}$

Basis set superposition error correction = 0.002401873 Hartree

Electronic energy (in solution) = -2068.67488 Hartree

Entropic correction (in solution) = -2068.16354 Hartree

Sum of electronic and thermal Free Energies (in solution) = -2068.17334 Hartree

|   |             |             |             |
|---|-------------|-------------|-------------|
| C | -2.69230200 | -2.85687000 | -1.87743400 |
| C | -2.00264700 | -3.36913500 | -0.63697100 |
| H | -2.37587400 | -4.28937600 | -0.20304900 |
| C | -1.00233800 | -2.69672300 | -0.01580500 |
| C | 2.58251100  | 2.68114600  | -0.32133300 |
| C | 1.41347500  | 3.51675700  | -0.83702500 |
| C | 3.32097500  | 2.07222000  | -1.51184300 |
| C | -0.42822500 | 3.21400000  | 0.83504100  |
| N | -1.00465200 | 3.95924100  | 1.78270900  |
| C | 3.97806400  | -0.22385900 | -0.77584100 |
| N | 5.11581100  | -0.84183400 | -0.44253100 |
| I | -0.86601500 | 1.24660200  | 0.40254400  |
| I | 2.05359300  | -1.00971200 | -0.69647500 |
| C | -2.09170100 | 3.52801100  | 2.66256000  |
| H | -1.74621800 | 2.71013300  | 3.29426700  |
| H | -2.94229800 | 3.20948200  | 2.06055600  |
| H | -2.37369400 | 4.37777500  | 3.27916000  |
| C | 5.23063800  | -2.23697200 | -0.01861600 |
| H | 4.87899400  | -2.89169300 | -0.81482300 |
| H | 4.64387200  | -2.39262400 | 0.88619700  |
| H | 6.27991100  | -2.43514400 | 0.18448400  |
| O | -0.53467600 | -1.53081100 | -0.44970200 |



|   |             |             |             |
|---|-------------|-------------|-------------|
| H | 1.24990800  | 5.95231100  | 0.52477500  |
| H | 6.10324900  | 2.17828800  | -1.17798000 |
| C | 0.55691300  | 5.19233200  | 0.84546900  |
| C | -0.40299500 | 5.19782900  | 1.80455900  |
| C | 5.63983900  | 1.22982400  | -0.96225900 |
| C | 6.16316100  | 0.04668800  | -0.55372200 |
| N | 0.52775200  | 3.95046800  | 0.25039800  |
| N | 4.28089100  | 1.04387600  | -1.09570900 |
| H | -0.71745900 | 5.96311300  | 2.49424200  |
| H | 7.17665400  | -0.24785500 | -0.33818900 |
| H | -2.07975900 | -3.07353000 | -2.76292900 |
| C | -4.06625800 | -3.49661100 | -2.07027300 |
| H | -4.55102800 | -3.11630100 | -2.97322100 |
| H | -3.96836900 | -4.58130100 | -2.16121700 |
| H | -4.71330800 | -3.28491900 | -1.21447400 |
| C | -0.39982800 | -3.21459000 | 1.25359400  |
| C | 0.12069100  | -2.31324000 | 2.18818100  |
| C | -0.32458000 | -4.58417200 | 1.53507300  |
| C | 0.67478500  | -2.76299700 | 3.38329900  |
| H | 0.08633900  | -1.25137100 | 1.97439700  |
| C | 0.23449400  | -5.03531400 | 2.72611900  |
| H | -0.68901300 | -5.30362900 | 0.81043400  |
| C | 0.73351200  | -4.12674600 | 3.65777800  |
| H | 1.06390900  | -2.04737300 | 4.09920200  |
| H | 0.29033900  | -6.10017600 | 2.92301000  |
| H | 1.17125800  | -4.47995400 | 4.58448700  |
| C | -3.66158200 | -0.59593300 | -0.85201700 |
| C | -4.10446200 | 0.57168400  | -1.48269700 |
| C | -4.83885200 | 1.56245800  | -0.84676200 |
| C | -5.15088800 | 1.33778800  | 0.48865100  |
| C | -4.73373800 | 0.17035900  | 1.14304100  |
| C | -3.98157900 | -0.80070300 | 0.48936700  |
| C | -2.79151600 | -1.31945100 | -1.81623800 |
| C | -2.91303200 | -0.53711400 | -3.02154400 |
| H | -5.14722400 | 2.46140000  | -1.36677600 |
| H | -5.72673500 | 2.07761700  | 1.03205800  |
| H | -4.99809500 | 0.02617600  | 2.18428800  |
| H | -3.64710400 | -1.69015200 | 1.01014300  |
| H | -1.69194000 | -1.09832200 | -1.42666800 |
| H | -2.46555100 | -0.73089900 | -3.98817200 |
| H | -3.77907900 | 1.27686800  | -3.49125500 |
| N | -3.62185500 | 0.54257400  | -2.80490700 |
| H | 1.76003600  | 4.42130500  | -1.33579700 |
| H | 0.81077700  | 2.94842600  | -1.54803700 |

|   |            |            |             |
|---|------------|------------|-------------|
| H | 2.62089700 | 1.60482100 | -2.20627300 |
| H | 3.88516400 | 2.82796800 | -2.05726400 |
| H | 2.20632300 | 1.88513500 | 0.32642400  |
| H | 3.26003300 | 3.30089200 | 0.27011200  |

**COM3(a)**

Basis set superposition error correction = 0.002047154 Hartree

Electronic energy (in solution) = -2068.71694 Hartree

Entropic correction (in solution) = -2068.19975 Hartree

Sum of electronic and thermal Free Energies (in solution) = -2068.20954 Hartree

|   |             |             |             |
|---|-------------|-------------|-------------|
| C | -3.26888100 | -2.87621100 | -1.63074600 |
| C | -2.52550400 | -3.26889000 | -0.37008900 |
| H | -2.94391100 | -4.08545400 | 0.20827000  |
| C | -1.40405000 | -2.71496400 | 0.10059200  |
| C | 2.73568900  | 2.47715900  | -0.34062700 |
| C | 1.63603800  | 3.40538200  | -0.84613300 |
| C | 3.44414600  | 1.84763100  | -1.53673600 |
| C | -0.21341100 | 3.24189200  | 0.83421400  |
| N | -0.72097700 | 4.01819800  | 1.79545000  |
| C | 4.03283300  | -0.46481600 | -0.78406000 |
| N | 5.14564800  | -1.11839400 | -0.43901300 |
| I | -0.86077500 | 1.35041000  | 0.36980000  |
| I | 2.11899600  | -1.21731200 | -0.74074500 |
| C | -1.84189800 | 3.66947400  | 2.67015900  |
| H | -1.55759400 | 2.83575200  | 3.31163400  |
| H | -2.70638300 | 3.40418500  | 2.06225200  |
| H | -2.07158300 | 4.54185500  | 3.27616900  |
| C | 5.22051300  | -2.51424800 | -0.00503300 |
| H | 4.87403100  | -3.16545000 | -0.80638400 |
| H | 4.61206300  | -2.65078700 | 0.88827500  |
| H | 6.26107200  | -2.73104300 | 0.22178800  |
| O | -0.77255100 | -1.65045200 | -0.51039700 |
| H | 1.69595700  | 5.82398200  | 0.55518500  |
| H | 6.22450000  | 1.86378900  | -1.20350500 |
| C | 0.94017600  | 5.12303100  | 0.86839600  |
| C | -0.01146200 | 5.19782500  | 1.83327900  |
| C | 5.73210100  | 0.93168700  | -0.98058400 |
| C | 6.21774000  | -0.26258200 | -0.55680500 |
| N | 0.79888200  | 3.89885700  | 0.25317200  |
| N | 4.36949400  | 0.78819800  | -1.11838900 |
| H | -0.25521200 | 5.97719600  | 2.53562000  |
| H | 7.22092500  | -0.58566000 | -0.33393400 |
| H | -2.73271500 | -3.29455000 | -2.49247100 |
| C | -4.67570600 | -3.49157800 | -1.60968900 |
| H | -5.20512800 | -3.26492700 | -2.53706200 |

|   |             |             |             |
|---|-------------|-------------|-------------|
| H | -4.61759700 | -4.57708800 | -1.49695900 |
| H | -5.25531400 | -3.09029500 | -0.77383100 |
| C | -0.70812700 | -3.14997200 | 1.33365700  |
| C | -0.00960200 | -2.22379600 | 2.11472300  |
| C | -0.73384400 | -4.48988500 | 1.73790100  |
| C | 0.63364000  | -2.62284100 | 3.28228500  |
| H | 0.02413500  | -1.18291800 | 1.81723000  |
| C | -0.09246400 | -4.88641400 | 2.90545400  |
| H | -1.24213900 | -5.22732900 | 1.12744900  |
| C | 0.59336600  | -3.95497700 | 3.68269100  |
| H | 1.16452200  | -1.88976400 | 3.87899700  |
| H | -0.11751100 | -5.92866900 | 3.20219600  |
| H | 1.09739300  | -4.26755500 | 4.58994600  |
| C | -3.85022600 | -0.38634000 | -0.92919500 |
| C | -3.85427800 | 0.84893200  | -1.62368900 |
| C | -4.28204800 | 2.04101400  | -1.03027200 |
| C | -4.69902200 | 1.98085800  | 0.28759600  |
| C | -4.69099500 | 0.76605100  | 1.00492100  |
| C | -4.27461400 | -0.41349900 | 0.41226900  |
| C | -3.35395200 | -1.38413500 | -1.84865200 |
| C | -3.07073700 | -0.71921300 | -3.01558500 |
| H | -4.27909500 | 2.97293600  | -1.58433100 |
| H | -5.03865900 | 2.88509300  | 0.78012900  |
| H | -5.02179500 | 0.75998700  | 2.03729300  |
| H | -4.27856000 | -1.34399500 | 0.96950800  |
| H | -1.29419600 | -1.37779100 | -1.28600700 |
| H | -2.68579000 | -1.10832400 | -3.94715100 |
| H | -3.24828500 | 1.31119800  | -3.60756500 |
| N | -3.36817800 | 0.61455600  | -2.88540300 |
| H | 2.05149200  | 4.28340600  | -1.33942400 |
| H | 0.98473100  | 2.89296600  | -1.55666500 |
| H | 2.72702400  | 1.40674900  | -2.23176800 |
| H | 4.03563100  | 2.58333900  | -2.08044800 |
| H | 2.29674700  | 1.69563400  | 0.28563900  |
| H | 3.44936600  | 3.03362600  | 0.27104400  |

**P(a)**

Electronic energy (in solution) = -826.02516 Hartree

Entropic correction (in solution) = -825.75400 Hartree

Sum of electronic and thermal Free Energies (in solution) = -825.76429 Hartree

|   |             |            |             |
|---|-------------|------------|-------------|
| C | 0.68286700  | 2.12567600 | 0.28722200  |
| C | -0.66510200 | 1.45540200 | 0.47252200  |
| H | -1.14547200 | 1.56240400 | 1.43855200  |
| C | -1.30001400 | 0.73405600 | -0.46127200 |
| O | -0.78164900 | 0.48299300 | -1.69880900 |

|   |             |             |             |
|---|-------------|-------------|-------------|
| H | 0.57490800  | 2.92820000  | -0.45446800 |
| C | 1.13886600  | 2.76049600  | 1.60726200  |
| H | 2.08332500  | 3.29129600  | 1.47195500  |
| H | 0.39008600  | 3.46887700  | 1.97108800  |
| H | 1.28220400  | 1.99183500  | 2.37177100  |
| C | -2.62490600 | 0.09665800  | -0.26801900 |
| C | -2.96797400 | -1.03544800 | -1.01506300 |
| C | -3.54990200 | 0.60327500  | 0.65295600  |
| C | -4.19775100 | -1.66012800 | -0.82799100 |
| H | -2.26429000 | -1.42918200 | -1.73803600 |
| C | -4.77622800 | -0.02340400 | 0.83878000  |
| H | -3.31808800 | 1.50072700  | 1.21481200  |
| C | -5.10496000 | -1.15943700 | 0.10095000  |
| H | -4.44574200 | -2.54053600 | -1.41014100 |
| H | -5.48279500 | 0.38362800  | 1.55323600  |
| H | -6.06388800 | -1.64417900 | 0.24428700  |
| C | 2.10706200  | -0.10468400 | 0.29483700  |
| C | 3.15781300  | -0.60399300 | -0.51354300 |
| C | 3.76227200  | -1.84301100 | -0.27353000 |
| C | 3.29457600  | -2.58200400 | 0.79891500  |
| C | 2.24950200  | -2.10540100 | 1.61797000  |
| C | 1.65348500  | -0.87976300 | 1.37702900  |
| C | 1.73412600  | 1.18064600  | -0.24538200 |
| C | 2.55281700  | 1.39242600  | -1.32581600 |
| H | 4.56487200  | -2.20510500 | -0.90601000 |
| H | 3.73987100  | -3.54663100 | 1.01455500  |
| H | 1.91073800  | -2.71331100 | 2.44909800  |
| H | 0.85049700  | -0.52165600 | 2.01217900  |
| H | 0.15775000  | 0.72138600  | -1.70832300 |
| H | 2.59078000  | 2.23592900  | -2.00031700 |
| H | 4.09709400  | 0.24231500  | -2.22160800 |
| N | 3.40743600  | 0.32884100  | -1.48844600 |

**The direct hydrogen proton transfer reaction pathway**

**Transition State2 TS2(b)**

Imaginary frequency -1480.82 cm<sup>-1</sup>

Basis set superposition error correction = 0.001812631 Hartree

Electronic energy (in solution) = -2068.63780 Hartree

Entropic correction (in solution) = -2068.12857 Hartree

Sum of electronic and thermal Free Energies (in solution) = -2068.13829 Hartree

|   |             |             |             |
|---|-------------|-------------|-------------|
| C | 3.02904800  | -2.06940400 | 0.53203700  |
| C | 3.03900300  | -0.96665200 | 1.59120900  |
| H | 3.83630700  | -0.95304000 | 2.32597300  |
| C | 1.94456400  | -0.11611800 | 1.72193500  |
| C | -3.66383300 | 0.03308200  | -1.45733800 |

|   |             |             |             |
|---|-------------|-------------|-------------|
| C | -3.43580400 | -1.40679900 | -1.91273900 |
| C | -3.01706600 | 0.98269800  | -2.46336000 |
| C | -3.05522700 | -2.72311200 | 0.18256100  |
| N | -3.73890200 | -3.62345900 | 0.89502600  |
| C | -2.10734400 | 2.87646400  | -1.10333000 |
| N | -2.42003500 | 4.16026300  | -0.90390400 |
| I | -1.21204400 | -1.90909200 | 0.64697800  |
| I | -0.60955900 | 1.80217100  | -0.16157100 |
| C | -3.28047000 | -4.25962000 | 2.13046100  |
| H | -3.12436600 | -3.50012100 | 2.89572500  |
| H | -2.35611900 | -4.80333800 | 1.94009000  |
| H | -4.05517300 | -4.95120300 | 2.45135400  |
| C | -1.70431600 | 5.08232700  | -0.02172000 |
| H | -0.67953500 | 5.20139500  | -0.37130000 |
| H | -1.71532500 | 4.69392600  | 0.99606500  |
| H | -2.21925200 | 6.03898500  | -0.05584300 |
| O | 0.91621700  | -0.20151600 | 0.96749300  |
| H | -5.74656600 | -2.95245000 | -1.58643400 |
| H | -4.68050000 | 3.16312600  | -3.03335400 |
| C | -4.99242900 | -3.07322000 | -0.82644900 |
| C | -4.95008000 | -3.85567400 | 0.28126600  |
| C | -3.88387900 | 3.35309900  | -2.33332500 |
| C | -3.52468200 | 4.47712600  | -1.66352100 |
| N | -3.80532300 | -2.37605500 | -0.87419400 |
| N | -2.99145600 | 2.36660300  | -1.97417000 |
| H | -5.66061300 | -4.55610400 | 0.68743300  |
| H | -3.94484200 | 5.46894300  | -1.65816600 |
| H | 2.02316200  | -2.48283100 | 0.41631800  |
| C | 4.00935700  | -3.19268900 | 0.83336900  |
| H | 4.12032000  | -3.86387600 | -0.02107000 |
| H | 4.99269600  | -2.80339100 | 1.10248900  |
| H | 3.64139800  | -3.77259300 | 1.68323000  |
| C | 1.97122400  | 0.98664700  | 2.73748600  |
| C | 0.75834400  | 1.42200800  | 3.28003300  |
| C | 3.15905200  | 1.59674300  | 3.15270100  |
| C | 0.73211000  | 2.44071800  | 4.22735700  |
| H | -0.16268200 | 0.94454400  | 2.96329500  |
| C | 3.13145800  | 2.62181200  | 4.09289100  |
| H | 4.10577900  | 1.28438500  | 2.72643400  |
| C | 1.91914600  | 3.04559800  | 4.63382600  |
| H | -0.21386300 | 2.76240800  | 4.64833400  |
| H | 4.05734300  | 3.09581700  | 4.39855900  |
| H | 1.90033600  | 3.84443900  | 5.36651900  |
| C | 4.60891600  | -1.07934400 | -1.47242800 |

|   |             |             |             |
|---|-------------|-------------|-------------|
| C | 4.28333600  | -0.36140800 | -2.63857000 |
| C | 5.22884800  | 0.04686200  | -3.57548900 |
| C | 6.54722200  | -0.30099800 | -3.32850400 |
| C | 6.90030800  | -1.02121300 | -2.17577800 |
| C | 5.95003100  | -1.40580400 | -1.24020500 |
| C | 3.35394000  | -1.23487000 | -0.71419100 |
| C | 2.35177200  | -0.69800200 | -1.56036900 |
| H | 4.93831400  | 0.60834800  | -4.45555900 |
| H | 7.31713300  | -0.01157200 | -4.03388200 |
| H | 7.94006900  | -1.27912800 | -2.01160400 |
| H | 6.25221500  | -1.94691200 | -0.35386100 |
| H | 3.40613200  | -0.28367600 | 0.20711900  |
| H | 1.28505000  | -0.68162800 | -1.39687400 |
| H | 2.40109600  | 0.34853400  | -3.36329300 |
| N | 2.90707700  | -0.15860900 | -2.64528000 |
| H | -4.03456900 | -1.64515700 | -2.79119400 |
| H | -2.38655100 | -1.57493500 | -2.16256500 |
| H | -1.98671500 | 0.68801300  | -2.67048300 |
| H | -3.56161900 | 0.99353100  | -3.40668200 |
| H | -3.21575700 | 0.18166200  | -0.47160500 |
| H | -4.73293300 | 0.24008600  | -1.37290500 |

### COM3(b)

Basis set superposition error correction = 0.001234776957 Hartree

Electronic energy (in solution) = -2068.73462 Hartree

Entropic correction (in solution) = -2068.21811 Hartree

Sum of electronic and thermal Free Energies (in solution) = -2068.22867 Hartree

|   |             |             |             |
|---|-------------|-------------|-------------|
| C | -2.97141400 | 2.35285600  | -0.80035300 |
| C | -2.42560000 | 1.39427200  | -1.89648000 |
| H | -3.18322100 | 1.28832200  | -2.67333200 |
| C | -2.03576700 | 0.06289000  | -1.30677600 |
| C | 4.35827400  | 0.06520300  | -0.04672000 |
| C | 4.40834400  | 1.33665900  | -0.88958200 |
| C | 4.48613800  | -1.14655700 | -0.96567300 |
| C | 2.83340600  | 2.93086300  | 0.22485900  |
| N | 2.93704900  | 4.04607600  | 0.95270400  |
| C | 3.02356700  | -2.90766300 | 0.05222700  |
| N | 3.20732500  | -4.05367200 | 0.71398500  |
| I | 1.09417700  | 1.94475600  | -0.27002700 |
| I | 1.21447000  | -2.02061900 | -0.36534100 |
| C | 1.81893500  | 4.80916700  | 1.51032500  |
| H | 2.23415400  | 5.66649800  | 2.03404700  |
| H | 1.26389500  | 4.18365300  | 2.20868300  |
| H | 1.17084300  | 5.14763300  | 0.70287000  |
| C | 2.15176900  | -4.93194100 | 1.22033200  |

|   |             |             |             |
|---|-------------|-------------|-------------|
| H | 1.56701700  | -4.40448600 | 1.97292500  |
| H | 2.63303000  | -5.79784100 | 1.66773700  |
| H | 1.51567100  | -5.24927400 | 0.39513700  |
| O | -0.91349000 | -0.06792800 | -0.82822200 |
| H | 6.03917100  | 3.28218900  | 0.29136300  |
| H | 6.24577700  | -3.03333100 | 0.10833700  |
| C | 4.97918600  | 3.41101300  | 0.43560700  |
| C | 4.26995000  | 4.36229500  | 1.09430100  |
| C | 5.19782700  | -3.24562100 | 0.24155400  |
| C | 4.55897500  | -4.28126300 | 0.84207100  |
| N | 4.06925300  | 2.52733600  | -0.10081800 |
| N | 4.22736100  | -2.40019500 | -0.24728800 |
| H | 4.58449100  | 5.23350700  | 1.64438300  |
| H | 4.93517100  | -5.15817900 | 1.34203800  |
| H | -2.16789100 | 2.51167600  | -0.07185100 |
| C | -3.32462600 | 3.69336500  | -1.44128000 |
| H | -3.66794700 | 4.40257400  | -0.68507900 |
| H | -2.45479100 | 4.11903300  | -1.94771700 |
| H | -4.11999700 | 3.56957500  | -2.18162400 |
| C | -3.01427700 | -1.05880200 | -1.22188900 |
| C | -2.76852900 | -2.08346700 | -0.29872200 |
| C | -4.18974600 | -1.08555200 | -1.97838100 |
| C | -3.68297100 | -3.11282600 | -0.12954300 |
| H | -1.87698000 | -2.04381100 | 0.31582300  |
| C | -5.10153300 | -2.12419700 | -1.81463500 |
| H | -4.40357300 | -0.30743700 | -2.69939300 |
| C | -4.85350700 | -3.13278900 | -0.88842900 |
| H | -3.49277600 | -3.89187300 | 0.59951200  |
| H | -6.00836400 | -2.14074500 | -2.40773200 |
| H | -5.57195300 | -3.93361000 | -0.75445800 |
| C | -4.03308200 | 0.87583800  | 1.08226200  |
| C | -5.32516800 | 0.34626700  | 1.32154000  |
| C | -5.58062500 | -0.55507900 | 2.36137500  |
| C | -4.51272700 | -0.92036900 | 3.16342500  |
| C | -3.21869700 | -0.40015600 | 2.94633900  |
| C | -2.97034100 | 0.49064300  | 1.91688700  |
| C | -4.12976000 | 1.72537900  | -0.07565900 |
| C | -5.44272900 | 1.69127600  | -0.46722200 |
| H | -6.57564200 | -0.95331800 | 2.52518100  |
| H | -4.67346400 | -1.61983000 | 3.97602900  |
| H | -2.40887600 | -0.71036100 | 3.59711300  |
| H | -1.96965200 | 0.87747700  | 1.74846900  |
| H | -1.52943500 | 1.83224700  | -2.34374500 |
| H | -5.93085300 | 2.17978600  | -1.29776500 |

|   |             |             |             |
|---|-------------|-------------|-------------|
| H | -7.15277500 | 0.68721200  | 0.29428000  |
| N | -6.16105900 | 0.86625100  | 0.36670700  |
| H | 5.16444200  | 0.06798500  | 0.69028200  |
| H | 3.77907000  | -1.08806800 | -1.79535300 |
| H | 5.49027000  | -1.22748800 | -1.38048600 |
| H | 5.40565900  | 1.50360000  | -1.29470900 |
| H | 3.70718000  | 1.28391500  | -1.72472600 |
| H | 3.41085400  | 0.01615100  | 0.49647600  |

### 2.1.6 Cat2 ((C<sub>4</sub>H<sub>5</sub>N<sub>2</sub>I<sup>+</sup>)<sub>2</sub>C<sub>6</sub>H<sub>4</sub>) catalyzed reaction—a water-bridge mechanism

#### H<sub>2</sub>O

Electronic energy (in solution) = -76.40817 Hartree

Entropic correction (in solution) = -76.41322 Hartree

Sum of electronic and thermal Free Energies (in solution) = -76.42582 Hartree

|   |            |             |             |
|---|------------|-------------|-------------|
| O | 0.00000000 | 0.00000000  | 0.11788000  |
| H | 0.00000000 | 0.76093400  | -0.47151900 |
| H | 0.00000000 | -0.76093400 | -0.47151900 |

#### TS3(c)

Imaginary frequency -415.24 cm<sup>-1</sup>

Basis set superposition error correction = 0.004723446 Hartree

Electronic energy (in solution) = -2257.59218 Hartree

Entropic correction (in solution) = -2257.66382 Hartree

Sum of electronic and thermal Free Energies (in solution) = -2257.67351 Hartree

|   |             |             |             |
|---|-------------|-------------|-------------|
| C | 3.19659800  | -1.40344700 | 0.10257600  |
| C | 3.09980100  | -0.20756800 | 1.02647400  |
| H | 3.96109900  | 0.01537700  | 1.64638300  |
| C | 1.94679500  | 0.49003900  | 1.23665300  |
| H | -3.80380300 | -0.11109900 | 0.38520200  |
| C | -3.84153700 | -0.47497500 | -0.63516700 |
| C | -4.05004300 | -1.42222300 | -3.26136000 |
| C | -3.78810200 | -1.83510200 | -0.91523500 |
| C | -3.96341800 | 0.40028200  | -1.70732600 |
| C | -4.07201200 | -0.05440900 | -3.01573000 |
| C | -3.89455200 | -2.32081000 | -2.21227100 |
| H | -4.16614800 | 0.65849200  | -3.82663200 |
| H | -3.84891100 | -3.38870000 | -2.39197400 |
| C | -2.55148500 | -2.89469400 | 0.96139400  |
| N | -2.78660200 | -3.90807500 | 1.79590600  |
| C | -2.98842900 | 2.56738600  | -0.97399100 |
| N | -3.40383700 | 3.83473200  | -0.96336900 |
| I | -0.86852900 | -1.67581000 | 0.88189900  |
| I | -1.16183700 | 1.83799200  | -0.31446600 |
| C | -1.87660800 | -4.37043900 | 2.84494000  |
| H | -1.69206500 | -3.55931300 | 3.54810300  |



|   |             |             |             |
|---|-------------|-------------|-------------|
| H | -0.94247100 | -4.70471100 | 2.39567000  |
| H | -2.35904200 | -5.19907200 | 3.35671900  |
| C | -2.62077700 | 4.97875500  | -0.49305200 |
| H | -1.70111400 | 5.05170000  | -1.07169000 |
| H | -2.39449000 | 4.85431100  | 0.56520500  |
| H | -3.22117400 | 5.87275700  | -0.64092000 |
| O | 0.84131600  | 0.29105000  | 0.55014400  |
| H | -4.13370900 | -1.78859500 | -4.27663300 |
| H | -5.49107300 | -3.83754700 | -0.02948600 |
| H | -5.96888600 | 2.24504500  | -2.20553600 |
| C | -4.55186200 | -3.75180100 | 0.49097000  |
| C | -4.02211300 | -4.45599000 | 1.51915100  |
| C | -5.05725700 | 2.64132800  | -1.79063300 |
| C | -4.68609100 | 3.90287900  | -1.46780100 |
| N | -3.62865800 | -2.77643400 | 0.15868700  |
| N | -3.99288600 | 1.81761500  | -1.47106100 |
| H | -4.40695200 | -5.28887400 | 2.08362800  |
| H | -5.21087700 | 4.84048100  | -1.54388500 |
| H | 2.19663000  | -1.59981800 | -0.29786000 |
| C | 3.65253900  | -2.64207100 | 0.89262000  |
| H | 3.69902600  | -3.52019500 | 0.24369400  |
| H | 4.64479300  | -2.47871100 | 1.32203500  |
| H | 2.95518300  | -2.84554200 | 1.70908200  |
| C | 1.89428700  | 1.57013800  | 2.27870000  |
| C | 0.68720800  | 1.80232400  | 2.94502400  |
| C | 3.00313700  | 2.36025400  | 2.59913700  |
| C | 0.59396300  | 2.78658400  | 3.92463300  |
| H | -0.17724300 | 1.19618700  | 2.69666900  |
| C | 2.90812800  | 3.35074300  | 3.57201700  |
| H | 3.94058200  | 2.21275300  | 2.07367600  |
| C | 1.70449400  | 3.56565600  | 4.24033000  |
| H | -0.34639800 | 2.94664200  | 4.44036800  |
| H | 3.77365300  | 3.96169700  | 3.80282300  |
| H | 1.63168300  | 4.33852200  | 4.99705000  |
| C | 5.50036100  | -0.78368200 | -1.08314100 |
| C | 5.94675000  | -0.82585200 | -2.42544600 |
| C | 7.25268700  | -0.48075400 | -2.79343400 |
| C | 8.11560500  | -0.10225300 | -1.78233800 |
| C | 7.69780800  | -0.06527900 | -0.43500800 |
| C | 6.40496100  | -0.39956300 | -0.07650400 |
| C | 4.11059200  | -1.18903300 | -1.08731200 |
| C | 3.79986800  | -1.45703800 | -2.40533600 |
| H | 7.56874400  | -0.51619300 | -3.82952200 |
| H | 9.13623000  | 0.16808600  | -2.02783200 |

|   |            |             |             |
|---|------------|-------------|-------------|
| H | 8.40710500 | 0.22961500  | 0.32951800  |
| H | 6.09896700 | -0.37294000 | 0.96274300  |
| H | 3.18860900 | 0.36189000  | -1.78215800 |
| H | 2.87179300 | -1.81905500 | -2.82610300 |
| H | 4.91015200 | -1.34137200 | -4.20882500 |
| N | 4.89442500 | -1.23986000 | -3.20306700 |
| O | 2.65107800 | 1.20224700  | -1.55649500 |
| H | 2.46242600 | 1.10460600  | -0.57784400 |
| H | 3.20308400 | 1.99940000  | -1.70566100 |

### COM3(c)

Basis set superposition error correction = -0.024714515 Hartree

Electronic energy (in solution) = -2257.66068 Hartree

Entropic correction (in solution) = -2257.73270 Hartree

Sum of electronic and thermal Free Energies (in solution) = -2257.74239 Hartree

|   |             |             |             |
|---|-------------|-------------|-------------|
| C | 3.04513400  | -0.51142700 | 0.13703000  |
| C | 3.01891400  | 1.02001000  | 0.16680900  |
| H | 3.84598100  | 1.42082100  | 0.76075700  |
| C | 1.72576000  | 1.60593900  | 0.67213600  |
| H | -3.87472000 | -0.91670700 | 0.58593300  |
| C | -3.81299200 | -1.24127700 | -0.44691800 |
| C | -3.76524500 | -2.12485900 | -3.10564400 |
| C | -3.37948900 | -2.51914300 | -0.77529100 |
| C | -4.19366000 | -0.40757100 | -1.49035100 |
| C | -4.17845300 | -0.83050600 | -2.81357000 |
| C | -3.35289700 | -2.97532800 | -2.08656100 |
| H | -4.48359700 | -0.14905100 | -3.59908700 |
| H | -3.00883400 | -3.98075300 | -2.29913700 |
| C | -1.87250500 | -3.27369200 | 1.04783600  |
| N | -1.81634600 | -4.32671200 | 1.86300300  |
| C | -3.90751400 | 1.92008700  | -0.66535800 |
| N | -4.67274800 | 3.01030100  | -0.61298700 |
| I | -0.52812000 | -1.72254400 | 0.97284600  |
| I | -1.95325400 | 1.78160900  | -0.04405600 |
| C | -0.77801100 | -4.57271900 | 2.86658400  |
| H | -0.73722300 | -3.73235600 | 3.55826100  |
| H | 0.18238100  | -4.70594400 | 2.36988500  |
| H | -1.04623400 | -5.47882300 | 3.40318900  |
| C | -4.25881700 | 4.32187700  | -0.10852400 |
| H | -3.45493400 | 4.71262500  | -0.73129800 |
| H | -3.92961000 | 4.22622300  | 0.92514800  |
| H | -5.12166900 | 4.98052500  | -0.16139300 |
| O | 0.71484400  | 0.92606000  | 0.79606400  |
| H | -3.74849200 | -2.46618700 | -4.13273300 |
| H | -4.49905300 | -4.90324100 | 0.09370500  |

|   |             |             |             |
|---|-------------|-------------|-------------|
| H | -6.65069500 | 0.78448800  | -1.95044100 |
| C | -3.59811000 | -4.59396500 | 0.59707000  |
| C | -2.88112700 | -5.16153500 | 1.59696300  |
| C | -5.89680700 | 1.41524900  | -1.50948600 |
| C | -5.91443200 | 2.71702800  | -1.13514500 |
| N | -2.96054500 | -3.41232000 | 0.26898300  |
| N | -4.63947700 | 0.92785000  | -1.20488800 |
| H | -3.02846600 | -6.07530200 | 2.14814400  |
| H | -6.69213000 | 3.46096800  | -1.18511000 |
| H | 2.13381800  | -0.84886300 | -0.36683400 |
| C | 3.07369900  | -1.08602300 | 1.55953800  |
| H | 2.98970500  | -2.17530800 | 1.53847900  |
| H | 4.01191800  | -0.82750600 | 2.05710000  |
| H | 2.25646300  | -0.68957300 | 2.16772000  |
| C | 1.68031100  | 3.06043000  | 0.99982200  |
| C | 0.68169400  | 3.52374100  | 1.86308900  |
| C | 2.60428000  | 3.96059200  | 0.46101300  |
| C | 0.60164700  | 4.87391400  | 2.17725000  |
| H | -0.01104300 | 2.81714600  | 2.30634000  |
| C | 2.51078000  | 5.31448600  | 0.76438700  |
| H | 3.38570600  | 3.61429400  | -0.20541700 |
| C | 1.51233900  | 5.77090500  | 1.62132500  |
| H | -0.16477700 | 5.22718200  | 2.85708500  |
| H | 3.21894800  | 6.01266800  | 0.33410300  |
| H | 1.44752300  | 6.82594400  | 1.86194200  |
| C | 5.61659000  | -0.82269500 | -0.43643200 |
| C | 6.30868200  | -1.48708400 | -1.48165800 |
| C | 7.70430600  | -1.47605800 | -1.58612100 |
| C | 8.40987400  | -0.78279400 | -0.61925000 |
| C | 7.74650900  | -0.11288500 | 0.43044100  |
| C | 6.36652600  | -0.12596300 | 0.53068500  |
| C | 4.20491500  | -1.01282400 | -0.68046700 |
| C | 4.11440700  | -1.76058900 | -1.82607700 |
| H | 8.20630000  | -1.98704300 | -2.39983000 |
| H | 9.49227000  | -0.75108800 | -0.66936700 |
| H | 8.33205700  | 0.42217500  | 1.16927300  |
| H | 5.87312000  | 0.39826100  | 1.34140800  |
| H | 4.84216500  | 0.70447700  | -2.57025000 |
| H | 3.23421700  | -2.11822700 | -2.34052900 |
| H | 5.56608700  | -2.58049200 | -3.14378200 |
| N | 5.36941700  | -2.04866900 | -2.30750800 |
| O | 5.50653300  | 1.35537000  | -2.82878800 |
| H | 3.14933400  | 1.42293100  | -0.84622200 |
| H | 6.24534900  | 1.16874500  | -2.23810400 |
